# Supplementary material for: The Helicobacter pylori Heat-Shock Repressor HspR: Definition of Its Direct Regulon and Characterization of the Cooperative DNA-Binding Mechanism on Its Own Promoter
Source: Front Microbiol. 2018 Aug 14;9:1887. doi: 10.3389/fmicb.2018.01887 (PMC6102357; doi:10.3389/fmicb.2018.01887)
Supplement: TABLE S1 — Annotation of coding genes. [file Table_1.XLS]

## Sheet: Sheet1
GeneNames	G27_Chr	G27_start	G27_end	G27_strand	G27_type	Common_names	description	Cog_CDD	Cog_class
anti_HsrA	NC_011333.1	414500	414750	-	ncRNA	anti_HsrA	NA	NA	Unknown function
cncr1	NC_011333.1	536685	536897	-	ncRNA	cncR1	HsrA regulated ncRNA	NA	Unknown function
isoB	NC_011333.1	834655	834785	+	ncRNA	isoB	NA	NA	Unknown function
nrr1	NC_011333.1	1557285	1557455	+	ncRNA	Nrr1	NikR regulated ncRNA	NA	Unknown function
nrr2	NC_011333.1	79038	79192	+	ncRNA	Nrr2	NikR regulated ncRNA	NA	Unknown function
sRNA2	NC_011333.1	1576830	1576900	-	ncRNA	sRNA2	NA	NA	Unknown function
HPG27_RS00005	NC_011333.1	1	417	-	protein_coding	nusB	N utilization substance protein B	COG0781	Transcription
HPG27_RS00010	NC_011333.1	419	889	-	protein_coding	ribE,ribH	6,7-dimethyl-8-ribityllumazine synthase	COG0054	Coenzyme transport and metabolism
HPG27_RS00015	NC_011333.1	899	1729	-	protein_coding	kdsA	3-deoxy-8-phosphooctulonate synthase	-	Unknown function
HPG27_RS00020	NC_011333.1	1716	2381	-	protein_coding	cynT,icfA	carbonic anhydrase	COG0288	Inorganic ion transport and metabolism
HPG27_RS00025	NC_011333.1	2503	3186	+	protein_coding	pyrF	orotidine-5'-phosphate decarboxylase	COG0284	Nucleotide transport and metabolism
HPG27_RS00030	NC_011333.1	3187	4017	+	protein_coding	panC	pantoate--beta-alanine ligase	COG0414	Coenzyme transport and metabolism
HPG27_RS00060	NC_011333.1	5040	6932	-	protein_coding	hopZ,omp1	hypothetical protein	-	Unknown function
HPG27_RS00070	NC_011333.1	7374	9014	-	protein_coding	groEL,hspB,hsp60,mopA	molecular chaperone GroEL	COG0459	Posttranslational modification, protein turnover, chaperones
HPG27_RS00075	NC_011333.1	9042	9398	-	protein_coding	groES,hspA,hsp10,mopB	co-chaperone GroES	COG0234	Posttranslational modification, protein turnover, chaperones
HPG27_RS00080	NC_011333.1	9684	11363	+	protein_coding	dnaG	DNA primase	COG0358	Replication, recombination and repair
HPG27_RS00085	NC_011333.1	11360	12412	+	protein_coding	HPG27_RS00085	ATP-binding protein	COG0482	Translation, ribosomal structure and biogenesis
HPG27_RS00090	NC_011333.1	12502	13329	+	protein_coding	HPG27_RS00090	hypothetical protein	-	Unknown function
HPG27_RS00095	NC_011333.1	13476	13757	+	protein_coding	comB2	hypothetical protein	-	Unknown function
HPG27_RS00100	NC_011333.1	13757	14020	+	protein_coding	comB3	hypothetical protein	-	Unknown function
HPG27_RS00105	NC_011333.1	14022	16385	+	protein_coding	comB4,virB4_1	VirB4 family type IV secretion/conjugal transfer ATPase	COG3451	Intracellular trafficking, secretion, and vesicular transport
HPG27_RS00110	NC_011333.1	16618	18027	+	protein_coding	HPG27_RS00110	hypothetical protein	COG3014	Unknown function
HPG27_RS00115	NC_011333.1	18135	19100	+	protein_coding	cheV1,cheV,cheV_1	chemotaxis protein CheV	COG0835	Signal transduction mechanisms;Cell motility
HPG27_RS00120	NC_011333.1	19097	20314	+	protein_coding	nspC	carboxynorspermidine decarboxylase	COG0019	Amino acid transport and metabolism
HPG27_RS00125	NC_011333.1	20347	20922	-	protein_coding	lpxE	lipid A 1-phosphatase LpxE	COG0671	Lipid transport and metabolism
HPG27_RS00130	NC_011333.1	20932	22497	-	protein_coding	eptA	phosphoethanolamine--lipid A transferase EptA	COG2194	Cell wall/membrane/envelope biogenesis
HPG27_RS00135	NC_011333.1	22680	22772	+	protein_coding	HPG27_RS00135	hypothetical protein	-	Unknown function
HPG27_RS00140	NC_011333.1	23157	25289	-	protein_coding	hopD,omp2	membrane protein	-	Unknown function
HPG27_RS00145	NC_011333.1	25944	27224	-	protein_coding	gltA	type II citrate synthase	COG0372	Energy production and conversion
HPG27_RS00150	NC_011333.1	27425	28702	+	protein_coding	icd	isocitrate dehydrogenase (NADP(+))	COG0538	Energy production and conversion
HPG27_RS00155	NC_011333.1	28764	29297	+	protein_coding	HPG27_RS00155	hypothetical protein	-	Unknown function
HPG27_RS00160	NC_011333.1	29274	29930	-	protein_coding	bioD	dethiobiotin synthase	COG0132	Coenzyme transport and metabolism
HPG27_RS00165	NC_011333.1	29934	31625	-	protein_coding	HPG27_RS00165	hypothetical protein	-	Unknown function
HPG27_RS00170	NC_011333.1	31734	32147	+	protein_coding	uspA	universal stress protein	-	Unknown function
HPG27_RS00175	NC_011333.1	32178	32453	+	protein_coding	clpS	ATP-dependent Clp protease adaptor ClpS	COG2127	Posttranslational modification, protein turnover, chaperones
HPG27_RS00180	NC_011333.1	32453	34678	+	protein_coding	clpA	ATPase AAA	COG0542	Posttranslational modification, protein turnover, chaperones
HPG27_RS00185	NC_011333.1	34668	35021	+	protein_coding	panD	aspartate 1-decarboxylase	COG0853	Coenzyme transport and metabolism
HPG27_RS00190	NC_011333.1	35024	35326	+	protein_coding	HPG27_RS00190	nucleoid-associated protein, YbaB/EbfC family	COG0718	Unknown function
HPG27_RS00195	NC_011333.1	35326	36321	+	protein_coding	HPG27_RS00195	PDZ domain-containing protein	-	Unknown function
HPG27_RS00200	NC_011333.1	36329	37384	+	protein_coding	HPG27_RS00200	conjugal transfer protein TrbL	COG3846	Intracellular trafficking, secretion, and vesicular transport
HPG27_RS00205	NC_011333.1	37400	37513	+	protein_coding	HPG27_RS00205	hypothetical protein	-	Unknown function
HPG27_RS00210	NC_011333.1	37510	38253	+	protein_coding	comB8,comB1	virB8 family protein	COG3736	Intracellular trafficking, secretion, and vesicular transport
HPG27_RS00215	NC_011333.1	38253	39236	+	protein_coding	com9	conjugal transfer protein	COG3504	Intracellular trafficking, secretion, and vesicular transport
HPG27_RS00220	NC_011333.1	39229	40365	+	protein_coding	comB10,comB3	membrane protein	COG2948	Intracellular trafficking, secretion, and vesicular transport
HPG27_RS00225	NC_011333.1	40437	41855	+	protein_coding	manC,algA	mannose-1-phosphate guanylyltransferase/mannose-6-phosphate isomerase	COG0836	Cell wall/membrane/envelope biogenesis;Carbohydrate transport and metabolism
HPG27_RS00230	NC_011333.1	41865	43010	+	protein_coding	gmd,rfbD	GDP-mannose 4,6-dehydratase	COG1089	Cell wall/membrane/envelope biogenesis
HPG27_RS00235	NC_011333.1	43003	43935	+	protein_coding	nolK	GDP-fucose synthetase	COG0451	Cell wall/membrane/envelope biogenesis
HPG27_RS00240	NC_011333.1	44151	45434	-	protein_coding	tnpB	transposase	COG0675	Mobilome: prophages, transposons
HPG27_RS00245	NC_011333.1	45504	45875	+	protein_coding	tnpA	transposase	COG1943	Mobilome: prophages, transposons
HPG27_RS00255	NC_011333.1	46226	47224	-	protein_coding	hypE	hydrogenase expression/formation protein HypE	COG0309	Posttranslational modification, protein turnover, chaperones
HPG27_RS00260	NC_011333.1	47227	49536	-	protein_coding	hypF	carbamoyltransferase HypF	COG0068	Posttranslational modification, protein turnover, chaperones
HPG27_RS00265	NC_011333.1	49476	50468	-	protein_coding	HPG27_RS00265	agmatine deiminase	COG2957	Amino acid transport and metabolism
HPG27_RS00270	NC_011333.1	50520	51218	-	protein_coding	hpyAVIAM,hpy99VM	site-specific DNA-methyltransferase	COG0863	Replication, recombination and repair
HPG27_RS00275	NC_011333.1	51215	52282	-	protein_coding	hpyAVIBM,DDEM	DNA (cytosine-5-)-methyltransferase	COG0270	Replication, recombination and repair
HPG27_RS00295	NC_011333.1	57419	58909	-	protein_coding	putP	sodium/proline symporter	COG0591	Amino acid transport and metabolism
HPG27_RS00300	NC_011333.1	58936	62493	-	protein_coding	putA	1-pyrroline-5-carboxylate dehydrogenase	COG1012	Amino acid transport and metabolism;Energy production and conversion
HPG27_RS00305	NC_011333.1	62823	63032	+	protein_coding	HPG27_RS00305	hypothetical protein	-	Unknown function
HPG27_RS00310	NC_011333.1	63605	64306	+	protein_coding	Ccrp58	hypothetical protein	-	Unknown function
HPG27_RS00315	NC_011333.1	64308	65042	+	protein_coding	HPG27_RS00315	hypothetical protein	-	Unknown function
HPG27_RS00325	NC_011333.1	67486	68049	+	protein_coding	HPG27_RS00325	hypothetical protein	-	Unknown function
HPG27_RS00330	NC_011333.1	68065	68325	+	protein_coding	HPG27_RS00330	hypothetical protein	-	Unknown function
HPG27_RS00340	NC_011333.1	69706	70131	+	protein_coding	HPG27_RS00340	hypothetical protein	-	Unknown function
HPG27_RS00345	NC_011333.1	70133	70486	+	protein_coding	HPG27_RS00345	hypothetical protein	-	Unknown function
HPG27_RS00355	NC_011333.1	72959	73756	-	protein_coding	ureH	urease accessory protein UreH	COG0829	Posttranslational modification, protein turnover, chaperones
HPG27_RS00360	NC_011333.1	73756	74355	-	protein_coding	ureG	urease accessory protein UreG	COG0378	Posttranslational modification, protein turnover, chaperones
HPG27_RS00370	NC_011333.1	75171	75683	-	protein_coding	ureE	urease accessory protein UreE	COG2371	Posttranslational modification, protein turnover, chaperones
HPG27_RS00375	NC_011333.1	75685	76272	-	protein_coding	ureI	acid-activated urea channel	-	Unknown function
HPG27_RS00380	NC_011333.1	76464	78173	-	protein_coding	ureB	urease subunit beta	COG0804	Amino acid transport and metabolism
HPG27_RS00385	NC_011333.1	78184	78903	-	protein_coding	ureA	urease subunit beta	COG0832	Amino acid transport and metabolism
HPG27_RS00395	NC_011333.1	79249	79722	-	protein_coding	lspA	signal peptidase II	COG0597	Intracellular trafficking, secretion, and vesicular transport;Cell wall/membrane/envelope biogenesis
HPG27_RS00400	NC_011333.1	79716	81053	-	protein_coding	glmM,ureC	phosphoglucosamine mutase	COG1109	Carbohydrate transport and metabolism
HPG27_RS00405	NC_011333.1	81143	81412	+	protein_coding	rps20,rpsT	30S ribosomal protein S20	COG0268	Translation, ribosomal structure and biogenesis
HPG27_RS00410	NC_011333.1	81536	82594	+	protein_coding	prfA	peptide chain release factor 1	COG0216	Translation, ribosomal structure and biogenesis
HPG27_RS00420	NC_011333.1	82993	83775	+	protein_coding	HPG27_RS00420	hypothetical protein	-	Unknown function
HPG27_RS00425	NC_011333.1	84023	85756	+	protein_coding	HPG27_RS00425	hypothetical protein	-	Unknown function
HPG27_RS00435	NC_011333.1	88206	88595	-	protein_coding	rps9,rpsI	30S ribosomal protein S9	COG0103	Translation, ribosomal structure and biogenesis
HPG27_RS00440	NC_011333.1	88592	89017	-	protein_coding	rpl13,rplM	50S ribosomal protein L13	COG0102	Translation, ribosomal structure and biogenesis
HPG27_RS00445	NC_011333.1	89331	89519	-	protein_coding	HPG27_RS00445	hypothetical protein	-	Unknown function
HPG27_RS00450	NC_011333.1	89526	90878	-	protein_coding	mqo	malate:quinone oxidoreductase	COG0579	Carbohydrate transport and metabolism
HPG27_RS00455	NC_011333.1	90932	92305	-	protein_coding	HPG27_RS00455	hypothetical protein	COG0791	Cell wall/membrane/envelope biogenesis
HPG27_RS00460	NC_011333.1	92325	94373	-	protein_coding	rpoD	RNA polymerase sigma factor RpoD	COG0568	Transcription
HPG27_RS00465	NC_011333.1	94567	95262	-	protein_coding	mtn,pfs	5'-methylthioadenosine/S-adenosylhomocysteine nucleosidase	COG0775	Nucleotide transport and metabolism
HPG27_RS00470	NC_011333.1	95273	96202	-	protein_coding	fabD	malonyl CoA-acyl carrier protein transacylase	COG0331	Lipid transport and metabolism
HPG27_RS00485	NC_011333.1	97456	98289	+	protein_coding	hpyAIIIM,hpy99VIM,hsdM	DNA methylase N-4	COG0863	Replication, recombination and repair
HPG27_RS00490	NC_011333.1	98308	98748	-	protein_coding	futC	alpha-1,2-fucosyltransferase	-	Unknown function
HPG27_RS00495	NC_011333.1	98745	99209	-	protein_coding	futC	hypothetical protein	-	Unknown function
HPG27_RS00500	NC_011333.1	99308	99838	-	protein_coding	HPG27_RS00500	hypothetical protein	-	Unknown function
HPG27_RS00505	NC_011333.1	99911	100855	+	protein_coding	HPG27_RS00505	2-hydroxyacid dehydrogenase	COG1052	Coenzyme transport and metabolism;Energy production and conversion
HPG27_RS00510	NC_011333.1	101070	101783	-	protein_coding	HPG27_RS00510	hypothetical protein	-	Unknown function
HPG27_RS00515	NC_011333.1	101890	103344	-	protein_coding	thrC	threonine synthase	COG0498	Amino acid transport and metabolism
HPG27_RS00520	NC_011333.1	103546	105573	+	protein_coding	tlpA	chemotaxis protein	COG0840	Signal transduction mechanisms;Cell motility
HPG27_RS00525	NC_011333.1	105573	106679	+	protein_coding	HPG27_RS00525	hypothetical protein	COG1636	Unknown function
HPG27_RS00530	NC_011333.1	106895	107656	+	protein_coding	HPG27_RS00530	membrane protein	-	Unknown function
HPG27_RS00535	NC_011333.1	107639	108421	-	protein_coding	HPG27_RS00535	glycosyl transferase	COG0463	Cell wall/membrane/envelope biogenesis
HPG27_RS00540	NC_011333.1	108452	110149	-	protein_coding	tlpB	chemotaxis protein	COG0840	Signal transduction mechanisms;Cell motility
HPG27_RS00545	NC_011333.1	110357	112102	-	protein_coding	cpdB	2',3'-cyclic-nucleotide 2'-phosphodiesterase	COG0737	Defense mechanisms;Nucleotide transport and metabolism
HPG27_RS00550	NC_011333.1	112243	112695	-	protein_coding	luxS	S-ribosylhomocysteine lyase	COG1854	Signal transduction mechanisms
HPG27_RS00555	NC_011333.1	112740	113882	-	protein_coding	metB	cystathionine gamma-synthase	COG0626	Amino acid transport and metabolism
HPG27_RS00560	NC_011333.1	113903	114823	-	protein_coding	cysK	cysteine synthase	COG0031	Amino acid transport and metabolism
HPG27_RS00565	NC_011333.1	115061	115345	-	protein_coding	HPG27_RS00565	hypothetical protein	-	Unknown function
HPG27_RS00570	NC_011333.1	115576	117438	-	protein_coding	dnaK	molecular chaperone DnaK	COG0443	Posttranslational modification, protein turnover, chaperones
HPG27_RS00575	NC_011333.1	117469	118044	-	protein_coding	grpE	nucleotide exchange factor GrpE	COG0576	Posttranslational modification, protein turnover, chaperones
HPG27_RS00580	NC_011333.1	118044	118874	-	protein_coding	hrcA	HrcA family transcriptional regulator	-	Unknown function
HPG27_RS00585	NC_011333.1	119255	119893	+	protein_coding	fucA	hypothetical protein	COG0235	Carbohydrate transport and metabolism
HPG27_RS00590	NC_011333.1	119914	120210	+	protein_coding	HPG27_RS00590	hypothetical protein	-	Unknown function
HPG27_RS00595	NC_011333.1	120220	122106	-	protein_coding	HPG27_RS00595	motility accessory factor	COG2604	Unknown function
HPG27_RS00600	NC_011333.1	122164	123708	-	protein_coding	flaB	flagellin B	COG1344	Cell motility
HPG27_RS00605	NC_011333.1	123873	126083	+	protein_coding	topA	DNA topoisomerase I	COG0551	Replication, recombination and repair
HPG27_RS00610	NC_011333.1	126076	127002	+	protein_coding	HPG27_RS00610	radical SAM protein	COG0731	Translation, ribosomal structure and biogenesis
HPG27_RS00615	NC_011333.1	127142	128326	-	protein_coding	HPG27_RS00615	hypothetical protein	-	Unknown function
HPG27_RS00620	NC_011333.1	128482	130920	-	protein_coding	ppsA	phosphoenolpyruvate synthase	COG0574	Carbohydrate transport and metabolism
HPG27_RS00625	NC_011333.1	131107	131238	+	protein_coding	HPG27_RS00625	hypothetical protein	-	Unknown function
HPG27_RS00630	NC_011333.1	131279	133117	+	protein_coding	thrS	threonine--tRNA ligase	COG0441	Translation, ribosomal structure and biogenesis
HPG27_RS00635	NC_011333.1	133114	133725	+	protein_coding	infC	translation initiation factor IF-3	COG0290	Translation, ribosomal structure and biogenesis
HPG27_RS00640	NC_011333.1	133706	133900	+	protein_coding	rpl35,rpmI	50S ribosomal protein L35	COG0291	Translation, ribosomal structure and biogenesis
HPG27_RS00645	NC_011333.1	133995	134345	+	protein_coding	rpl20,rplT	50S ribosomal protein L20	COG0292	Translation, ribosomal structure and biogenesis
HPG27_RS00650	NC_011333.1	134546	135406	+	protein_coding	horB,omp4	membrane protein	-	Unknown function
HPG27_RS00655	NC_011333.1	135458	135583	+	protein_coding	HPG27_RS00655	hypothetical protein	-	Unknown function
HPG27_RS00660	NC_011333.1	135754	136185	+	protein_coding	HPG27_RS00660	hypothetical protein	-	Unknown function
HPG27_RS00665	NC_011333.1	136595	137455	+	protein_coding	HPG27_RS00665	hypothetical protein	-	Unknown function
HPG27_RS00670	NC_011333.1	138106	139473	-	protein_coding	sdaA,sdaB	L-serine ammonia-lyase	COG1760	Amino acid transport and metabolism
HPG27_RS00675	NC_011333.1	139473	140714	-	protein_coding	sdaC	HAAAP family serine/threonine permease	COG0814	Amino acid transport and metabolism
HPG27_RS00680	NC_011333.1	140895	142244	+	protein_coding	aroF,dhs1	3-deoxy-7-phosphoheptulonate synthase class II	COG3200	Amino acid transport and metabolism
HPG27_RS00685	NC_011333.1	142533	142667	+	protein_coding	HPG27_RS00685	hypothetical protein	-	Unknown function
HPG27_RS00690	NC_011333.1	142895	143353	-	protein_coding	bcp	peroxiredoxin	COG1225	Posttranslational modification, protein turnover, chaperones
HPG27_RS00695	NC_011333.1	143363	143998	-	protein_coding	IldE	lactate utilization protein C	COG1556	Energy production and conversion
HPG27_RS00700	NC_011333.1	143991	145436	-	protein_coding	IldF	iron-sulfur cluster-binding protein	COG1139	Energy production and conversion
HPG27_RS00705	NC_011333.1	145466	146194	-	protein_coding	IldG	oxidoreductase	COG0247	Energy production and conversion
HPG27_RS00710	NC_011333.1	146425	148074	+	protein_coding	lctp	lactate permease	COG1620	Energy production and conversion
HPG27_RS00715	NC_011333.1	148123	149778	+	protein_coding	lctp	lactate permease	COG1620	Energy production and conversion
HPG27_RS00720	NC_011333.1	149802	150788	-	protein_coding	mutY	adenine-specific DNA glycosylase	COG1194	Replication, recombination and repair
HPG27_RS00725	NC_011333.1	150789	152237	-	protein_coding	HPG27_RS00725	ABC transporter permease	COG0471	Carbohydrate transport and metabolism
HPG27_RS00730	NC_011333.1	152407	153873	+	protein_coding	fixN	cytochrome c oxidase, cbb3-type subunit I	COG3278	Energy production and conversion
HPG27_RS00735	NC_011333.1	153886	154584	+	protein_coding	fixO	cytochrome c oxidase, cbb3-type subunit II	COG2993	Energy production and conversion
HPG27_RS00740	NC_011333.1	154592	154813	+	protein_coding	fixQ,CcoQ	CcoQ/FixQ family Cbb3-type cytochrome c oxidase assembly chaperone	COG4736	Energy production and conversion
HPG27_RS00745	NC_011333.1	154815	155693	+	protein_coding	fixP	cytochrome c oxidase, cbb3-type subunit III	COG2010	Energy production and conversion
HPG27_RS00750	NC_011333.1	155704	155910	+	protein_coding	HPG27_RS00750	hypothetical protein	-	Unknown function
HPG27_RS00755	NC_011333.1	156011	156604	+	protein_coding	HPG27_RS00755	hypothetical protein	-	Unknown function
HPG27_RS00765	NC_011333.1	157286	158053	+	protein_coding	HPG27_RS00765	hypothetical protein	-	Unknown function
HPG27_RS00770	NC_011333.1	158050	158913	-	protein_coding	HPG27_RS00770	hypothetical protein	COG2107	Unknown function
HPG27_RS00775	NC_011333.1	159012	160055	+	protein_coding	recA	DNA recombination/repair protein RecA	COG0468	Replication, recombination and repair
HPG27_RS00780	NC_011333.1	160067	161347	+	protein_coding	eno	enolase	COG0148	Carbohydrate transport and metabolism
HPG27_RS00785	NC_011333.1	161340	161615	+	protein_coding	HPG27_RS00785	hypothetical protein	-	Unknown function
HPG27_RS00790	NC_011333.1	161626	162228	+	protein_coding	HPG27_RS00790	AMIN domain-containing protein	-	Unknown function
HPG27_RS00795	NC_011333.1	162233	162721	+	protein_coding	aroK	shikimate kinase	COG0703	Amino acid transport and metabolism
HPG27_RS00800	NC_011333.1	162742	163698	+	protein_coding	HPG27_RS00800	hypothetical protein	-	Unknown function
HPG27_RS00805	NC_011333.1	163695	164798	-	protein_coding	rfaJ1,rfaJ	LPS 1,2-glucosyltransferase	COG1442	Cell wall/membrane/envelope biogenesis
HPG27_RS00810	NC_011333.1	164950	165870	+	protein_coding	hcpD,pbp4	Sel1 repeat protein HcpD	COG0790	Signal transduction mechanisms
HPG27_RS00820	NC_011333.1	166658	167380	-	protein_coding	HPG27_RS00820	transcriptional regulator	COG0217	Transcription;Translation, ribosomal structure and biogenesis
HPG27_RS00825	NC_011333.1	167381	168352	-	protein_coding	hemB	delta-aminolevulinic acid dehydratase	COG0113	Coenzyme transport and metabolism
HPG27_RS00835	NC_011333.1	169732	170409	-	protein_coding	arsR,ompR	DNA-binding response regulator	COG0745	Transcription;Signal transduction mechanisms
HPG27_RS00840	NC_011333.1	170644	171132	-	protein_coding	HPG27_RS00840	hypothetical protein	-	Unknown function
HPG27_RS00845	NC_011333.1	171111	171374	-	protein_coding	HPG27_RS00845	hypothetical protein	-	Unknown function
HPG27_RS00850	NC_011333.1	171408	172688	-	protein_coding	prtC	collagenase-like protease	COG0826	Posttranslational modification, protein turnover, chaperones
HPG27_RS00855	NC_011333.1	172691	173422	-	protein_coding	HPG27_RS00855	hypothetical protein	-	Unknown function
HPG27_RS00860	NC_011333.1	173493	174584	-	protein_coding	prfB	peptide chain release factor 2	COG1186	Translation, ribosomal structure and biogenesis
HPG27_RS00865	NC_011333.1	174645	175820	-	protein_coding	moaA	molybdopterin molybdenumtransferase MoeA	COG0303	Coenzyme transport and metabolism
HPG27_RS00870	NC_011333.1	175830	176597	-	protein_coding	fliR	flagellar biosynthesis protein FliR	COG1684	Cell motility
HPG27_RS00875	NC_011333.1	176591	177319	-	protein_coding	HPG27_RS00875	peptidase	-	Unknown function
HPG27_RS00880	NC_011333.1	177806	178705	+	protein_coding	ppiC	peptidyl-prolyl cis-trans isomerase	COG0760	Posttranslational modification, protein turnover, chaperones
HPG27_RS00885	NC_011333.1	178723	179646	+	protein_coding	fba,tsr,kbaY	fructose-bisphosphate aldolase	COG0191	Carbohydrate transport and metabolism
HPG27_RS00890	NC_011333.1	179668	180231	+	protein_coding	efp	elongation factor P	COG0231	Translation, ribosomal structure and biogenesis
HPG27_RS00895	NC_011333.1	180871	181893	-	protein_coding	neuB	pseudaminic acid synthase	COG2089	Cell wall/membrane/envelope biogenesis
HPG27_RS00900	NC_011333.1	181896	182537	-	protein_coding	HPG27_RS00900	ABC transporter ATP-binding protein	COG1136	Cell wall/membrane/envelope biogenesis
HPG27_RS00905	NC_011333.1	182534	183811	-	protein_coding	lnt,cute	apolipoprotein N-acyltransferase	COG0815	Cell wall/membrane/envelope biogenesis
HPG27_RS00910	NC_011333.1	184048	184749	+	protein_coding	HPG27_RS00910	hypothetical protein	COG1286	Unknown function
HPG27_RS00915	NC_011333.1	184759	186264	+	protein_coding	lysS	lysine--tRNA ligase	COG1190	Translation, ribosomal structure and biogenesis
HPG27_RS00920	NC_011333.1	186264	187514	+	protein_coding	glyA	serine hydroxymethyltransferase	COG0112	Amino acid transport and metabolism
HPG27_RS00925	NC_011333.1	187525	188067	+	protein_coding	HPG27_RS00925	ABC transporter	-	Unknown function
HPG27_RS00930	NC_011333.1	188090	188899	+	protein_coding	HPG27_RS00930	hypothetical protein	-	Unknown function
HPG27_RS00935	NC_011333.1	189125	189313	+	protein_coding	HPG27_RS00935	hypothetical protein	-	Unknown function
HPG27_RS00940	NC_011333.1	189291	190508	-	protein_coding	HPG27_RS00940	hypothetical protein	COG1479	Unknown function
HPG27_RS00955	NC_011333.1	191141	191674	+	protein_coding	HPG27_RS00955	TIGR00645 family protein	COG2862	Unknown function
HPG27_RS00960	NC_011333.1	191680	193188	-	protein_coding	HPG27_RS00960	phospholipase D family protein	COG1502	Lipid transport and metabolism
HPG27_RS00965	NC_011333.1	193210	193947	-	protein_coding	frdB	fumarate reductase	COG0479	Energy production and conversion
HPG27_RS00970	NC_011333.1	193940	196084	-	protein_coding	frdA	fumarate reductase flavoprotein subunit	COG1053	Energy production and conversion
HPG27_RS00975	NC_011333.1	196094	196861	-	protein_coding	frdC	fumarate reductase cytochrome b subunit	COG2009	Energy production and conversion
HPG27_RS00980	NC_011333.1	197079	197783	+	protein_coding	tpi,tpiA	triose-phosphate isomerase	COG0149	Carbohydrate transport and metabolism
HPG27_RS00985	NC_011333.1	197793	198620	+	protein_coding	fabI	enoyl-[acyl-carrier-protein] reductase	COG0623	Lipid transport and metabolism
HPG27_RS00990	NC_011333.1	198630	199640	+	protein_coding	lpxD	UDP-3-O-(3-hydroxymyristoyl)glucosamine N-acyltransferase	COG1044	Cell wall/membrane/envelope biogenesis
HPG27_RS00995	NC_011333.1	199705	200862	+	protein_coding	metK,metX	S-adenosylmethionine synthase	COG0192	Coenzyme transport and metabolism
HPG27_RS01000	NC_011333.1	200929	201342	+	protein_coding	ndk	nucleoside-diphosphate kinase	COG0105	Nucleotide transport and metabolism
HPG27_RS01005	NC_011333.1	201367	201723	+	protein_coding	HPG27_RS01005	hypothetical protein	-	Unknown function
HPG27_RS01010	NC_011333.1	201739	201885	+	protein_coding	rpl32,rpmF	50S ribosomal protein L32	COG0333	Translation, ribosomal structure and biogenesis
HPG27_RS01015	NC_011333.1	201960	202982	+	protein_coding	plsX	phosphate acyltransferase	COG0416	Lipid transport and metabolism
HPG27_RS01020	NC_011333.1	203007	203999	+	protein_coding	fabH	3-oxoacyl-ACP synthase III	COG0332	Lipid transport and metabolism
HPG27_RS01030	NC_011333.1	204785	205168	-	protein_coding	HPG27_RS01030	hypothetical protein	-	Unknown function
HPG27_RS01035	NC_011333.1	205242	208370	-	protein_coding	HPG27_RS01035	hypothetical protein	-	Unknown function
HPG27_RS01040	NC_011333.1	208335	209573	+	protein_coding	mpr	Na+/H+ antiporter	COG0489	Cell cycle control, cell division, chromosome partitioning
HPG27_RS01045	NC_011333.1	209588	210610	-	protein_coding	HPG27_RS01045	LPS biosynthesis protein	COG1442	Cell wall/membrane/envelope biogenesis
HPG27_RS01055	NC_011333.1	210915	212267	+	protein_coding	hofA	membrane protein	-	Unknown function
HPG27_RS01060	NC_011333.1	212370	214235	+	protein_coding	htpG	molecular chaperone HtpG	COG0326	Posttranslational modification, protein turnover, chaperones
HPG27_RS01065	NC_011333.1	214433	215185	-	protein_coding	hcpA	Sel1 repeat protein HcpA	COG0790	Signal transduction mechanisms
HPG27_RS01070	NC_011333.1	215266	216432	-	protein_coding	dapE	succinyl-diaminopimelate desuccinylase	COG0624	Amino acid transport and metabolism
HPG27_RS01075	NC_011333.1	216443	218308	-	protein_coding	gidA,mnmG	tRNA uridine-5-carboxymethylaminomethyl(34) synthesis enzyme MnmG	COG0445	Translation, ribosomal structure and biogenesis
HPG27_RS01080	NC_011333.1	218404	220062	+	protein_coding	NaDC-1	carboxylate transporter	COG0471	Carbohydrate transport and metabolism
HPG27_RS01085	NC_011333.1	220075	220875	+	protein_coding	cdsA	phosphatidate cytidylyltransferase	COG0575	Lipid transport and metabolism
HPG27_RS01090	NC_011333.1	220876	221976	+	protein_coding	dxr	1-deoxy-D-xylulose-5-phosphate reductoisomerase	COG0743	Lipid transport and metabolism
HPG27_RS01095	NC_011333.1	222157	222708	-	protein_coding	HPG27_RS01095	phospholipid-binding protein	COG1881	Unknown function
HPG27_RS01100	NC_011333.1	222854	223315	+	protein_coding	HPG27_RS01100	DNA-binding protein	-	Unknown function
HPG27_RS01105	NC_011333.1	223487	224650	+	protein_coding	nifS,iscS	cysteine desulfurase, NifS family	COG1104	Amino acid transport and metabolism
HPG27_RS01110	NC_011333.1	224672	225652	+	protein_coding	nifU	iron-sulfur cluster assembly scaffold protein NifU	COG0822	Posttranslational modification, protein turnover, chaperones
HPG27_RS01115	NC_011333.1	225808	226041	+	protein_coding	HPG27_RS01115	CopG family transcriptional regulator	-	Unknown function
HPG27_RS01120	NC_011333.1	226154	227500	+	protein_coding	radA,sms	DNA repair protein RadA	COG1066	Posttranslational modification, protein turnover, chaperones
HPG27_RS01125	NC_011333.1	227624	228703	+	protein_coding	msrA,msrB	peptide-methionine (R)-S-oxide reductase	COG0229	Posttranslational modification, protein turnover, chaperones
HPG27_RS01130	NC_011333.1	229070	229903	-	protein_coding	HPG27_RS01130	membrane protein	COG0730	Unknown function
HPG27_RS01135	NC_011333.1	230115	232190	-	protein_coding	hopM,omp5	hypothetical protein	-	Unknown function
HPG27_RS01140	NC_011333.1	232416	233588	+	protein_coding	HPG27_RS01140	sulfate permease	COG0659	Inorganic ion transport and metabolism
HPG27_RS01150	NC_011333.1	233816	235276	-	protein_coding	hopA,omp6	membrane protein	-	Unknown function
HPG27_RS01155	NC_011333.1	235470	236201	-	protein_coding	kdsB	3-deoxy-manno-octulosonate cytidylyltransferase	COG1212	Cell wall/membrane/envelope biogenesis
HPG27_RS01160	NC_011333.1	236309	237106	+	protein_coding	dsbK,dsbG,dscB,HpDsbA	hypothetical protein	COG1651	Posttranslational modification, protein turnover, chaperones
HPG27_RS01165	NC_011333.1	237122	237772	+	protein_coding	HPG27_RS01165	hypothetical protein	-	Unknown function
HPG27_RS01170	NC_011333.1	237796	238968	+	protein_coding	gsp	glutathionylspermidine synthase	COG0754	Amino acid transport and metabolism
HPG27_RS01175	NC_011333.1	238968	239498	+	protein_coding	HPG27_RS01175	hypothetical protein	-	Unknown function
HPG27_RS01180	NC_011333.1	240264	241331	-	protein_coding	hcpE	Sel1 repeat protein HcpE	COG0790	Signal transduction mechanisms
HPG27_RS01185	NC_011333.1	241424	241795	-	protein_coding	HPG27_RS01185	cytochrome c oxidase subunit III	-	Unknown function
HPG27_RS01190	NC_011333.1	241795	242715	-	protein_coding	hemC	hydroxymethylbilane synthase	COG0181	Coenzyme transport and metabolism
HPG27_RS01195	NC_011333.1	242726	244459	-	protein_coding	proS	proline--tRNA ligase	COG0442	Translation, ribosomal structure and biogenesis
HPG27_RS01200	NC_011333.1	244463	245812	-	protein_coding	hemA	glutamyl-tRNA reductase	COG0373	Coenzyme transport and metabolism
HPG27_RS01205	NC_011333.1	245812	246735	-	protein_coding	ispB	octaprenyl-diphosphate synthase	COG0142	Coenzyme transport and metabolism
HPG27_RS01210	NC_011333.1	246745	247140	-	protein_coding	HPG27_RS01210	hypothetical protein	-	Unknown function
HPG27_RS01215	NC_011333.1	247133	247417	-	protein_coding	HPG27_RS01215	hypothetical protein	-	Unknown function
HPG27_RS01220	NC_011333.1	247438	247872	-	protein_coding	napA	DNA starvation/stationary phase protection protein	COG0783	Inorganic ion transport and metabolism;Defense mechanisms
HPG27_RS01225	NC_011333.1	248079	249224	-	protein_coding	atoS	two-component sensor histidine kinase	COG0642	Signal transduction mechanisms
HPG27_RS01230	NC_011333.1	249221	249538	-	protein_coding	FlgJ	hypothetical protein	-	Unknown function
HPG27_RS01235	NC_011333.1	249535	250563	-	protein_coding	flgI	flagellar P-ring protein	COG1706	Cell motility
HPG27_RS01240	NC_011333.1	250762	252240	+	protein_coding	deaD	DEAD/DEAH box helicase	COG0513	Replication, recombination and repair
HPG27_RS01245	NC_011333.1	252261	253349	+	protein_coding	HPG27_RS01245	membrane protein	COG0330	Posttranslational modification, protein turnover, chaperones
HPG27_RS01250	NC_011333.1	253356	253895	+	protein_coding	HPG27_RS01250	hypothetical protein	-	Unknown function
HPG27_RS01255	NC_011333.1	253978	255528	-	protein_coding	oppD	ABC transporter ATP-binding protein	COG1123	Posttranslational modification, protein turnover, chaperones
HPG27_RS01260	NC_011333.1	255538	256554	-	protein_coding	oppC	peptide ABC transporter permease	COG4239	Secondary metabolites biosynthesis, transport and catabolism
HPG27_RS01270	NC_011333.1	256896	258326	+	protein_coding	hopF,hopX,omp7	membrane protein	-	Unknown function
HPG27_RS01275	NC_011333.1	258339	259751	+	protein_coding	hopG,hopY,omp8	membrane protein	-	Unknown function
HPG27_RS01280	NC_011333.1	259850	261085	+	protein_coding	purA	adenylosuccinate synthetase	COG0104	Nucleotide transport and metabolism
HPG27_RS01285	NC_011333.1	261082	261510	+	protein_coding	HPG27_RS01285	hypothetical protein	-	Unknown function
HPG27_RS01290	NC_011333.1	261503	262159	+	protein_coding	HPG27_RS01290	hypothetical protein	COG3334	Cell motility
HPG27_RS01295	NC_011333.1	262156	263211	+	protein_coding	RseP	RIP metalloprotease RseP	COG0750	Transcription;Posttranslational modification, protein turnover, chaperones
HPG27_RS01300	NC_011333.1	263224	264486	+	protein_coding	xseA	exodeoxyribonuclease VII large subunit	COG1570	Replication, recombination and repair
HPG27_RS01305	NC_011333.1	264505	265677	-	protein_coding	hpyORF260M,hpyORFJ244M,mod	adenine-specific DNA methyltransferase	COG2189	Replication, recombination and repair
HPG27_RS01310	NC_011333.1	265670	266284	-	protein_coding	HPG27_RS01310	hypothetical protein	-	Unknown function
HPG27_RS01315	NC_011333.1	266442	267134	+	protein_coding	HPG27_RS01315	endonuclease	-	Unknown function
HPG27_RS01320	NC_011333.1	267158	267916	+	protein_coding	hpy99VIIIM,hpaim	site-specific DNA-methyltransferase	COG0863	Replication, recombination and repair
HPG27_RS01325	NC_011333.1	267988	270558	+	protein_coding	clpB	chaperone protein ClpB	COG0542	Posttranslational modification, protein turnover, chaperones
HPG27_RS01330	NC_011333.1	270613	271335	+	protein_coding	ccdA	cytochrome c biogenesis protein CcdA	COG0785	Posttranslational modification, protein turnover, chaperones;Energy production and conversion
HPG27_RS01335	NC_011333.1	271345	272481	+	protein_coding	pyrC1,pyrC	dihydroorotase	COG0044	Nucleotide transport and metabolism
HPG27_RS01340	NC_011333.1	272466	273695	+	protein_coding	HPG27_RS01340	chlorohydrolase	COG0402	Nucleotide transport and metabolism
HPG27_RS01345	NC_011333.1	273756	273998	+	protein_coding	HPG27_RS01345	hypothetical protein	-	Unknown function
HPG27_RS01350	NC_011333.1	274008	275321	+	protein_coding	HPG27_RS01350	tRNA (N6-isopentenyl adenosine(37)-C2)-methylthiotransferase MiaB	COG0621	Translation, ribosomal structure and biogenesis
HPG27_RS01355	NC_011333.1	275361	276014	+	protein_coding	HPG27_RS01355	hypothetical protein	COG2121	Unknown function
HPG27_RS01360	NC_011333.1	276007	276987	+	protein_coding	HPG27_RS01360	hypothetical protein	-	Unknown function
HPG27_RS01375	NC_011333.1	278060	278458	+	protein_coding	HPG27_RS01375	zinc/iron-chelating domain-containing protein	COG0727	Unknown function
HPG27_RS01380	NC_011333.1	278495	279790	+	protein_coding	addB	ATP-dependent nuclease subunit B	-	Unknown function
HPG27_RS01385	NC_011333.1	279921	280478	+	protein_coding	HPG27_RS01385	hypothetical protein	-	Unknown function
HPG27_RS01390	NC_011333.1	280535	280789	+	protein_coding	HPG27_RS01390	ferredoxin	-	Unknown function
HPG27_RS01395	NC_011333.1	280799	282253	+	protein_coding	gppA	guanosine polyphosphate pyrophosphohydrolase	COG0248	Signal transduction mechanisms;Inorganic ion transport and metabolism;Nucleotide transport and metabolism
HPG27_RS01400	NC_011333.1	282250	283260	+	protein_coding	waaC,rfaC	lipopolysaccharide heptosyltransferase I	COG0859	Cell wall/membrane/envelope biogenesis
HPG27_RS01405	NC_011333.1	283257	284243	+	protein_coding	waaM,ibpB	lauroyl acyltransferase	COG1560	Lipid transport and metabolism
HPG27_RS01410	NC_011333.1	284497	285612	-	protein_coding	tgt	tRNA guanosine(34) transglycosylase Tgt	COG0343	Translation, ribosomal structure and biogenesis
HPG27_RS01415	NC_011333.1	285663	287105	+	protein_coding	trkA	potassium transporter TrkA	COG3400	Unknown function
HPG27_RS01420	NC_011333.1	287110	288141	+	protein_coding	aroB	3-dehydroquinate synthase	COG0337	Amino acid transport and metabolism
HPG27_RS01425	NC_011333.1	288132	289703	+	protein_coding	HPG27_RS01425	membrane protein	COG0668	Cell wall/membrane/envelope biogenesis
HPG27_RS01430	NC_011333.1	289700	290956	+	protein_coding	HPG27_RS01430	tRNA (N(6)-L-threonylcarbamoyladenosine(37)-C(2))-methylthiotransferase MtaB	COG0621	Translation, ribosomal structure and biogenesis
HPG27_RS01435	NC_011333.1	290943	292595	+	protein_coding	ftsH1,ftsH,ftsH_1	cell division protein FstH	COG0465	Posttranslational modification, protein turnover, chaperones
HPG27_RS01440	NC_011333.1	292598	293116	+	protein_coding	HPG27_RS01440	hypothetical protein	-	Unknown function
HPG27_RS01445	NC_011333.1	293129	293602	+	protein_coding	HPG27_RS01445	membrane protein	-	Unknown function
HPG27_RS01450	NC_011333.1	293670	302387	+	protein_coding	ImaA	toxin outer membrane protein	COG5651	Unknown function
HPG27_RS01455	NC_011333.1	302435	303652	+	protein_coding	lysA	diaminopimelate decarboxylase	COG0019	Amino acid transport and metabolism
HPG27_RS01460	NC_011333.1	303657	303947	+	protein_coding	pheA	chorismate mutase	COG1605	Amino acid transport and metabolism
HPG27_RS01465	NC_011333.1	303960	304832	+	protein_coding	HPG27_RS01465	hypothetical protein	COG4866	Unknown function
HPG27_RS01470	NC_011333.1	304833	306512	+	protein_coding	pabB	para-aminobenzoate synthase	COG0147	Amino acid transport and metabolism;Coenzyme transport and metabolism
HPG27_RS01475	NC_011333.1	306706	307725	+	protein_coding	amiE	aliphatic amidase	COG0388	Unknown function
HPG27_RS01480	NC_011333.1	307808	310294	-	protein_coding	flgL	flagellar hook-associated protein FlgL	COG1344	Cell motility
HPG27_RS01485	NC_011333.1	310537	310851	+	protein_coding	rpl21,rplU	50S ribosomal protein L21	COG0261	Translation, ribosomal structure and biogenesis
HPG27_RS01490	NC_011333.1	310866	311132	+	protein_coding	rpl27,rpmA	50S ribosomal protein L27	COG0211	Translation, ribosomal structure and biogenesis
HPG27_RS01495	NC_011333.1	311249	312898	+	protein_coding	dppA	ABC transporter substrate-binding protein	COG0747	Amino acid transport and metabolism
HPG27_RS01500	NC_011333.1	312909	313913	+	protein_coding	dppB	peptide ABC transporter permease	COG0601	Inorganic ion transport and metabolism;Amino acid transport and metabolism
HPG27_RS01505	NC_011333.1	313913	314770	+	protein_coding	dppC	peptide ABC transporter	COG1173	Amino acid transport and metabolism;Inorganic ion transport and metabolism
HPG27_RS01510	NC_011333.1	314782	315645	+	protein_coding	dppD	ABC transporter ATP-binding protein	COG0444	Inorganic ion transport and metabolism;Amino acid transport and metabolism
HPG27_RS01515	NC_011333.1	315642	316448	+	protein_coding	dppF	ABC transporter ATP-binding protein	COG1123	Posttranslational modification, protein turnover, chaperones
HPG27_RS01520	NC_011333.1	316467	317549	+	protein_coding	obg,obgE	GTPase ObgE	COG0536	Replication, recombination and repair;Cell cycle control, cell division, chromosome partitioning
HPG27_RS01525	NC_011333.1	317586	318581	+	protein_coding	HPG27_RS01525	alginate lyase	-	Unknown function
HPG27_RS01530	NC_011333.1	318827	319381	+	protein_coding	HPG27_RS01530	polyisoprenoid-binding protein	-	Unknown function
HPG27_RS01535	NC_011333.1	319391	320683	+	protein_coding	hemL	glutamate-1-semialdehyde 2,1-aminomutase	COG0001	Coenzyme transport and metabolism
HPG27_RS01540	NC_011333.1	320680	320952	+	protein_coding	HPG27_RS01540	hypothetical protein	-	Unknown function
HPG27_RS01545	NC_011333.1	320968	321372	+	protein_coding	HPG27_RS01545	hypothetical protein	-	Unknown function
HPG27_RS01550	NC_011333.1	321456	322340	+	protein_coding	HPG27_RS01550	N-carbamoyl-D-amino acid amidohydrolase	COG0388	Unknown function
HPG27_RS01555	NC_011333.1	322353	323234	+	protein_coding	pgdA	peptidoglycan deacetylase	COG0726	Carbohydrate transport and metabolism;Cell wall/membrane/envelope biogenesis
HPG27_RS01560	NC_011333.1	323288	323977	-	protein_coding	HPG27_RS01560	hypothetical protein	-	Unknown function
HPG27_RS01570	NC_011333.1	325188	325556	+	protein_coding	HPG27_RS01570	hypothetical protein	-	Unknown function
HPG27_RS01575	NC_011333.1	325556	326518	+	protein_coding	HPG27_RS01575	ATP-binding protein	COG0523	Unknown function
HPG27_RS01580	NC_011333.1	326524	327669	-	protein_coding	narK	MFS transporter	COG2814	Carbohydrate transport and metabolism
HPG27_RS01585	NC_011333.1	328012	328338	-	protein_coding	HPG27_RS01585	YafQ family addiction module toxin	COG3041	Translation, ribosomal structure and biogenesis
HPG27_RS01590	NC_011333.1	328325	328696	-	protein_coding	HPG27_RS01590	hypothetical protein	-	Unknown function
HPG27_RS01595	NC_011333.1	329099	331333	-	protein_coding	babA,omp28	membrane protein	-	Unknown function
HPG27_RS01600	NC_011333.1	331602	332357	-	protein_coding	hugZ	HugZ family heme oxygenase	COG0748	Inorganic ion transport and metabolism
HPG27_RS01605	NC_011333.1	332418	334043	-	protein_coding	argS	arginine--tRNA ligase	COG0018	Translation, ribosomal structure and biogenesis
HPG27_RS01615	NC_011333.1	334358	334978	-	protein_coding	gmk	guanylate kinase	COG0194	Nucleotide transport and metabolism
HPG27_RS01620	NC_011333.1	334971	336410	-	protein_coding	HPG27_RS01620	hypothetical protein	-	Unknown function
HPG27_RS01625	NC_011333.1	336554	337096	+	protein_coding	nucT	nuclease	COG1502	Lipid transport and metabolism
HPG27_RS01630	NC_011333.1	337105	337869	-	protein_coding	horC,omp10	membrane protein	-	Unknown function
HPG27_RS01635	NC_011333.1	337983	338696	+	protein_coding	flgH	flagellar basal body L-ring protein	COG2063	Cell motility
HPG27_RS01640	NC_011333.1	338714	339403	+	protein_coding	neuA	pseudaminic acid cytidylyltransferase	-	Unknown function
HPG27_RS01645	NC_011333.1	339373	340266	+	protein_coding	neuA	CMP-N-acetylneuraminic acid synthetase	-	Unknown function
HPG27_RS01650	NC_011333.1	340263	340805	+	protein_coding	flaG	UDP-4-amino-4,6-dideoxy-N-acetyl-beta-L-altrosamine N-acetyltransferase	COG1670	Posttranslational modification, protein turnover, chaperones;Translation, ribosomal structure and biogenesis
HPG27_RS01655	NC_011333.1	340738	341676	-	protein_coding	lpxK	tetraacyldisaccharide 4'-kinase	COG1663	Cell wall/membrane/envelope biogenesis
HPG27_RS01660	NC_011333.1	341673	342455	-	protein_coding	nadE	NAD(+) synthetase	COG0171	Coenzyme transport and metabolism
HPG27_RS01670	NC_011333.1	342703	343695	+	protein_coding	ilvC	ketol-acid reductoisomerase	COG0059	Coenzyme transport and metabolism;Amino acid transport and metabolism
HPG27_RS01675	NC_011333.1	343719	344525	+	protein_coding	minD	septum site-determining protein MinD	COG2894	Cell cycle control, cell division, chromosome partitioning
HPG27_RS01680	NC_011333.1	344522	344755	+	protein_coding	minE	cell division topological specificity factor	COG0851	Cell cycle control, cell division, chromosome partitioning
HPG27_RS01685	NC_011333.1	344762	345562	+	protein_coding	dprA	DNA protecting protein DprA	COG0758	Replication, recombination and repair
HPG27_RS01690	NC_011333.1	345559	345963	+	protein_coding	HPG27_RS01690	Holliday junction resolvase RuvX	COG0816	Transcription
HPG27_RS01695	NC_011333.1	346081	346764	+	protein_coding	HPG27_RS01695	HcpA family protein	COG0790	Signal transduction mechanisms
HPG27_RS01700	NC_011333.1	346879	347217	+	protein_coding	HPG27_RS01700	hypothetical protein	-	Unknown function
HPG27_RS01705	NC_011333.1	347201	347761	+	protein_coding	HPG27_RS01705	hypothetical protein	-	Unknown function
HPG27_RS01725	NC_011333.1	349127	349912	+	protein_coding	HPG27_RS01725	hypothetical protein	-	Unknown function
HPG27_RS01730	NC_011333.1	349902	350090	+	protein_coding	HPG27_RS01730	hypothetical protein	-	Unknown function
HPG27_RS01735	NC_011333.1	350268	351071	+	protein_coding	HPG27_RS01735	hypothetical protein	-	Unknown function
HPG27_RS01740	NC_011333.1	351089	351982	-	protein_coding	rluD1	RNA pseudouridine synthase	COG0564	Translation, ribosomal structure and biogenesis
HPG27_RS01745	NC_011333.1	351982	353532	-	protein_coding	recJ	single-stranded-DNA-specific exonuclease RecJ	COG0608	Replication, recombination and repair
HPG27_RS01750	NC_011333.1	353541	355157	-	protein_coding	pyrG	CTP synthetase	COG0504	Nucleotide transport and metabolism
HPG27_RS01755	NC_011333.1	355418	356086	+	protein_coding	HPG27_RS01755	hypothetical protein	-	Unknown function
HPG27_RS01760	NC_011333.1	356130	357833	+	protein_coding	fliF	flagellar M-ring protein FliF	COG1766	Cell motility;Intracellular trafficking, secretion, and vesicular transport
HPG27_RS01765	NC_011333.1	357851	358882	+	protein_coding	fliG	flagellar motor switch protein FliG	COG1536	Cell motility
HPG27_RS01770	NC_011333.1	358869	359645	+	protein_coding	fliH	flagellar assembly protein FliH	COG1317	Cell motility;Intracellular trafficking, secretion, and vesicular transport
HPG27_RS01775	NC_011333.1	359642	361498	+	protein_coding	dxs	1-deoxy-D-xylulose-5-phosphate synthase	COG1154	Coenzyme transport and metabolism;Lipid transport and metabolism
HPG27_RS01780	NC_011333.1	361495	363303	+	protein_coding	lepA	elongation factor 4	COG0481	Translation, ribosomal structure and biogenesis
HPG27_RS01785	NC_011333.1	363318	364073	+	protein_coding	HPG27_RS01785	hypothetical protein	-	Unknown function
HPG27_RS01790	NC_011333.1	364427	365029	+	protein_coding	HPG27_RS01790	hypothetical protein	-	Unknown function
HPG27_RS01795	NC_011333.1	365459	366433	+	protein_coding	HPG27_RS01795	hypothetical protein	-	Unknown function
HPG27_RS01800	NC_011333.1	366728	367537	-	protein_coding	flgG1,flgG	flagellar basal body rod protein FlgG	COG4786	Cell motility
HPG27_RS01805	NC_011333.1	367591	368877	-	protein_coding	kgtP	MFS transporter	COG0477	Carbohydrate transport and metabolism;Amino acid transport and metabolism;Inorganic ion transport and metabolism
HPG27_RS01810	NC_011333.1	369142	371730	-	protein_coding	ftsK	cell division protein FtsK	COG1674	Cell cycle control, cell division, chromosome partitioning
HPG27_RS01815	NC_011333.1	371718	374039	-	protein_coding	HPG27_RS01815	exonuclease	COG3893	Replication, recombination and repair
HPG27_RS01820	NC_011333.1	374036	375961	-	protein_coding	tktA	transketolase	COG0021	Carbohydrate transport and metabolism
HPG27_RS01825	NC_011333.1	376008	376850	-	protein_coding	ribF,ribC	bifunctional riboflavin kinase/FMN adenylyltransferase	COG0196	Coenzyme transport and metabolism
HPG27_RS01830	NC_011333.1	376816	377523	-	protein_coding	tlyA,tly	TlyA family rRNA (cytidine-2'-O)-methyltransferase	COG1189	Translation, ribosomal structure and biogenesis
HPG27_RS01835	NC_011333.1	377523	378038	-	protein_coding	HPG27_RS01835	hypothetical protein	-	Unknown function
HPG27_RS01840	NC_011333.1	378105	379028	+	protein_coding	pyrB	aspartate carbamoyltransferase	COG0540	Nucleotide transport and metabolism
HPG27_RS01845	NC_011333.1	379322	380761	+	protein_coding	hofB	membrane protein	-	Unknown function
HPG27_RS01850	NC_011333.1	380852	382507	+	protein_coding	msbA	ABC transporter permease	COG1132	Defense mechanisms
HPG27_RS01855	NC_011333.1	382501	383124	+	protein_coding	HPG27_RS01855	hypothetical protein	-	Unknown function
HPG27_RS01860	NC_011333.1	383128	383697	+	protein_coding	HPG27_RS01860	restriction endonuclease	COG1787	Defense mechanisms
HPG27_RS01865	NC_011333.1	383822	384817	+	protein_coding	nixA	nickel transporter NixA	COG3376	Inorganic ion transport and metabolism
HPG27_RS01870	NC_011333.1	384821	385342	-	protein_coding	HPG27_RS01870	hypothetical protein	-	Unknown function
HPG27_RS01875	NC_011333.1	385477	386793	+	protein_coding	csd4	purine-nucleoside phosphorylase	-	Unknown function
HPG27_RS01880	NC_011333.1	387476	387676	-	protein_coding	copP	COP-associated protein	COG2608	Inorganic ion transport and metabolism
HPG27_RS01885	NC_011333.1	387677	389914	-	protein_coding	copA	copper-translocating P-type ATPase	COG2217	Inorganic ion transport and metabolism
HPG27_RS01890	NC_011333.1	389911	390624	-	protein_coding	pssA	CDP-diacylglycerol--serine O-phosphatidyltransferase	COG1183	Lipid transport and metabolism
HPG27_RS01895	NC_011333.1	390614	390868	-	protein_coding	HPG27_RS01895	hypothetical protein	-	Unknown function
HPG27_RS01900	NC_011333.1	390871	392769	-	protein_coding	ftsH2,ftsH,ftsH_2	ATP-dependent zinc metalloprotease FtsH	COG0465	Posttranslational modification, protein turnover, chaperones
HPG27_RS01905	NC_011333.1	392778	393755	-	protein_coding	prmA	50S ribosomal protein L11 methyltransferase	COG2264	Translation, ribosomal structure and biogenesis
HPG27_RS01910	NC_011333.1	393768	394142	-	protein_coding	cheY,cheY1	two-component system response regulator	COG0784	Signal transduction mechanisms
HPG27_RS01915	NC_011333.1	394433	395035	+	protein_coding	horD	membrane protein	-	Unknown function
HPG27_RS01925	NC_011333.1	395167	395574	-	protein_coding	HPG27_RS01925	hypothetical protein	-	Unknown function
HPG27_RS01930	NC_011333.1	395577	395858	-	protein_coding	HPG27_RS01930	prokaryotic metallothionein family protein	-	Unknown function
HPG27_RS01935	NC_011333.1	395801	396337	-	protein_coding	gidB	ribosomal RNA small subunit methyltransferase G	COG0357	Translation, ribosomal structure and biogenesis
HPG27_RS01940	NC_011333.1	396334	397371	-	protein_coding	queA	tRNA preQ1(34) S-adenosylmethionine ribosyltransferase-isomerase QueA	COG0809	Translation, ribosomal structure and biogenesis
HPG27_RS01945	NC_011333.1	397372	398121	-	protein_coding	tatC	twin-arginine translocase subunit TatC	COG0805	Intracellular trafficking, secretion, and vesicular transport
HPG27_RS01950	NC_011333.1	398114	398581	-	protein_coding	tatB	twin-arginine translocase subunit TatB	COG1826	Intracellular trafficking, secretion, and vesicular transport
HPG27_RS01970	NC_011333.1	401320	402192	+	protein_coding	HPG27_RS01970	hypothetical protein	-	Unknown function
HPG27_RS01975	NC_011333.1	402201	403145	+	protein_coding	HPG27_RS01975	membrane protein	-	Unknown function
HPG27_RS01980	NC_011333.1	403209	404477	+	protein_coding	HPG27_RS01980	hypothetical protein	COG0739	Cell wall/membrane/envelope biogenesis
HPG27_RS01985	NC_011333.1	404414	405067	+	protein_coding	minC	septum site-determining protein MinC	COG0850	Cell cycle control, cell division, chromosome partitioning
HPG27_RS01990	NC_011333.1	405064	405951	+	protein_coding	lpxC,envA	UDP-3-O-[3-hydroxymyristoyl] N-acetylglucosamine deacetylase	COG0774	Cell wall/membrane/envelope biogenesis
HPG27_RS01995	NC_011333.1	406024	406446	+	protein_coding	HPG27_RS01995	hypothetical protein	COG1214	Translation, ribosomal structure and biogenesis
HPG27_RS02000	NC_011333.1	406500	407381	+	protein_coding	thrB	homoserine kinase	COG0083	Amino acid transport and metabolism
HPG27_RS02005	NC_011333.1	407353	407622	+	protein_coding	HPG27_RS02005	hypothetical protein	COG2740	Unknown function
HPG27_RS02010	NC_011333.1	407619	410432	+	protein_coding	infB	translation initiation factor IF-2	COG0532	Translation, ribosomal structure and biogenesis
HPG27_RS02015	NC_011333.1	410432	410767	+	protein_coding	rbfA	ribosome-binding factor A	COG0858	Translation, ribosomal structure and biogenesis
HPG27_RS02020	NC_011333.1	410760	411200	+	protein_coding	rimP	ribosome maturation factor	COG0779	Translation, ribosomal structure and biogenesis
HPG27_RS02025	NC_011333.1	411308	413296	-	protein_coding	acoE	acetyl-coenzyme A synthetase	COG0365	Lipid transport and metabolism
HPG27_RS02030	NC_011333.1	413496	414608	+	protein_coding	HPG27_RS02030	metallophosphoesterase	COG1408	Unknown function
HPG27_RS02035	NC_011333.1	414948	415619	+	protein_coding	HsrA	DNA-binding response regulator	COG0745	Transcription;Signal transduction mechanisms
HPG27_RS02040	NC_011333.1	416420	417466	-	protein_coding	HPG27_RS02040	hypothetical protein	COG2404	Translation, ribosomal structure and biogenesis;Signal transduction mechanisms
HPG27_RS02045	NC_011333.1	417493	419694	-	protein_coding	flbA,flhA	flagellar biosynthesis protein FlhA	COG1298	Cell motility
HPG27_RS02050	NC_011333.1	419827	420099	+	protein_coding	rps15,rpsO	30S ribosomal protein S15	COG0184	Translation, ribosomal structure and biogenesis
HPG27_RS02055	NC_011333.1	420130	421419	+	protein_coding	HPG27_RS02055	polymerase	COG3307	Cell wall/membrane/envelope biogenesis
HPG27_RS02060	NC_011333.1	421549	422052	+	protein_coding	aroQ,aroD	3-dehydroquinate dehydratase	COG0757	Amino acid transport and metabolism
HPG27_RS02065	NC_011333.1	422066	423139	+	protein_coding	pepQ	peptidase M24 family protein	COG0006	Amino acid transport and metabolism
HPG27_RS02070	NC_011333.1	423136	423627	+	protein_coding	folK	2-amino-4-hydroxy-6-hydroxymethyldihydropteridine diphosphokinase	COG0801	Coenzyme transport and metabolism
HPG27_RS02075	NC_011333.1	423621	424994	+	protein_coding	flhF	flagellar biosynthesis regulator FlhF	COG1419	Cell motility
HPG27_RS02080	NC_011333.1	424991	425875	+	protein_coding	ylxH	ATP-binding protein	COG0455	Cell motility;Cell cycle control, cell division, chromosome partitioning
HPG27_RS02085	NC_011333.1	425880	426194	+	protein_coding	HPG27_RS02085	hypothetical protein	-	Unknown function
HPG27_RS02090	NC_011333.1	426172	426939	+	protein_coding	fliA	RNA polymerase sigma factor FliA	COG1191	Transcription
HPG27_RS02095	NC_011333.1	426932	427996	+	protein_coding	fliM	flagellar motor switch protein FliM	COG1868	Cell motility
HPG27_RS02100	NC_011333.1	428000	428863	+	protein_coding	fliY	flagellar motor switch protein FliY	COG1886	Signal transduction mechanisms;Intracellular trafficking, secretion, and vesicular transport;Cell motility
HPG27_RS02105	NC_011333.1	428893	429429	+	protein_coding	HPG27_RS02105	hypothetical protein	COG2731	Carbohydrate transport and metabolism
HPG27_RS02110	NC_011333.1	429426	429929	+	protein_coding	HPG27_RS02110	hypothetical protein	COG4731	Unknown function
HPG27_RS02115	NC_011333.1	429949	430401	-	protein_coding	fur	transcriptional repressor	COG0735	Inorganic ion transport and metabolism
HPG27_RS02120	NC_011333.1	430561	431736	-	protein_coding	rarA	recombinase RarA	COG2256	Replication, recombination and repair
HPG27_RS02130	NC_011333.1	432113	432979	-	protein_coding	dnaJ1,CbpA	DnaJ family protein	COG0484	Posttranslational modification, protein turnover, chaperones
HPG27_RS02140	NC_011333.1	434490	435326	-	protein_coding	HPG27_RS02140	5'-3' exonuclease	COG0258	Replication, recombination and repair
HPG27_RS02145	NC_011333.1	435582	436478	-	protein_coding	cheY	response regulator	COG0784	Signal transduction mechanisms
HPG27_RS02150	NC_011333.1	436500	437720	-	protein_coding	ispDF	bifunctional 2-C-methyl-D-erythritol 4-phosphate cytidylyltransferase/2-C-methyl-D-erythritol 2,4-cyclodiphosphate synthase	COG0245	Lipid transport and metabolism
HPG27_RS02155	NC_011333.1	437742	439172	-	protein_coding	htrA	serine endoprotease DegQ	COG0265	Posttranslational modification, protein turnover, chaperones
HPG27_RS02160	NC_011333.1	439216	440658	-	protein_coding	rocE	S-methylmethionine transporter	COG0833	Amino acid transport and metabolism
HPG27_RS02170	NC_011333.1	441407	441913	-	protein_coding	HPG27_RS02170	hypothetical protein	-	Unknown function
HPG27_RS02175	NC_011333.1	442025	442813	-	protein_coding	hdhA	7-alpha-hydroxysteroid dehydrogenase	COG1028	Secondary metabolites biosynthesis, transport and catabolism;Lipid transport and metabolism
HPG27_RS02180	NC_011333.1	442810	443712	-	protein_coding	dapA	4-hydroxy-tetrahydrodipicolinate synthase	COG0329	Cell wall/membrane/envelope biogenesis;Amino acid transport and metabolism
HPG27_RS02185	NC_011333.1	443727	445061	-	protein_coding	pqqE	peptidase M16	COG0612	Unknown function
HPG27_RS02190	NC_011333.1	445058	446113	-	protein_coding	pyrD	dihydroorotate dehydrogenase (quinone)	COG0167	Nucleotide transport and metabolism
HPG27_RS02195	NC_011333.1	446151	448178	-	protein_coding	ppk	RNA degradosome polyphosphate kinase	COG0855	Inorganic ion transport and metabolism
HPG27_RS02205	NC_011333.1	448839	449957	-	protein_coding	hsdS1,hsdS	hypothetical protein	COG0732	Defense mechanisms
HPG27_RS02210	NC_011333.1	449950	451581	-	protein_coding	hsdM1,hsdM	N-6 DNA methylase	COG0286	Defense mechanisms
HPG27_RS02220	NC_011333.1	454787	456682	-	protein_coding	HPG27_RS02220	hypothetical protein	COG2604	Unknown function
HPG27_RS02225	NC_011333.1	456708	457475	-	protein_coding	HPG27_RS02225	hypothetical protein	-	Unknown function
HPG27_RS02230	NC_011333.1	457485	457832	-	protein_coding	HPG27_RS02230	hypothetical protein	-	Unknown function
HPG27_RS02235	NC_011333.1	457801	459288	-	protein_coding	HPG27_RS02235	hypothetical protein	-	Unknown function
HPG27_RS02240	NC_011333.1	459300	459788	-	protein_coding	HPG27_RS02240	hypothetical protein	-	Unknown function
HPG27_RS02245	NC_011333.1	459773	461509	-	protein_coding	pepF	oligoendopeptidase F	COG1164	Amino acid transport and metabolism
HPG27_RS02250	NC_011333.1	461607	462857	-	protein_coding	kefB	potassium transporter	COG0475	Inorganic ion transport and metabolism
HPG27_RS02255	NC_011333.1	463178	463738	-	protein_coding	horE,omp11	membrane protein	-	Unknown function
HPG27_RS02260	NC_011333.1	463965	464705	+	protein_coding	modA	molybdate ABC transporter substrate-binding protein	COG0725	Inorganic ion transport and metabolism
HPG27_RS02265	NC_011333.1	464727	465401	+	protein_coding	modB	molybdenum ABC transporter permease subunit	COG4149	Inorganic ion transport and metabolism
HPG27_RS02270	NC_011333.1	465398	466195	+	protein_coding	modD	molybdenum ABC transporter ATP-binding protein	COG1118	Inorganic ion transport and metabolism
HPG27_RS02275	NC_011333.1	466281	467672	-	protein_coding	gltX1,gltX,gltX_1	glutamate--tRNA ligase	COG0008	Translation, ribosomal structure and biogenesis
HPG27_RS02280	NC_011333.1	467790	468893	+	protein_coding	hopJ,omp12	membrane protein	-	Unknown function
HPG27_RS02285	NC_011333.1	468902	470539	+	protein_coding	hpyAVIIM,VSPIM	DNA methyltransferase	COG0827	Replication, recombination and repair
HPG27_RS02290	NC_011333.1	470505	471347	+	protein_coding	HPG27_RS02290	hypothetical protein	COG0859	Cell wall/membrane/envelope biogenesis
HPG27_RS02295	NC_011333.1	471393	473195	+	protein_coding	yihK,typA	translational GTPase TypA	COG1217	Signal transduction mechanisms
HPG27_RS02300	NC_011333.1	473207	474136	+	protein_coding	MFOKI	type II restriction endonuclease	COG0338	Replication, recombination and repair
HPG27_RS02310	NC_011333.1	474852	475898	+	protein_coding	HPG27_RS02310	DNA (cytosine-5-)-methyltransferase	COG0270	Replication, recombination and repair
HPG27_RS02325	NC_011333.1	476886	477830	-	protein_coding	HPG27_RS02325	catalase	-	Unknown function
HPG27_RS02330	NC_011333.1	478120	479706	+	protein_coding	hofC	membrane protein	-	Unknown function
HPG27_RS02335	NC_011333.1	479777	481174	+	protein_coding	hofD	membrane protein	-	Unknown function
HPG27_RS02340	NC_011333.1	481407	481607	-	protein_coding	HPG27_RS02340	hypothetical protein	-	Unknown function
HPG27_RS02345	NC_011333.1	481576	483813	+	protein_coding	HPG27_RS02345	hypothetical protein	-	Unknown function
HPG27_RS02350	NC_011333.1	483810	484667	+	protein_coding	HPG27_RS02350	hypothetical protein	-	Unknown function
HPG27_RS02355	NC_011333.1	484688	484882	+	protein_coding	HPG27_RS02355	hypothetical protein	-	Unknown function
HPG27_RS02360	NC_011333.1	485047	486183	-	protein_coding	HPG27_RS02360	potassium channel protein	COG1226	Inorganic ion transport and metabolism
HPG27_RS02365	NC_011333.1	486334	486522	-	protein_coding	rpL28,rpmB	50S ribosomal protein L28	COG0227	Translation, ribosomal structure and biogenesis
HPG27_RS02370	NC_011333.1	486621	487457	-	protein_coding	HPG27_RS02370	neuraminyllactose-binding hemagglutinin	-	Unknown function
HPG27_RS02375	NC_011333.1	487583	488644	+	protein_coding	mraY	phospho-N-acetylmuramoyl-pentapeptide-transferase	COG0472	Cell wall/membrane/envelope biogenesis
HPG27_RS02380	NC_011333.1	488646	489914	+	protein_coding	murD	UDP-N-acetylmuramoyl-L-alanine--D-glutamate ligase	COG0771	Cell wall/membrane/envelope biogenesis
HPG27_RS02385	NC_011333.1	489911	490171	-	protein_coding	HPG27_RS02385	DUF493 domain-containing protein	-	Unknown function
HPG27_RS02390	NC_011333.1	490161	490562	-	protein_coding	tbgC	hypothetical protein	COG0824	Lipid transport and metabolism
HPG27_RS02395	NC_011333.1	490792	492120	+	protein_coding	HPG27_RS02395	sodium-dependent transporter	COG0733	Unknown function
HPG27_RS02400	NC_011333.1	492133	493461	+	protein_coding	HPG27_RS02400	sodium-dependent transporter	COG0733	Unknown function
HPG27_RS02410	NC_011333.1	494599	495723	+	protein_coding	dnaN	DNA polymerase III subunit beta	COG0592	Replication, recombination and repair
HPG27_RS02415	NC_011333.1	495736	498057	+	protein_coding	gyrB	DNA gyrase subunit B	COG0187	Replication, recombination and repair
HPG27_RS02420	NC_011333.1	498103	499095	+	protein_coding	HPG27_RS02420	hypothetical protein	-	Unknown function
HPG27_RS02425	NC_011333.1	499088	499720	+	protein_coding	HPG27_RS02425	restriction endonuclease	-	Unknown function
HPG27_RS02430	NC_011333.1	499929	501140	+	protein_coding	hdpA	membrane protein	COG0739	Cell wall/membrane/envelope biogenesis
HPG27_RS02435	NC_011333.1	501140	501766	+	protein_coding	HPG27_RS02435	NUDIX domain-containing protein	COG0494	Defense mechanisms
HPG27_RS02440	NC_011333.1	501777	503126	+	protein_coding	pgbA	plasmid stabilization protein	-	Unknown function
HPG27_RS02445	NC_011333.1	503128	504507	+	protein_coding	glcD	glycolate oxidase subunit GlcD	COG0277	Energy production and conversion
HPG27_RS02450	NC_011333.1	504530	505294	+	protein_coding	dapB	4-hydroxy-tetrahydrodipicolinate reductase	COG0289	Amino acid transport and metabolism
HPG27_RS02455	NC_011333.1	505725	505895	+	protein_coding	HPG27_RS02455	hypothetical protein	-	Unknown function
HPG27_RS02460	NC_011333.1	506148	507593	-	protein_coding	glnA	type I glutamate--ammonia ligase	COG0174	Amino acid transport and metabolism
HPG27_RS02465	NC_011333.1	507816	508112	+	protein_coding	HPG27_RS02465	hypothetical protein	-	Unknown function
HPG27_RS02470	NC_011333.1	508582	509031	+	protein_coding	rpl9,rplI	50S ribosomal protein L9	COG0359	Translation, ribosomal structure and biogenesis
HPG27_RS02475	NC_011333.1	509035	509577	+	protein_coding	hslV	HslU--HslV peptidase proteolytic subunit	COG5405	Posttranslational modification, protein turnover, chaperones
HPG27_RS02480	NC_011333.1	509577	510908	+	protein_coding	hslU	HslU--HslV peptidase ATPase subunit	COG1220	Posttranslational modification, protein turnover, chaperones
HPG27_RS02485	NC_011333.1	510905	511813	+	protein_coding	era	GTPase Era	COG1159	Translation, ribosomal structure and biogenesis
HPG27_RS02490	NC_011333.1	511810	512802	+	protein_coding	HPG27_RS02490	peptidase	COG3034	Cell wall/membrane/envelope biogenesis
HPG27_RS02495	NC_011333.1	512885	513739	-	protein_coding	HPG27_RS02495	hypothetical protein	COG0790	Signal transduction mechanisms
HPG27_RS02500	NC_011333.1	513910	514257	+	protein_coding	cag1	cag pathogenicity island protein Cag1	-	Unknown function
HPG27_RS02505	NC_011333.1	514365	514715	+	protein_coding	cag2	cag pathogenicity island protein	-	Unknown function
HPG27_RS02510	NC_011333.1	514715	516160	+	protein_coding	cag3,orf8	hypothetical protein	-	Unknown function
HPG27_RS02515	NC_011333.1	516165	516674	+	protein_coding	cag4	sodium:calcium antiporter	-	Unknown function
HPG27_RS02520	NC_011333.1	516793	519039	-	protein_coding	cag5	sodium:calcium antiporter	COG3505	Intracellular trafficking, secretion, and vesicular transport
HPG27_RS02525	NC_011333.1	519048	520040	-	protein_coding	virB11_1	P-type DNA transfer ATPase VirB11	COG0630	Intracellular trafficking, secretion, and vesicular transport
HPG27_RS02530	NC_011333.1	520045	520644	-	protein_coding	cagZ,cag6	sodium:calcium antiporter	-	Unknown function
HPG27_RS02540	NC_011333.1	526506	528071	-	protein_coding	cagX,cag8	sodium:calcium antiporter	COG3504	Intracellular trafficking, secretion, and vesicular transport
HPG27_RS02545	NC_011333.1	528123	529730	-	protein_coding	cagW,cag9	hypothetical protein	-	Unknown function
HPG27_RS02550	NC_011333.1	529735	530493	-	protein_coding	cagV,cag10	cag pathogenicity island protein	COG3736	Intracellular trafficking, secretion, and vesicular transport
HPG27_RS02555	NC_011333.1	530890	531540	+	protein_coding	cagU,cag11	hypothetical protein	-	Unknown function
HPG27_RS02560	NC_011333.1	531553	532395	+	protein_coding	cagT,cag12	cag pathogenicity island protein	-	Unknown function
HPG27_RS02565	NC_011333.1	532592	533191	-	protein_coding	cagS,cag13	hypothetical protein	-	Unknown function
HPG27_RS02570	NC_011333.1	533594	533965	-	protein_coding	tnpA	transposase	COG1943	Mobilome: prophages, transposons
HPG27_RS02580	NC_011333.1	535518	535898	-	protein_coding	cagQ,cag14	cag pathogenicity island protein	-	Unknown function
HPG27_RS02585	NC_011333.1	535835	536014	-	protein_coding	HPG27_RS02585	hypothetical protein	-	Unknown function
HPG27_RS02590	NC_011333.1	536330	536662	-	protein_coding	cagP,cag15	hypothetical protein	-	Unknown function
HPG27_RS02595	NC_011333.1	537100	538230	+	protein_coding	cagM,cag16	sodium:calcium antiporter	-	Unknown function
HPG27_RS02600	NC_011333.1	538245	539165	+	protein_coding	cagN,cag17	hypothetical protein	-	Unknown function
HPG27_RS02605	NC_011333.1	539247	539960	-	protein_coding	cagL,cag18	hypothetical protein	-	Unknown function
HPG27_RS02610	NC_011333.1	539957	541102	-	protein_coding	cagI,cag19	hypothetical protein	-	Unknown function
HPG27_RS02615	NC_011333.1	541113	542225	-	protein_coding	cagH,cag20	hypothetical protein	-	Unknown function
HPG27_RS02625	NC_011333.1	542241	542669	-	protein_coding	cagG,cag21	sodium:calcium antiporter	-	Unknown function
HPG27_RS02630	NC_011333.1	542724	543530	-	protein_coding	cagF,cag22	hypothetical protein	-	Unknown function
HPG27_RS02635	NC_011333.1	543532	546483	-	protein_coding	cagE,cag23	VirB4 family type IV secretion/conjugal transfer ATPase	COG3451	Intracellular trafficking, secretion, and vesicular transport
HPG27_RS02640	NC_011333.1	546492	547115	-	protein_coding	cagD,cag24	hypothetical protein	-	Unknown function
HPG27_RS02645	NC_011333.1	547117	547464	-	protein_coding	cagC,cag25	sodium:calcium antiporter	-	Unknown function
HPG27_RS02650	NC_011333.1	547609	547836	-	protein_coding	HPG27_RS02650	hypothetical protein	-	Unknown function
HPG27_RS02655	NC_011333.1	548263	551955	+	protein_coding	cagA,cag26	exotoxin CagA	-	Unknown function
HPG27_RS02660	NC_011333.1	552249	552584	+	protein_coding	HPG27_RS02660	helicase	COG1112	Replication, recombination and repair
HPG27_RS02665	NC_011333.1	552642	553409	-	protein_coding	murI,glr	glutamate racemase	COG0796	Cell wall/membrane/envelope biogenesis
HPG27_RS02670	NC_011333.1	553446	554762	-	protein_coding	rho	transcription termination factor Rho	COG1158	Transcription
HPG27_RS02675	NC_011333.1	555028	555231	+	protein_coding	rpl31,rpmE	50S ribosomal protein L31	COG0254	Translation, ribosomal structure and biogenesis
HPG27_RS02685	NC_011333.1	556130	556813	+	protein_coding	rimB	23S rRNA (guanosine(2251)-2'-O)-methyltransferase RlmB	COG0566	Translation, ribosomal structure and biogenesis
HPG27_RS02690	NC_011333.1	556826	557791	+	protein_coding	HPG27_RS02690	hypothetical protein	-	Unknown function
HPG27_RS02695	NC_011333.1	557788	558609	+	protein_coding	HPG27_RS02695	hypothetical protein	-	Unknown function
HPG27_RS02700	NC_011333.1	558678	559115	-	protein_coding	HPG27_RS02700	hypothetical protein	-	Unknown function
HPG27_RS02705	NC_011333.1	559583	560521	-	protein_coding	accA	acetyl-CoA carboxylase carboxyl transferase subunit alpha	COG0825	Lipid transport and metabolism
HPG27_RS02710	NC_011333.1	560544	561782	-	protein_coding	fabB,fabF	beta-ketoacyl-[acyl-carrier-protein] synthase II	COG0304	Secondary metabolites biosynthesis, transport and catabolism;Lipid transport and metabolism
HPG27_RS02715	NC_011333.1	562089	562325	-	protein_coding	acpP	acyl carrier protein	COG0236	Secondary metabolites biosynthesis, transport and catabolism;Lipid transport and metabolism
HPG27_RS02720	NC_011333.1	562555	563298	-	protein_coding	fabG	3-oxoacyl-[acyl-carrier-protein] reductase	COG1028	Secondary metabolites biosynthesis, transport and catabolism;Lipid transport and metabolism
HPG27_RS02725	NC_011333.1	563340	563552	-	protein_coding	rps21,rpsU	30S ribosomal protein S21	COG0828	Translation, ribosomal structure and biogenesis
HPG27_RS02730	NC_011333.1	563653	564903	-	protein_coding	HPG27_RS02730	hypothetical protein	-	Unknown function
HPG27_RS02735	NC_011333.1	565075	565320	+	protein_coding	HPG27_RS02735	hypothetical protein	-	Unknown function
HPG27_RS02740	NC_011333.1	565343	565990	-	protein_coding	ykgB	membrane protein	COG3059	Unknown function
HPG27_RS02745	NC_011333.1	566097	566915	-	protein_coding	dapF	diaminopimelate epimerase	COG0253	Amino acid transport and metabolism
HPG27_RS02750	NC_011333.1	567031	568077	+	protein_coding	HPG27_RS02750	AI-2E family transporter	COG0628	Unknown function
HPG27_RS02755	NC_011333.1	568209	568976	-	protein_coding	HPG27_RS02755	radical SAM protein	-	Unknown function
HPG27_RS02760	NC_011333.1	569120	570220	-	protein_coding	gtp1,ychF,engD	GTP-binding protein YchF	COG0012	Translation, ribosomal structure and biogenesis
HPG27_RS02765	NC_011333.1	570222	571712	-	protein_coding	pepA	cytosol aminopeptidase	COG0260	Amino acid transport and metabolism
HPG27_RS02770	NC_011333.1	571760	572338	-	protein_coding	HPG27_RS02770	membrane protein	COG0586	Unknown function
HPG27_RS02775	NC_011333.1	572353	572892	-	protein_coding	apt	adenine phosphoribosyltransferase	COG0503	Nucleotide transport and metabolism
HPG27_RS02780	NC_011333.1	572950	573282	-	protein_coding	HPG27_RS02780	hypothetical protein	-	Unknown function
HPG27_RS02785	NC_011333.1	573327	573788	-	protein_coding	rpi,lacA	ribose 5-phosphate isomerase B	COG0698	Carbohydrate transport and metabolism
HPG27_RS02790	NC_011333.1	573809	574507	-	protein_coding	HPG27_RS02790	site-2 protease family protein	COG1994	Posttranslational modification, protein turnover, chaperones
HPG27_RS02795	NC_011333.1	574516	575388	-	protein_coding	lepB	S26 family signal peptidase	COG0681	Intracellular trafficking, secretion, and vesicular transport
HPG27_RS02800	NC_011333.1	575388	576266	-	protein_coding	folD	bifunctional methylenetetrahydrofolate dehydrogenase/methenyltetrahydrofolate cyclohydrolase	COG0190	Coenzyme transport and metabolism
HPG27_RS02805	NC_011333.1	576339	578384	-	protein_coding	mdoB	phosphatidylglycerol--membrane-oligosaccharide glycerophosphotransferase	COG1368	Cell wall/membrane/envelope biogenesis
HPG27_RS02810	NC_011333.1	578390	578944	-	protein_coding	HPG27_RS02810	hypothetical protein	-	Unknown function
HPG27_RS02815	NC_011333.1	578951	580069	-	protein_coding	HPG27_RS02815	hypothetical protein	COG4692	Cell wall/membrane/envelope biogenesis;Carbohydrate transport and metabolism
HPG27_RS02820	NC_011333.1	580045	581064	-	protein_coding	pyrC2,pyrC	dihydroorotase	COG0418	Nucleotide transport and metabolism
HPG27_RS02830	NC_011333.1	582017	582913	-	protein_coding	HPG27_RS02830	hypothetical protein	-	Unknown function
HPG27_RS02835	NC_011333.1	582910	583281	-	protein_coding	fliN	flagellar motor switch protein FliN	COG1886	Intracellular trafficking, secretion, and vesicular transport;Cell motility
HPG27_RS02840	NC_011333.1	583363	584019	-	protein_coding	nth	endonuclease III	COG0177	Replication, recombination and repair
HPG27_RS02845	NC_011333.1	584016	584246	-	protein_coding	HPG27_RS02845	hypothetical protein	COG1918	Inorganic ion transport and metabolism
HPG27_RS02850	NC_011333.1	584248	587181	-	protein_coding	HPG27_RS02850	hypothetical protein	-	Unknown function
HPG27_RS02855	NC_011333.1	587099	588088	+	protein_coding	pabC	aminodeoxychorismate lyase	COG1559	Cell cycle control, cell division, chromosome partitioning
HPG27_RS02860	NC_011333.1	588273	588614	+	protein_coding	oorD	2-oxoglutarate:acceptor oxidoreductase	COG1146	Nucleotide transport and metabolism
HPG27_RS02865	NC_011333.1	588614	589741	+	protein_coding	oorA	2-oxoglutarate synthase subunit alpha	COG0674	Energy production and conversion
HPG27_RS02870	NC_011333.1	589744	590565	+	protein_coding	oorB	2-oxoglutarate ferredoxin oxidoreductase subunit beta	COG1013	Energy production and conversion
HPG27_RS02875	NC_011333.1	590565	591125	+	protein_coding	oorC	2-oxoglutarate:acceptor oxidoreductase	COG1014	Energy production and conversion
HPG27_RS02880	NC_011333.1	591222	594227	+	protein_coding	res	DEAD/DEAH box helicase	-	Unknown function
HPG27_RS02885	NC_011333.1	594224	596098	+	protein_coding	mod	DNA methyltransferase	COG2189	Replication, recombination and repair
HPG27_RS02890	NC_011333.1	596206	596370	+	protein_coding	HPG27_RS02890	hypothetical protein	-	Unknown function
HPG27_RS02895	NC_011333.1	596379	597851	+	protein_coding	HPG27_RS02895	disulfide bond formation protein B	COG1495	Posttranslational modification, protein turnover, chaperones
HPG27_RS02900	NC_011333.1	598326	598904	+	protein_coding	tip-alpha	tumor necrosis factor alpha-inducing protein	-	Unknown function
HPG27_RS02905	NC_011333.1	598907	600889	-	protein_coding	pbpA,PBP-1A	penicillin-binding protein 1A	COG0744	Cell wall/membrane/envelope biogenesis
HPG27_RS02910	NC_011333.1	600890	602011	-	protein_coding	bioF	8-amino-7-oxononanoate synthase	COG0156	Coenzyme transport and metabolism
HPG27_RS02915	NC_011333.1	602035	603336	-	protein_coding	mcpA	hemolysin	COG0840	Cell motility;Signal transduction mechanisms
HPG27_RS02925	NC_011333.1	605351	606883	+	protein_coding	flaA	flagellin A	COG1344	Cell motility
HPG27_RS02930	NC_011333.1	607011	607667	+	protein_coding	magIII	3-methyladenine DNA glycosylase	COG2231	Unknown function
HPG27_RS02935	NC_011333.1	607712	608281	+	protein_coding	HPG27_RS02935	hypothetical protein	-	Unknown function
HPG27_RS02940	NC_011333.1	608347	609369	+	protein_coding	hemE	uroporphyrinogen decarboxylase	COG0407	Coenzyme transport and metabolism
HPG27_RS02945	NC_011333.1	609379	610812	+	protein_coding	hefA	membrane protein	COG1538	Cell wall/membrane/envelope biogenesis
HPG27_RS02950	NC_011333.1	610822	611526	+	protein_coding	hefB,mtrC	membrane protein	COG0845	Defense mechanisms;Cell wall/membrane/envelope biogenesis
HPG27_RS02955	NC_011333.1	611539	614625	+	protein_coding	hefC,acrB	acriflavin resistance protein	COG0841	Defense mechanisms
HPG27_RS02960	NC_011333.1	614709	615191	+	protein_coding	HPG27_RS02960	hypothetical protein	-	Unknown function
HPG27_RS02965	NC_011333.1	615343	624921	+	protein_coding	faaA	toxin	COG5651	Unknown function
HPG27_RS02970	NC_011333.1	624980	625480	-	protein_coding	HPG27_RS02970	hypothetical protein	-	Unknown function
HPG27_RS02975	NC_011333.1	625497	625736	-	protein_coding	HPG27_RS02975	hypothetical protein	-	Unknown function
HPG27_RS02980	NC_011333.1	625736	626437	-	protein_coding	HPG27_RS02980	ABC transporter ATP-binding protein	COG1131	Defense mechanisms
HPG27_RS02985	NC_011333.1	626748	627083	-	protein_coding	HPG27_RS02985	hypothetical protein	-	Unknown function
HPG27_RS02990	NC_011333.1	627181	629157	-	protein_coding	lig,ligA	DNA ligase (NAD(+)) LigA	COG0272	Replication, recombination and repair
HPG27_RS02995	NC_011333.1	629236	630177	+	protein_coding	cheV2,cheV,cheV_2	chemotaxis protein CheV	COG0835	Cell motility;Signal transduction mechanisms
HPG27_RS03000	NC_011333.1	630212	631945	+	protein_coding	aspS	aspartate--tRNA ligase	COG0173	Translation, ribosomal structure and biogenesis
HPG27_RS03005	NC_011333.1	631962	632537	+	protein_coding	adk	adenylate kinase	COG0563	Nucleotide transport and metabolism
HPG27_RS03010	NC_011333.1	632562	633122	+	protein_coding	HPG27_RS03010	LPS biosynthesis protein	COG3306	Cell wall/membrane/envelope biogenesis
HPG27_RS03015	NC_011333.1	633061	633825	+	protein_coding	HPG27_RS03015	LPS biosynthesis protein	COG3306	Cell wall/membrane/envelope biogenesis
HPG27_RS03020	NC_011333.1	633877	634398	+	protein_coding	ppa	inorganic pyrophosphatase	COG0221	Energy production and conversion;Inorganic ion transport and metabolism
HPG27_RS03025	NC_011333.1	634540	636795	-	protein_coding	mutS	endonuclease MutS2	COG1193	Replication, recombination and repair
HPG27_RS03030	NC_011333.1	636788	637168	-	protein_coding	HPG27_RS03030	hypothetical protein	-	Unknown function
HPG27_RS03035	NC_011333.1	637168	638517	-	protein_coding	murC	UDP-N-acetylmuramate--L-alanine ligase	COG0773	Cell wall/membrane/envelope biogenesis
HPG27_RS03040	NC_011333.1	638510	639637	-	protein_coding	HPG27_RS03040	hypothetical protein	COG0436	Amino acid transport and metabolism
HPG27_RS03045	NC_011333.1	639757	640836	+	protein_coding	ispG,gcpE	4-hydroxy-3-methylbut-2-en-1-yl diphosphate synthase (flavodoxin)	COG0821	Lipid transport and metabolism
HPG27_RS03050	NC_011333.1	640839	642044	+	protein_coding	dapD	2,3,4,5-tetrahydropyridine-2,6-carboxylate N-succinyltransferase	COG2171	Amino acid transport and metabolism
HPG27_RS03055	NC_011333.1	642056	643114	+	protein_coding	hcpF	hypothetical protein	COG0790	Signal transduction mechanisms
HPG27_RS03060	NC_011333.1	643339	645384	+	protein_coding	HPG27_RS03060	hypothetical protein	COG1479	Unknown function
HPG27_RS03065	NC_011333.1	645428	646012	-	protein_coding	mdaB,mda66	NADPH quinone reductase MdaB	COG2249	Unknown function
HPG27_RS03070	NC_011333.1	646172	647326	+	protein_coding	hydA,hyaA	quinone-reactive Ni/Fe-hydrogenase small chain	COG1740	Energy production and conversion
HPG27_RS03075	NC_011333.1	647336	649072	+	protein_coding	hydB	hydrogenase 2 large subunit	COG0374	Energy production and conversion
HPG27_RS03080	NC_011333.1	649085	649759	+	protein_coding	hydC,hyaC	Ni/Fe-hydrogenase, b-type cytochrome subunit	COG1969	Energy production and conversion
HPG27_RS03085	NC_011333.1	649756	650292	+	protein_coding	hydD,hyaD	hydrogenase expression/formation protein	COG0680	Energy production and conversion
HPG27_RS03090	NC_011333.1	650294	651832	+	protein_coding	hydE	hypothetical protein	-	Unknown function
HPG27_RS03095	NC_011333.1	651837	652193	-	protein_coding	HPG27_RS03095	hypothetical protein	-	Unknown function
HPG27_RS03100	NC_011333.1	652268	652720	-	protein_coding	HPG27_RS03100	hypothetical protein	-	Unknown function
HPG27_RS03105	NC_011333.1	652914	653837	+	protein_coding	hopH,oipA,omp13	membrane protein	-	Unknown function
HPG27_RS03110	NC_011333.1	653883	654563	-	protein_coding	exsB,queC	7-cyano-7-deazaguanine synthase QueC	COG0603	Translation, ribosomal structure and biogenesis
HPG27_RS03115	NC_011333.1	654626	655834	+	protein_coding	pcnB,papS	poly(A) polymerase	COG0617	Translation, ribosomal structure and biogenesis
HPG27_RS03120	NC_011333.1	655848	656351	+	protein_coding	HPG27_RS03120	hypothetical protein	-	Unknown function
HPG27_RS03125	NC_011333.1	656366	657223	+	protein_coding	HPG27_RS03125	3-hydroxy acid dehydrogenase	COG2084	Lipid transport and metabolism
HPG27_RS03135	NC_011333.1	658041	659360	+	protein_coding	gltX2,gltX,gltX_2	glutamate--tRNA ligase 2	COG0008	Translation, ribosomal structure and biogenesis
HPG27_RS03140	NC_011333.1	659357	659650	+	protein_coding	HPG27_RS03140	YggT family protein	COG0762	Unknown function
HPG27_RS03145	NC_011333.1	659664	661346	+	protein_coding	slt	murein transglycosylase	COG0741	Cell wall/membrane/envelope biogenesis
HPG27_RS03150	NC_011333.1	661343	662164	+	protein_coding	galU	UTP--glucose-1-phosphate uridylyltransferase	COG1210	Cell wall/membrane/envelope biogenesis
HPG27_RS03155	NC_011333.1	662176	662583	+	protein_coding	HPG27_RS03155	hypothetical protein	-	Unknown function
HPG27_RS03160	NC_011333.1	662586	663854	+	protein_coding	murA,murZ	UDP-N-acetylglucosamine 1-carboxyvinyltransferase	COG0766	Cell wall/membrane/envelope biogenesis
HPG27_RS03165	NC_011333.1	663912	665318	+	protein_coding	aspA	aspartate ammonia-lyase	COG1027	Amino acid transport and metabolism
HPG27_RS03170	NC_011333.1	665363	665953	+	protein_coding	HPG27_RS03170	hypothetical protein	COG1573	Replication, recombination and repair
HPG27_RS03175	NC_011333.1	665962	667350	-	protein_coding	futB,fucTa	fucosyltransferase	-	Unknown function
HPG27_RS03180	NC_011333.1	667389	668012	-	protein_coding	serB	phosphoserine phosphatase SerB	COG0560	Amino acid transport and metabolism
HPG27_RS03185	NC_011333.1	668028	668531	-	protein_coding	pfr	non-heme ferritin	COG1528	Inorganic ion transport and metabolism
HPG27_RS03190	NC_011333.1	668828	669910	+	protein_coding	mqnE	aminofutalosine synthase MqnE	COG1060	Coenzyme transport and metabolism
HPG27_RS03195	NC_011333.1	669993	672743	+	protein_coding	BamA	outer membrane protein assembly factor BamA	COG4775	Cell wall/membrane/envelope biogenesis
HPG27_RS03200	NC_011333.1	672655	673806	+	protein_coding	HPG27_RS03200	dehypoxanthine futalosine cyclase	COG1060	Coenzyme transport and metabolism
HPG27_RS03205	NC_011333.1	673812	675116	+	protein_coding	ymxG	peptidase M16	COG0612	Unknown function
HPG27_RS03210	NC_011333.1	675113	676540	+	protein_coding	gatB	aspartyl/glutamyl-tRNA amidotransferase subunit B	COG0064	Translation, ribosomal structure and biogenesis
HPG27_RS03215	NC_011333.1	676540	677787	+	protein_coding	HPG27_RS03215	hypothetical protein	-	Unknown function
HPG27_RS03220	NC_011333.1	677799	678815	+	protein_coding	HPG27_RS03220	hypothetical protein	-	Unknown function
HPG27_RS03225	NC_011333.1	678802	679233	+	protein_coding	rnhA	ribonuclease HI	COG0328	Replication, recombination and repair
HPG27_RS03230	NC_011333.1	679242	679964	+	protein_coding	rnc	ribonuclease III	COG0571	Transcription
HPG27_RS03235	NC_011333.1	679961	681058	+	protein_coding	aroC	chorismate synthase	COG0082	Amino acid transport and metabolism
HPG27_RS03240	NC_011333.1	681096	681611	+	protein_coding	HPG27_RS03240	hypothetical protein	-	Unknown function
HPG27_RS03245	NC_011333.1	681611	682984	+	protein_coding	hemN1,hemN	oxygen-independent coproporphyrinogen III oxidase	COG0635	Coenzyme transport and metabolism
HPG27_RS03250	NC_011333.1	682981	684282	+	protein_coding	glpC	glycerol-3-phosphate dehydrogenase subunit C	COG0247	Energy production and conversion
HPG27_RS03265	NC_011333.1	689366	690178	+	protein_coding	horF,omp14	membrane protein	-	Unknown function
HPG27_RS03270	NC_011333.1	690337	691509	+	protein_coding	aspB	aspartate aminotransferase	COG0436	Amino acid transport and metabolism
HPG27_RS03275	NC_011333.1	691695	691982	+	protein_coding	HPG27_RS03275	hypothetical protein	-	Unknown function
HPG27_RS03280	NC_011333.1	691989	693080	+	protein_coding	xerC	integrase	-	Unknown function
HPG27_RS03285	NC_011333.1	693142	693648	-	protein_coding	ogt,dat1	methylated-DNA--protein-cysteine methyltransferase	COG0350	Replication, recombination and repair
HPG27_RS03290	NC_011333.1	693652	694419	-	protein_coding	HPG27_RS03290	anion permease	COG0730	Unknown function
HPG27_RS03295	NC_011333.1	694532	695479	-	protein_coding	wbpB	oxidoreductase	COG0673	Unknown function
HPG27_RS03300	NC_011333.1	695541	697907	-	protein_coding	nrdA	ribonucleoside-diphosphate reductase subunit alpha	COG0209	Nucleotide transport and metabolism
HPG27_RS03305	NC_011333.1	698100	698570	-	protein_coding	HPG27_RS03305	hypothetical protein	-	Unknown function
HPG27_RS03310	NC_011333.1	698594	698881	-	protein_coding	dvnA	hypothetical protein	-	Unknown function
HPG27_RS03315	NC_011333.1	699152	700453	-	protein_coding	glmU	bifunctional N-acetylglucosamine-1-phosphate uridyltransferase/glucosamine-1-phosphate acetyltransferase	COG1207	Cell wall/membrane/envelope biogenesis
HPG27_RS03320	NC_011333.1	700535	701281	+	protein_coding	fliP	flagellar biosynthetic protein FliP	COG1338	Cell motility
HPG27_RS03325	NC_011333.1	701320	703623	-	protein_coding	fecA1,fecA,fecA_1	ligand-gated channel	COG4772	Inorganic ion transport and metabolism
HPG27_RS03330	NC_011333.1	703884	705812	-	protein_coding	feoB	ferrous iron transporter B	COG0370	Inorganic ion transport and metabolism
HPG27_RS03335	NC_011333.1	705951	706763	+	protein_coding	HPG27_RS03335	hypothetical protein	COG3298	Replication, recombination and repair
HPG27_RS03340	NC_011333.1	707044	708219	+	protein_coding	phbA,fadA	acetyl-CoA acetyltransferase	COG0183	Lipid transport and metabolism
HPG27_RS03345	NC_011333.1	708230	708928	+	protein_coding	scoA,yxjD	succinyl-CoA--3-ketoacid-CoA transferase	COG1788	Lipid transport and metabolism
HPG27_RS03350	NC_011333.1	708925	709548	+	protein_coding	scoB,yxjE	succinyl-CoA--3-ketoacid-CoA transferase	COG2057	Lipid transport and metabolism
HPG27_RS03355	NC_011333.1	709568	710932	+	protein_coding	atoE	short-chain fatty acid transporter	COG2031	Lipid transport and metabolism
HPG27_RS03360	NC_011333.1	711060	712070	+	protein_coding	HPG27_RS03360	membrane protein	COG3528	Unknown function
HPG27_RS03370	NC_011333.1	714441	716738	+	protein_coding	HPG27_RS03370	acetone carboxylase subunit alpha	COG0146	Secondary metabolites biosynthesis, transport and catabolism;Amino acid transport and metabolism
HPG27_RS03375	NC_011333.1	716749	717255	+	protein_coding	HPG27_RS03375	acetone carboxylase subunit gamma	COG4647	Secondary metabolites biosynthesis, transport and catabolism
HPG27_RS03380	NC_011333.1	717454	717645	+	protein_coding	HPG27_RS03380	hypothetical protein	-	Unknown function
HPG27_RS03385	NC_011333.1	717657	718685	+	protein_coding	HPG27_RS03385	hypothetical protein	-	Unknown function
HPG27_RS03390	NC_011333.1	718678	719064	+	protein_coding	dgkA	diacylglycerol kinase	COG0818	Lipid transport and metabolism
HPG27_RS03395	NC_011333.1	719084	721585	+	protein_coding	gyrA	DNA gyrase subunit A	COG0188	Replication, recombination and repair
HPG27_RS03400	NC_011333.1	721582	722058	+	protein_coding	HPG27_RS03400	hypothetical protein	-	Unknown function
HPG27_RS03405	NC_011333.1	722055	723200	+	protein_coding	flgR	ATPase AAA	COG2204	Signal transduction mechanisms
HPG27_RS03410	NC_011333.1	723373	723639	+	protein_coding	HPG27_RS03410	hypothetical protein	-	Unknown function
HPG27_RS03425	NC_011333.1	727514	728335	+	protein_coding	hopE,omp15	membrane protein	-	Unknown function
HPG27_RS03430	NC_011333.1	728515	729441	+	protein_coding	mraW	ribosomal RNA small subunit methyltransferase H	COG0275	Translation, ribosomal structure and biogenesis
HPG27_RS03435	NC_011333.1	729462	729806	+	protein_coding	HPG27_RS03435	hypothetical protein	-	Unknown function
HPG27_RS03440	NC_011333.1	730009	730911	+	protein_coding	HPG27_RS03440	acetolactate synthase	COG1912	Coenzyme transport and metabolism
HPG27_RS03450	NC_011333.1	733359	734579	+	protein_coding	ComGF	competence protein ComGF	COG4940	Mobilome: prophages, transposons;Nucleotide transport and metabolism
HPG27_RS03455	NC_011333.1	734673	735284	+	protein_coding	HPG27_RS03455	Fic family protein	COG3177	Transcription
HPG27_RS03460	NC_011333.1	735296	736540	-	protein_coding	rpoN	RNA polymerase sigma-54 factor	COG1508	Transcription
HPG27_RS03465	NC_011333.1	736543	737265	-	protein_coding	HPG27_RS03465	ABC transporter ATP-binding protein	COG1137	Cell wall/membrane/envelope biogenesis
HPG27_RS03470	NC_011333.1	737278	737679	-	protein_coding	HPG27_RS03470	tRNA (adenosine(37)-N6)-threonylcarbamoyltransferase complex ATPase subunit type 1 TsaE	-	Unknown function
HPG27_RS03480	NC_011333.1	739467	740099	-	protein_coding	lysE	hypothetical protein	COG1279	Amino acid transport and metabolism
HPG27_RS03485	NC_011333.1	740367	740789	+	protein_coding	HPG27_RS03485	hypothetical protein	-	Unknown function
HPG27_RS03490	NC_011333.1	740818	741279	+	protein_coding	HPG27_RS03490	zinc ABC transporter substrate-binding protein	-	Unknown function
HPG27_RS03495	NC_011333.1	741711	743513	+	protein_coding	hopO,omp16	hypothetical protein	-	Unknown function
HPG27_RS03500	NC_011333.1	743589	744920	-	protein_coding	HPG27_RS03500	C4-dicarboxylate ABC transporter	COG2704	Carbohydrate transport and metabolism
HPG27_RS03505	NC_011333.1	744997	746049	+	protein_coding	ansB	L-asparaginase	COG0252	Intracellular trafficking, secretion, and vesicular transport;Translation, ribosomal structure and biogenesis
HPG27_RS03510	NC_011333.1	746189	748030	-	protein_coding	hopP,omp17	hypothetical protein	-	Unknown function
HPG27_RS03515	NC_011333.1	748365	749282	-	protein_coding	HPG27_RS03515	hypothetical protein	-	Unknown function
HPG27_RS03520	NC_011333.1	749252	750238	-	protein_coding	HPG27_RS03520	tRNA-dihydrouridine synthase	COG0042	Translation, ribosomal structure and biogenesis
HPG27_RS03525	NC_011333.1	750329	751345	-	protein_coding	HPG27_RS03525	tRNA(Ile)-lysidine synthetase	COG0037	Translation, ribosomal structure and biogenesis
HPG27_RS03530	NC_011333.1	751381	752415	-	protein_coding	HPG27_RS03530	hypothetical protein	-	Unknown function
HPG27_RS03535	NC_011333.1	752424	752729	-	protein_coding	HPG27_RS03535	hypothetical protein	-	Unknown function
HPG27_RS03540	NC_011333.1	752839	753741	-	protein_coding	leoA	dynactin subunit 1	-	Unknown function
HPG27_RS03545	NC_011333.1	753954	754325	-	protein_coding	tnpA	transposase	COG1943	Mobilome: prophages, transposons
HPG27_RS03550	NC_011333.1	754395	755678	+	protein_coding	tnpB	transposase	COG0675	Mobilome: prophages, transposons
HPG27_RS03555	NC_011333.1	755691	756488	-	protein_coding	leoA2	hypothetical protein	-	Unknown function
HPG27_RS03570	NC_011333.1	758447	759766	-	protein_coding	rimO	30S ribosomal protein S12 methylthiotransferase RimO	COG0621	Translation, ribosomal structure and biogenesis
HPG27_RS03575	NC_011333.1	759768	760229	-	protein_coding	gpt	nicotinate phosphoribosyltransferase	COG2236	Coenzyme transport and metabolism
HPG27_RS03580	NC_011333.1	760238	761347	-	protein_coding	serC	aminotransferase	COG0075	Nucleotide transport and metabolism;Amino acid transport and metabolism
HPG27_RS03585	NC_011333.1	761496	761972	+	protein_coding	pgpA	phosphatidylglycerophosphatase A	COG1267	Lipid transport and metabolism
HPG27_RS03590	NC_011333.1	762050	763093	+	protein_coding	ddl,ddlA	D-alanine--D-alanine ligase A	COG1181	Cell wall/membrane/envelope biogenesis
HPG27_RS03595	NC_011333.1	763093	763818	+	protein_coding	estV	2-hydroxy-6-oxohepta-2,4-dienoate hydrolase	COG0596	Coenzyme transport and metabolism
HPG27_RS03600	NC_011333.1	763805	765286	+	protein_coding	murF	UDP-MurNac-pentapeptide presynthetase MurF	COG0770	Cell wall/membrane/envelope biogenesis
HPG27_RS03605	NC_011333.1	765296	765781	+	protein_coding	HPG27_RS03605	hydrolase	COG0537	Carbohydrate transport and metabolism;Nucleotide transport and metabolism
HPG27_RS03610	NC_011333.1	765846	766802	+	protein_coding	prsA	ribose-phosphate pyrophosphokinase	COG0462	Amino acid transport and metabolism;Nucleotide transport and metabolism
HPG27_RS03625	NC_011333.1	769070	770053	+	protein_coding	rluD2,rluD_2	RNA pseudouridine synthase	COG0564	Translation, ribosomal structure and biogenesis
HPG27_RS03630	NC_011333.1	770004	771263	+	protein_coding	HPG27_RS03630	hypothetical protein	COG3401	Unknown function
HPG27_RS03635	NC_011333.1	771274	772455	+	protein_coding	trmB	tRNA (guanine(46)-N(7))-methyltransferase	COG0220	Translation, ribosomal structure and biogenesis
HPG27_RS03640	NC_011333.1	772452	773123	+	protein_coding	ftsE	ABC transporter ATP-binding protein	COG1136	Cell wall/membrane/envelope biogenesis
HPG27_RS03645	NC_011333.1	773110	773916	+	protein_coding	ftsX	hypothetical protein	-	Unknown function
HPG27_RS03650	NC_011333.1	773909	775111	+	protein_coding	HPG27_RS03650	hypothetical protein	COG0739	Cell wall/membrane/envelope biogenesis
HPG27_RS03655	NC_011333.1	775204	775563	+	protein_coding	flaG	flagellar protein FlaG	COG1334	Unknown function
HPG27_RS03665	NC_011333.1	777679	778059	+	protein_coding	fliS	flagellar protein FliS	COG1516	Cell motility;Intracellular trafficking, secretion, and vesicular transport
HPG27_RS03670	NC_011333.1	778046	778285	+	protein_coding	FliT	hypothetical protein	-	Unknown function
HPG27_RS03675	NC_011333.1	778378	779013	+	protein_coding	moeB	tRNA threonylcarbamoyladenosine dehydratase	COG1179	Translation, ribosomal structure and biogenesis
HPG27_RS03680	NC_011333.1	779015	779161	+	protein_coding	HPG27_RS03680	hypothetical protein	-	Unknown function
HPG27_RS03685	NC_011333.1	779165	780043	+	protein_coding	HPG27_RS03685	apolipoprotein acyltransferase	COG0388	Unknown function
HPG27_RS03690	NC_011333.1	780170	781483	+	protein_coding	HPG27_RS03690	sodium:proton antiporter	COG2056	Amino acid transport and metabolism
HPG27_RS03695	NC_011333.1	781501	782799	+	protein_coding	norM,dinF	MATE family efflux transporter	COG0534	Defense mechanisms
HPG27_RS03700	NC_011333.1	782800	784389	-	protein_coding	HPG27_RS03700	ribonuclease Y	COG1418	Translation, ribosomal structure and biogenesis
HPG27_RS03705	NC_011333.1	784289	784957	-	protein_coding	HPG27_RS03705	5-formyltetrahydrofolate cyclo-ligase	COG0212	Coenzyme transport and metabolism
HPG27_RS03710	NC_011333.1	785055	785612	+	protein_coding	HPG27_RS03710	hypothetical protein	-	Unknown function
HPG27_RS03715	NC_011333.1	785619	786500	+	protein_coding	ftsY	signal recognition particle-docking protein FtsY	COG0552	Intracellular trafficking, secretion, and vesicular transport
HPG27_RS03730	NC_011333.1	787865	788155	-	protein_coding	HPG27_RS03730	hypothetical protein	-	Unknown function
HPG27_RS03735	NC_011333.1	788162	789358	-	protein_coding	HPG27_RS03735	hypothetical protein	-	Unknown function
HPG27_RS03745	NC_011333.1	789660	790625	-	protein_coding	moaA	GTP 3',8-cyclase MoaA	COG2896	Coenzyme transport and metabolism
HPG27_RS03750	NC_011333.1	790712	791317	+	protein_coding	mobA	molybdenum cofactor guanylyltransferase	COG0746	Coenzyme transport and metabolism
HPG27_RS03755	NC_011333.1	791310	792386	+	protein_coding	flhB	flagellar biosynthesis protein FlhB	COG1377	Cell motility
HPG27_RS03760	NC_011333.1	792476	793213	-	protein_coding	HPG27_RS03760	hypothetical protein	-	Unknown function
HPG27_RS03765	NC_011333.1	793232	794530	-	protein_coding	amiA	N-acetylmuramoyl-L-alanine amidase	COG0860	Cell wall/membrane/envelope biogenesis
HPG27_RS03770	NC_011333.1	794537	795628	-	protein_coding	HPG27_RS03770	nitronate monooxygenase	COG2070	Unknown function
HPG27_RS03775	NC_011333.1	795645	796853	-	protein_coding	tyrS	tyrosine--tRNA ligase	COG0162	Translation, ribosomal structure and biogenesis
HPG27_RS03780	NC_011333.1	796873	799203	-	protein_coding	spoT	penta-phosphate guanosine-3'-pyrophosphohydrolase (spoT)	COG0317	Transcription;Signal transduction mechanisms
HPG27_RS03785	NC_011333.1	799190	799444	-	protein_coding	rpoZ	DNA-directed RNA polymerase subunit omega	COG1758	Transcription
HPG27_RS03790	NC_011333.1	799456	800178	-	protein_coding	pyrH	UMP kinase	COG0528	Nucleotide transport and metabolism
HPG27_RS03795	NC_011333.1	800279	800962	-	protein_coding	HPG27_RS03795	hypothetical protein	COG1427	Unknown function
HPG27_RS03800	NC_011333.1	801089	803650	+	protein_coding	acnB	bifunctional aconitate hydratase 2/2-methylisocitrate dehydratase	COG1049	Energy production and conversion
HPG27_RS03805	NC_011333.1	803725	803997	+	protein_coding	HPG27_RS03805	hypothetical protein	-	Unknown function
HPG27_RS03810	NC_011333.1	804277	805575	+	protein_coding	HPG27_RS03810	DDE transposase	COG5659	Mobilome: prophages, transposons
HPG27_RS03815	NC_011333.1	805668	807035	+	protein_coding	hofE	membrane protein	-	Unknown function
HPG27_RS03820	NC_011333.1	807042	807569	-	protein_coding	HPG27_RS03820	hypothetical protein	-	Unknown function
HPG27_RS03830	NC_011333.1	808053	808607	-	protein_coding	lolA	outer-membrane lipoprotein carrier protein	COG2834	Cell wall/membrane/envelope biogenesis
HPG27_RS03835	NC_011333.1	808753	811350	+	protein_coding	secA	protein translocase subunit SecA	COG0653	Intracellular trafficking, secretion, and vesicular transport
HPG27_RS03840	NC_011333.1	811340	812572	+	protein_coding	lolC	ABC transporter permease	COG4591	Cell wall/membrane/envelope biogenesis
HPG27_RS03845	NC_011333.1	812854	814353	+	protein_coding	hofF	membrane protein	-	Unknown function
HPG27_RS03855	NC_011333.1	814589	815893	-	protein_coding	hsdS5,hsdS_5,prrB	hypothetical protein	COG0732	Defense mechanisms
HPG27_RS03860	NC_011333.1	815934	817994	-	protein_coding	cadA,hmcT	cadmium-translocating P-type ATPase	COG2217	Inorganic ion transport and metabolism
HPG27_RS03865	NC_011333.1	818019	819539	-	protein_coding	HPG27_RS03865	Fis family transcriptional regulator	COG0606	Posttranslational modification, protein turnover, chaperones
HPG27_RS03870	NC_011333.1	819545	820069	-	protein_coding	def	peptide deformylase	COG0242	Translation, ribosomal structure and biogenesis
HPG27_RS03875	NC_011333.1	820074	820664	-	protein_coding	clpP	ATP-dependent Clp protease proteolytic subunit	COG0740	Posttranslational modification, protein turnover, chaperones
HPG27_RS03880	NC_011333.1	820682	822037	-	protein_coding	tig	trigger factor	COG0544	Posttranslational modification, protein turnover, chaperones
HPG27_RS03885	NC_011333.1	822144	822980	-	protein_coding	horG,omp18	membrane protein	-	Unknown function
HPG27_RS03890	NC_011333.1	823009	823791	-	protein_coding	hpaA	neuraminyllactose-binding hemagglutinin	-	Unknown function
HPG27_RS03895	NC_011333.1	823910	824386	-	protein_coding	moaC	cyclic pyranopterin monophosphate synthase MoaC	COG0315	Coenzyme transport and metabolism
HPG27_RS03900	NC_011333.1	824395	824925	-	protein_coding	mog,mogA	molybdopterin adenylyltransferase	COG0521	Coenzyme transport and metabolism
HPG27_RS03905	NC_011333.1	824938	825375	-	protein_coding	moaE	molybdenum cofactor biosynthesis protein MoaE	COG0314	Coenzyme transport and metabolism
HPG27_RS03910	NC_011333.1	825376	825600	-	protein_coding	moaD	molybdopterin synthase sulfur carrier subunit	COG1977	Coenzyme transport and metabolism
HPG27_RS03915	NC_011333.1	825673	826251	-	protein_coding	ribA	GTP cyclohydrolase II	COG0807	Coenzyme transport and metabolism
HPG27_RS03920	NC_011333.1	826341	827180	-	protein_coding	HPG27_RS03920	ubiquitin--protein ligase	-	Unknown function
HPG27_RS03925	NC_011333.1	827269	828303	-	protein_coding	ribBA	3,4-dihydroxy-2-butanone-4-phosphate synthase	COG0807	Coenzyme transport and metabolism
HPG27_RS03930	NC_011333.1	828484	829338	-	protein_coding	lex2B	lipooligosaccharide 5G8 epitope biosynthesis-associated protein (lex2B)	COG3306	Cell wall/membrane/envelope biogenesis
HPG27_RS03935	NC_011333.1	829420	830040	+	protein_coding	HPG27_RS03935	metalloprotease	COG1451	Unknown function
HPG27_RS03945	NC_011333.1	832637	832996	-	protein_coding	acpS	holo-ACP synthase	COG0736	Lipid transport and metabolism
HPG27_RS03950	NC_011333.1	833003	833554	-	protein_coding	fliL	flagellar basal body protein FliL	COG1580	Cell motility
HPG27_RS03955	NC_011333.1	833563	834165	-	protein_coding	rsmD	16S rRNA (guanine(966)-N(2))-methyltransferase RsmD	COG0742	Translation, ribosomal structure and biogenesis
HPG27_RS03960	NC_011333.1	834144	834470	-	protein_coding	HPG27_RS03960	hypothetical protein	-	Unknown function
HPG27_RS03965	NC_011333.1	834821	835831	-	protein_coding	HPG27_RS03965	SAM-dependent methyltransferase	COG1565	Unknown function
HPG27_RS03970	NC_011333.1	835963	836580	+	protein_coding	HPG27_RS03970	MBL fold hydrolase	COG0491	Unknown function
HPG27_RS03975	NC_011333.1	836581	837348	+	protein_coding	moeB,thiF	thiamin biosynthesis protein (thiF)	COG0476	Coenzyme transport and metabolism
HPG27_RS03980	NC_011333.1	837364	838137	+	protein_coding	motA	motility protein A	COG1291	Cell motility
HPG27_RS03985	NC_011333.1	838140	838913	+	protein_coding	motB	flagellar motor protein MotB	COG1360	Cell motility
HPG27_RS03990	NC_011333.1	838910	839356	+	protein_coding	HPG27_RS03990	hypothetical protein	-	Unknown function
HPG27_RS03995	NC_011333.1	839425	839817	+	protein_coding	proWX	osmoprotection protein	-	Unknown function
HPG27_RS04000	NC_011333.1	839786	840358	-	protein_coding	HPG27_RS04000	endonuclease	-	Unknown function
HPG27_RS04005	NC_011333.1	840352	841170	-	protein_coding	HPG27_RS04005	site-specific DNA-methyltransferase	COG0863	Replication, recombination and repair
HPG27_RS04010	NC_011333.1	841421	843082	+	protein_coding	proWX	osmoprotection protein (proWX)	COG1732	Cell wall/membrane/envelope biogenesis;Amino acid transport and metabolism
HPG27_RS04015	NC_011333.1	843086	843727	+	protein_coding	proV	osmoprotection protein (proV)	-	Unknown function
HPG27_RS04020	NC_011333.1	843739	843918	-	protein_coding	HPG27_RS04020	hypothetical protein	-	Unknown function
HPG27_RS04025	NC_011333.1	843910	844371	+	protein_coding	HPG27_RS04025	hypothetical protein	-	Unknown function
HPG27_RS04030	NC_011333.1	844372	846156	+	protein_coding	uvrC	UvrABC system protein C	COG0322	Replication, recombination and repair
HPG27_RS04035	NC_011333.1	846167	847432	+	protein_coding	hom,metL	homoserine dehydrogenase	COG0460	Amino acid transport and metabolism
HPG27_RS04040	NC_011333.1	847433	847777	+	protein_coding	HPG27_RS04040	hypothetical protein	COG0792	Replication, recombination and repair
HPG27_RS04045	NC_011333.1	847866	848186	+	protein_coding	trx1,trxA	thiol reductase thioredoxin	-	Unknown function
HPG27_RS04050	NC_011333.1	848192	849127	+	protein_coding	trxR1,trxB	thioredoxin-disulfide reductase	COG0492	Posttranslational modification, protein turnover, chaperones
HPG27_RS04055	NC_011333.1	849336	850157	+	protein_coding	beta4-galT,lex2B	lipooligosaccharide 5G8 epitope biosynthesis-associated protein (lex2B)	COG3306	Cell wall/membrane/envelope biogenesis
HPG27_RS04060	NC_011333.1	850380	850628	-	protein_coding	HPG27_RS04060	RNA-binding protein	COG0724	Translation, ribosomal structure and biogenesis
HPG27_RS04065	NC_011333.1	850949	851629	-	protein_coding	atpB	ATP synthase subunit A	COG0356	Energy production and conversion
HPG27_RS04070	NC_011333.1	851751	853196	-	protein_coding	guaB	IMP dehydrogenase	COG0517	Signal transduction mechanisms;Nucleotide transport and metabolism
HPG27_RS04075	NC_011333.1	853206	854567	-	protein_coding	gatA	glutamyl-tRNA(Gln) amidotransferase subunit A	COG0154	Translation, ribosomal structure and biogenesis
HPG27_RS04080	NC_011333.1	854626	855216	-	protein_coding	coaE	dephospho-CoA kinase	COG0237	Coenzyme transport and metabolism
HPG27_RS04085	NC_011333.1	855218	856006	-	protein_coding	speE	polyamine aminopropyltransferase	COG0421	Amino acid transport and metabolism
HPG27_RS04090	NC_011333.1	856098	856976	-	protein_coding	HPG27_RS04090	hypothetical protein	-	Unknown function
HPG27_RS04095	NC_011333.1	857053	858435	+	protein_coding	engA,der	ribosome biogenesis GTPase Der	COG1160	Unknown function
HPG27_RS04100	NC_011333.1	858578	858862	+	protein_coding	hup	DNA-binding protein	COG0776	Replication, recombination and repair
HPG27_RS04110	NC_011333.1	859461	860066	+	protein_coding	HPG27_RS04110	hypothetical protein	-	Unknown function
HPG27_RS04115	NC_011333.1	860086	860703	+	protein_coding	HPG27_RS04115	hypothetical protein	-	Unknown function
HPG27_RS04120	NC_011333.1	860700	862463	+	protein_coding	ompP1	membrane protein	COG2067	Lipid transport and metabolism
HPG27_RS04125	NC_011333.1	862467	863468	+	protein_coding	flaA1	UDP-N-acetylglucosamine 4,6-dehydratase (inverting)	COG1086	Cell wall/membrane/envelope biogenesis;Posttranslational modification, protein turnover, chaperones
HPG27_RS04130	NC_011333.1	863465	864742	+	protein_coding	dfp	phosphopantothenate synthase	COG0452	Coenzyme transport and metabolism
HPG27_RS04135	NC_011333.1	864742	865479	+	protein_coding	HPG27_RS04135	hypothetical protein	-	Unknown function
HPG27_RS04140	NC_011333.1	865511	866173	-	protein_coding	thiE,thiB	thiamine phosphate synthase	COG0352	Coenzyme transport and metabolism
HPG27_RS04145	NC_011333.1	866166	866978	-	protein_coding	thiD,thi	bifunctional hydroxymethylpyrimidine kinase/phosphomethylpyrimidine kinase	COG0351	Coenzyme transport and metabolism
HPG27_RS04150	NC_011333.1	866972	867751	-	protein_coding	thiM	hydroxyethylthiazole kinase	COG2145	Coenzyme transport and metabolism
HPG27_RS04155	NC_011333.1	867840	870830	-	protein_coding	hsdR2,hsdR	DEAD/DEAH box helicase	COG0610	Defense mechanisms
HPG27_RS04160	NC_011333.1	870967	872256	-	protein_coding	hsdS5,hsdS_5,prrB	hypothetical protein	COG0732	Defense mechanisms
HPG27_RS04165	NC_011333.1	872266	873861	-	protein_coding	hsdM2,hsdM,hsdM_2	type I restriction-modification system subunit M	COG0286	Defense mechanisms
HPG27_RS04170	NC_011333.1	874035	874718	+	protein_coding	HPG27_RS04170	phosphatase PAP2 family protein	COG0671	Lipid transport and metabolism
HPG27_RS04175	NC_011333.1	874947	875879	-	protein_coding	HPG27_RS04175	hypothetical protein	COG2958	Unknown function
HPG27_RS04180	NC_011333.1	875876	877477	-	protein_coding	yheS	ABC transporter ATP-binding protein	COG0488	Unknown function
HPG27_RS04185	NC_011333.1	877666	878652	+	protein_coding	guaC	GMP reductase	COG0516	Nucleotide transport and metabolism
HPG27_RS04190	NC_011333.1	878808	879386	-	protein_coding	gmhA	phosphoheptose isomerase	COG0279	Carbohydrate transport and metabolism
HPG27_RS04195	NC_011333.1	879379	880770	-	protein_coding	rfaE,hldE	bifunctional heptose 7-phosphate kinase/heptose 1-phosphate adenyltransferase	COG2870	Cell wall/membrane/envelope biogenesis
HPG27_RS04200	NC_011333.1	880767	881759	-	protein_coding	rfaD	ADP-glyceromanno-heptose 6-epimerase	COG0451	Cell wall/membrane/envelope biogenesis
HPG27_RS04205	NC_011333.1	881768	882289	-	protein_coding	HPG27_RS04205	D-glycero-beta-D-manno-heptose 1,7-bisphosphate 7-phosphatase	COG0241	Amino acid transport and metabolism
HPG27_RS04210	NC_011333.1	882279	883019	-	protein_coding	HPG27_RS04210	hypothetical protein	COG2836	Inorganic ion transport and metabolism
HPG27_RS04215	NC_011333.1	883010	883681	-	protein_coding	HPG27_RS04215	type III pantothenate kinase	COG1521	Coenzyme transport and metabolism
HPG27_RS04220	NC_011333.1	883686	885353	-	protein_coding	pgbB	hypothetical protein	-	Unknown function
HPG27_RS04225	NC_011333.1	885358	886014	-	protein_coding	HPG27_RS04225	hypothetical protein	-	Unknown function
HPG27_RS04230	NC_011333.1	886011	886448	-	protein_coding	dut	deoxyuridine 5'-triphosphate nucleotidohydrolase	COG0756	Defense mechanisms;Nucleotide transport and metabolism
HPG27_RS04235	NC_011333.1	886438	886932	-	protein_coding	greA	transcription elongation factor GreA	COG0782	Transcription
HPG27_RS04240	NC_011333.1	886973	888055	-	protein_coding	lpxB	lipid-A-disaccharide synthase	COG0763	Cell wall/membrane/envelope biogenesis
HPG27_RS04245	NC_011333.1	888055	888516	-	protein_coding	mua	hypothetical protein	-	Unknown function
HPG27_RS04250	NC_011333.1	888523	888876	-	protein_coding	hypA	hydrogenase/urease nickel incorporation protein HypA	COG0375	Unknown function
HPG27_RS04255	NC_011333.1	888935	891091	-	protein_coding	flgE	flagellar hook protein FlgE	COG1749	Cell motility
HPG27_RS04260	NC_011333.1	891300	892034	-	protein_coding	speE,cdh	CDP-diacylglycerol diphosphatase	COG2134	Lipid transport and metabolism
HPG27_RS04265	NC_011333.1	892387	892716	+	protein_coding	phnA	hypothetical protein	COG2824	Transcription
HPG27_RS04270	NC_011333.1	892768	892983	-	protein_coding	HPG27_RS04270	hypothetical protein	-	Unknown function
HPG27_RS04275	NC_011333.1	893068	893943	-	protein_coding	kapA	Tat pathway signal protein	-	Unknown function
HPG27_RS04280	NC_011333.1	894088	895605	-	protein_coding	katA	catalase	COG0753	Inorganic ion transport and metabolism
HPG27_RS04285	NC_011333.1	895928	898303	+	protein_coding	frpB1,frpB	membrane protein	COG1629	Inorganic ion transport and metabolism
HPG27_RS04290	NC_011333.1	898304	898777	-	protein_coding	ruvC	crossover junction endodeoxyribonuclease RuvC	COG0817	Replication, recombination and repair
HPG27_RS04295	NC_011333.1	899044	899634	+	protein_coding	HPG27_RS04295	nuclease	COG1432	Unknown function
HPG27_RS04300	NC_011333.1	899788	899976	-	protein_coding	HPG27_RS04300	hypothetical protein	-	Unknown function
HPG27_RS04305	NC_011333.1	900121	900318	-	protein_coding	HPG27_RS04305	hypothetical protein	-	Unknown function
HPG27_RS04310	NC_011333.1	900797	901348	-	protein_coding	ruvA	Holliday junction branch migration protein RuvA	COG0632	Replication, recombination and repair
HPG27_RS04315	NC_011333.1	901374	903218	-	protein_coding	HPG27_RS04315	hypothetical protein	-	Unknown function
HPG27_RS04320	NC_011333.1	903311	904771	+	protein_coding	mviN,murJ	lipid II flippase MurJ	COG0728	Cell wall/membrane/envelope biogenesis
HPG27_RS04325	NC_011333.1	904772	906169	+	protein_coding	cysS	cysteine--tRNA ligase	COG0215	Translation, ribosomal structure and biogenesis
HPG27_RS04330	NC_011333.1	906393	910277	+	protein_coding	vacA	autotransporter domain-containing protein	-	Unknown function
HPG27_RS04335	NC_011333.1	910336	911103	-	protein_coding	fecE	iron chelating transport ATP-binding protein	COG1120	Coenzyme transport and metabolism;Inorganic ion transport and metabolism
HPG27_RS04340	NC_011333.1	911103	912083	-	protein_coding	fecD	iron chelating ABC transporter permease	COG0609	Inorganic ion transport and metabolism
HPG27_RS04345	NC_011333.1	912076	912888	-	protein_coding	vdlC	short-chain dehydrogenase/reductase	-	Unknown function
HPG27_RS04350	NC_011333.1	913070	913594	+	protein_coding	vdlD	acyl-CoA thioesterase	COG1607	Lipid transport and metabolism
HPG27_RS04360	NC_011333.1	913958	914269	-	protein_coding	HPG27_RS04360	hypothetical protein	-	Unknown function
HPG27_RS04365	NC_011333.1	914347	914613	-	protein_coding	HPG27_RS04365	YafQ family addiction module toxin	COG3041	Translation, ribosomal structure and biogenesis
HPG27_RS04370	NC_011333.1	914600	914971	-	protein_coding	HPG27_RS04370	hypothetical protein	-	Unknown function
HPG27_RS04375	NC_011333.1	915374	917596	-	protein_coding	hopU,omp9	membrane protein	-	Unknown function
HPG27_RS04380	NC_011333.1	917595	917801	+	protein_coding	HPG27_RS04380	hypothetical protein	-	Unknown function
HPG27_RS04395	NC_011333.1	918088	918609	+	protein_coding	HPG27_RS04395	hypothetical protein	-	Unknown function
HPG27_RS04400	NC_011333.1	918560	919672	-	protein_coding	hypD	hydrogenase formation protein HypD	COG0409	Posttranslational modification, protein turnover, chaperones
HPG27_RS04405	NC_011333.1	919678	919911	-	protein_coding	hypC,hupF	hydrogenase assembly protein HupF	COG0298	Posttranslational modification, protein turnover, chaperones
HPG27_RS04410	NC_011333.1	919911	920639	-	protein_coding	hypB	hydrogenase/urease nickel incorporation protein HypB	COG0378	Posttranslational modification, protein turnover, chaperones
HPG27_RS04415	NC_011333.1	920749	920874	-	protein_coding	HPG27_RS04415	hypothetical protein	-	Unknown function
HPG27_RS04420	NC_011333.1	920885	921184	-	protein_coding	HPG27_RS04420	cupin	COG1917	Unknown function
HPG27_RS04430	NC_011333.1	922356	923900	+	protein_coding	fliK	flagellar hook-length control protein FliK	-	Unknown function
HPG27_RS04435	NC_011333.1	923951	924901	+	protein_coding	flgD	flagellar basal body rod modification protein FlgD	COG1843	Cell motility
HPG27_RS04440	NC_011333.1	924898	926715	+	protein_coding	flgE,flgE_2	flagellar hook protein FlgE	COG1749	Cell motility
HPG27_RS04450	NC_011333.1	927376	928509	+	protein_coding	hpy8IM,HINDIIM	SAM-dependent methyltransferase	COG0827	Replication, recombination and repair
HPG27_RS04455	NC_011333.1	928518	930545	+	protein_coding	pcrA,rep	ATP-dependent DNA helicase	COG0210	Replication, recombination and repair
HPG27_RS04465	NC_011333.1	931085	932638	+	protein_coding	hopC,alpA,omp20	membrane protein	-	Unknown function
HPG27_RS04470	NC_011333.1	932660	934258	+	protein_coding	hopB,alpB,omp21	membrane protein	-	Unknown function
HPG27_RS04475	NC_011333.1	935039	936583	-	protein_coding	hopG	membrane protein	-	Unknown function
HPG27_RS04480	NC_011333.1	936831	939266	-	protein_coding	frpB2,frpB	membrane protein	COG1629	Inorganic ion transport and metabolism
HPG27_RS04485	NC_011333.1	939443	939874	-	protein_coding	HPG27_RS04485	hypothetical protein	-	Unknown function
HPG27_RS04490	NC_011333.1	939879	943136	-	protein_coding	pyrAb,carB	carbamoyl phosphate synthase large subunit	COG0458	Amino acid transport and metabolism;Nucleotide transport and metabolism
HPG27_RS04495	NC_011333.1	943237	943929	-	protein_coding	HPG27_RS04495	membrane protein	COG0670	Unknown function
HPG27_RS04500	NC_011333.1	944074	945072	+	protein_coding	gap1,gap	type I glyceraldehyde-3-phosphate dehydrogenase	COG0057	Carbohydrate transport and metabolism
HPG27_RS04505	NC_011333.1	945152	952672	+	protein_coding	vlpC	toxin outer membrane protein	COG5651	Unknown function
HPG27_RS04510	NC_011333.1	952724	953827	+	protein_coding	hopK,omp22	membrane protein	-	Unknown function
HPG27_RS04515	NC_011333.1	953894	954100	-	protein_coding	dmpI	tautomerase	COG1942	Secondary metabolites biosynthesis, transport and catabolism
HPG27_RS04520	NC_011333.1	954241	954822	+	protein_coding	recR	recombination protein RecR	COG0353	Replication, recombination and repair
HPG27_RS04525	NC_011333.1	954819	955964	+	protein_coding	truD	tRNA pseudouridine(13) synthase TruD	COG0585	Translation, ribosomal structure and biogenesis
HPG27_RS04530	NC_011333.1	955903	956883	+	protein_coding	htpX	zinc metalloprotease HtpX	COG0501	Posttranslational modification, protein turnover, chaperones
HPG27_RS04535	NC_011333.1	956884	957426	+	protein_coding	folE	GTP cyclohydrolase I FolE	COG0302	Coenzyme transport and metabolism
HPG27_RS04540	NC_011333.1	957442	958353	+	protein_coding	ispA	geranyltranstransferase	COG0142	Coenzyme transport and metabolism
HPG27_RS04545	NC_011333.1	958350	959153	+	protein_coding	surE	5'-nucleotidase SurE	COG0496	Replication, recombination and repair
HPG27_RS04550	NC_011333.1	959150	959809	+	protein_coding	HPG27_RS04550	hypothetical protein	-	Unknown function
HPG27_RS04555	NC_011333.1	959813	960415	+	protein_coding	HPG27_RS04555	6-carboxy-5,6,7,8-tetrahydropterin synthase	COG0720	Coenzyme transport and metabolism
HPG27_RS04560	NC_011333.1	960412	961167	+	protein_coding	HPG27_RS04560	6-pyruvoyltetrahydropterin synthase	COG0602	Unknown function
HPG27_RS04565	NC_011333.1	961178	961663	+	protein_coding	HPG27_RS04565	GNAT family N-acetyltransferase	COG0456	Translation, ribosomal structure and biogenesis
HPG27_RS04570	NC_011333.1	961753	961995	+	protein_coding	HPG27_RS04570	membrane protein	-	Unknown function
HPG27_RS04575	NC_011333.1	962157	963536	-	protein_coding	proP	MFS transporter	COG0477	Carbohydrate transport and metabolism;Amino acid transport and metabolism;Inorganic ion transport and metabolism
HPG27_RS04580	NC_011333.1	964118	965488	-	protein_coding	HPG27_RS04580	hypothetical protein	COG1479	Unknown function
HPG27_RS04585	NC_011333.1	965552	966265	-	protein_coding	yckJ	cysteine ABC transporter permease	COG0765	Amino acid transport and metabolism
HPG27_RS04590	NC_011333.1	966249	967025	-	protein_coding	yckK	amino acid ABC transporter substrate-binding protein	COG0834	Signal transduction mechanisms;Amino acid transport and metabolism
HPG27_RS04595	NC_011333.1	967096	968229	-	protein_coding	alr	alanine racemase	COG0787	Cell wall/membrane/envelope biogenesis
HPG27_RS04600	NC_011333.1	968236	969588	-	protein_coding	dagA	transporter	COG1115	Amino acid transport and metabolism
HPG27_RS04605	NC_011333.1	969629	970861	-	protein_coding	dadA	oxidoreductase	COG0665	Amino acid transport and metabolism
HPG27_RS04610	NC_011333.1	970884	971261	-	protein_coding	yabJ	RidA family protein	COG0251	Defense mechanisms
HPG27_RS04635	NC_011333.1	972193	973674	+	protein_coding	nhaC	sodium:proton antiporter	COG1757	Energy production and conversion
HPG27_RS04640	NC_011333.1	974001	974363	+	protein_coding	HPG27_RS04640	hypothetical protein	-	Unknown function
HPG27_RS04645	NC_011333.1	974451	975734	-	protein_coding	tnpB	transposase	COG0675	Mobilome: prophages, transposons
HPG27_RS04650	NC_011333.1	975804	976175	+	protein_coding	tnpA	transposase	COG1943	Mobilome: prophages, transposons
HPG27_RS04655	NC_011333.1	976591	977604	-	protein_coding	HPG27_RS04655	hypothetical protein	-	Unknown function
HPG27_RS04660	NC_011333.1	977614	978066	-	protein_coding	rimH	23S rRNA (pseudouridine(1915)-N(3))-methyltransferase RlmH	COG1576	Translation, ribosomal structure and biogenesis
HPG27_RS04665	NC_011333.1	978080	978949	-	protein_coding	accD	acetyl-CoA carboxylase carboxyl transferase subunit beta	COG0777	Lipid transport and metabolism
HPG27_RS04670	NC_011333.1	979027	979644	+	protein_coding	recO	recombination protein RecO	-	Unknown function
HPG27_RS04675	NC_011333.1	979655	980311	+	protein_coding	cinA	damage-inducible protein CinA	COG1546	Coenzyme transport and metabolism
HPG27_RS04680	NC_011333.1	980314	980880	-	protein_coding	HPG27_RS04680	hypothetical protein	-	Unknown function
HPG27_RS04685	NC_011333.1	980945	981577	-	protein_coding	rdxA	NAD(P)H-dependent oxidoreductase	COG0778	Energy production and conversion
HPG27_RS04690	NC_011333.1	981574	982428	-	protein_coding	lgt	prolipoprotein diacylglyceryl transferase	COG0682	Cell wall/membrane/envelope biogenesis
HPG27_RS04695	NC_011333.1	982438	983166	-	protein_coding	rluC	RNA pseudouridine synthase	COG0564	Translation, ribosomal structure and biogenesis
HPG27_RS04700	NC_011333.1	983178	984359	-	protein_coding	kdtA	3-deoxy-D-manno-octulosonic acid transferase	COG1519	Cell wall/membrane/envelope biogenesis
HPG27_RS04705	NC_011333.1	984360	985112	-	protein_coding	HPG27_RS04705	hypothetical protein	COG1579	Unknown function
HPG27_RS04710	NC_011333.1	985122	985853	-	protein_coding	HPG27_RS04710	Nif3-like dinuclear metal center hexameric protein	COG0327	Coenzyme transport and metabolism
HPG27_RS04715	NC_011333.1	985855	986751	-	protein_coding	glyQ	glycine--tRNA ligase subunit alpha	-	Unknown function
HPG27_RS04720	NC_011333.1	986765	987703	-	protein_coding	gpsA	glycerol-3-phosphate dehydrogenase (NAD(P)(+))	COG0240	Energy production and conversion
HPG27_RS04725	NC_011333.1	988097	989620	-	protein_coding	HPG27_RS04725	ATPase	COG0699	Replication, recombination and repair
HPG27_RS04730	NC_011333.1	989692	990177	-	protein_coding	HPG27_RS04730	hypothetical protein	-	Unknown function
HPG27_RS04735	NC_011333.1	990199	991482	-	protein_coding	tnpB	transposase	COG0675	Mobilome: prophages, transposons
HPG27_RS04740	NC_011333.1	991552	991923	+	protein_coding	tnpA	transposase	COG1943	Mobilome: prophages, transposons
HPG27_RS04755	NC_011333.1	995870	996151	-	protein_coding	HPG27_RS04755	hypothetical protein	-	Unknown function
HPG27_RS04760	NC_011333.1	996162	999224	-	protein_coding	czcA1,czcA,czcA_1	CusA/CzcA family heavy metal efflux RND transporter	COG3696	Inorganic ion transport and metabolism
HPG27_RS04765	NC_011333.1	999221	1000300	-	protein_coding	czcB1,nccB	hypothetical protein	COG0845	Cell wall/membrane/envelope biogenesis;Defense mechanisms
HPG27_RS04770	NC_011333.1	1000297	1001532	-	protein_coding	cznC	hypothetical protein	COG1538	Cell wall/membrane/envelope biogenesis
HPG27_RS04775	NC_011333.1	1001582	1003687	-	protein_coding	glyS	glycine--tRNA ligase subunit beta	COG0751	Translation, ribosomal structure and biogenesis
HPG27_RS04780	NC_011333.1	1003800	1004858	+	protein_coding	HPG27_RS04780	hypothetical protein	-	Unknown function
HPG27_RS04785	NC_011333.1	1004871	1006346	+	protein_coding	pgm	2,3-bisphosphoglycerate-independent phosphoglycerate mutase	COG0696	Carbohydrate transport and metabolism
HPG27_RS04790	NC_011333.1	1006361	1006642	+	protein_coding	gatC	aspartyl/glutamyl-tRNA(Asn/Gln) amidotransferase subunit C	COG0721	Translation, ribosomal structure and biogenesis
HPG27_RS04795	NC_011333.1	1006761	1008071	-	protein_coding	HPG27_RS04795	adenosylmethionine--8-amino-7-oxononanoate transaminase	COG0161	Coenzyme transport and metabolism
HPG27_RS04800	NC_011333.1	1008201	1009664	+	protein_coding	ppiD	peptidylprolyl isomerase	COG0760	Posttranslational modification, protein turnover, chaperones
HPG27_RS04805	NC_011333.1	1009680	1011161	+	protein_coding	ftsA	cell division protein FtsA	COG0849	Cell cycle control, cell division, chromosome partitioning
HPG27_RS04810	NC_011333.1	1011292	1012449	+	protein_coding	ftsZ	cell division protein FtsZ	COG0206	Cell cycle control, cell division, chromosome partitioning
HPG27_RS04815	NC_011333.1	1013312	1013536	-	protein_coding	HPG27_RS04815	hypothetical protein	-	Unknown function
HPG27_RS04820	NC_011333.1	1013613	1013909	+	protein_coding	HPG27_RS04820	RIP metalloprotease RseP	COG0750	Transcription;Posttranslational modification, protein turnover, chaperones
HPG27_RS04835	NC_011333.1	1015806	1016024	+	protein_coding	HPG27_RS04835	hypothetical protein	-	Unknown function
HPG27_RS04840	NC_011333.1	1016096	1016920	+	protein_coding	mscC	mechanosensitive ion channel protein	COG0668	Cell wall/membrane/envelope biogenesis
HPG27_RS04850	NC_011333.1	1017573	1017722	-	protein_coding	HPG27_RS04850	type II restriction endonuclease	-	Unknown function
HPG27_RS04860	NC_011333.1	1018435	1018725	-	protein_coding	HPG27_RS04860	hypothetical protein	-	Unknown function
HPG27_RS04865	NC_011333.1	1018712	1018927	-	protein_coding	HPG27_RS04865	hypothetical protein	-	Unknown function
HPG27_RS04870	NC_011333.1	1018917	1019171	-	protein_coding	HPG27_RS04870	hypothetical protein	-	Unknown function
HPG27_RS04875	NC_011333.1	1019238	1019615	-	protein_coding	HPG27_RS04875	hypothetical protein	-	Unknown function
HPG27_RS04900	NC_011333.1	1023479	1024042	-	protein_coding	terY	tellurite resistance protein TerY	-	Unknown function
HPG27_RS04920	NC_011333.1	1028438	1028761	+	protein_coding	HPG27_RS04920	hypothetical protein	-	Unknown function
HPG27_RS04925	NC_011333.1	1028819	1030564	+	protein_coding	HPG27_RS04925	hypothetical protein	COG1479	Unknown function
HPG27_RS04930	NC_011333.1	1030605	1031858	+	protein_coding	HPG27_RS04930	hypothetical protein	COG0608	Replication, recombination and repair
HPG27_RS04935	NC_011333.1	1031902	1033761	+	protein_coding	HPG27_RS04935	hypothetical protein	-	Unknown function
HPG27_RS04940	NC_011333.1	1033868	1034806	+	protein_coding	HPG27_RS04940	hypothetical protein	-	Unknown function
HPG27_RS04945	NC_011333.1	1034915	1036762	-	protein_coding	speA	arginine decarboxylase	COG1166	Amino acid transport and metabolism
HPG27_RS04950	NC_011333.1	1036777	1037946	-	protein_coding	capJ	glycosyl transferase family 1	COG0438	Cell wall/membrane/envelope biogenesis
HPG27_RS04955	NC_011333.1	1037951	1038379	-	protein_coding	HPG27_RS04955	thioesterase	COG2050	Secondary metabolites biosynthesis, transport and catabolism
HPG27_RS04960	NC_011333.1	1038395	1039180	-	protein_coding	HPG27_RS04960	tRNA 5-methoxyuridine(34)/uridine 5-oxyacetic acid(34) synthase CmoB	-	Unknown function
HPG27_RS04965	NC_011333.1	1039184	1040191	-	protein_coding	HPG27_RS04965	hypothetical protein	-	Unknown function
HPG27_RS04970	NC_011333.1	1040192	1042144	-	protein_coding	metS,metG	methionine--tRNA ligase	COG0143	Translation, ribosomal structure and biogenesis
HPG27_RS04975	NC_011333.1	1042313	1043482	+	protein_coding	cfa	SAM-dependent methyltransferase	COG2230	Lipid transport and metabolism
HPG27_RS04980	NC_011333.1	1043492	1045363	-	protein_coding	HPG27_RS04980	mechanosensitive ion channel protein	COG0668	Cell wall/membrane/envelope biogenesis
HPG27_RS04985	NC_011333.1	1045764	1046528	+	protein_coding	HPG27_RS04985	hypothetical protein	-	Unknown function
HPG27_RS04995	NC_011333.1	1048432	1048734	+	protein_coding	HPG27_RS04995	hypothetical protein	-	Unknown function
HPG27_RS05000	NC_011333.1	1048735	1048995	+	protein_coding	HPG27_RS05000	hypothetical protein	-	Unknown function
HPG27_RS05010	NC_011333.1	1051500	1053434	+	protein_coding	topA1,topA	DNA topoisomerase I	COG0550	Replication, recombination and repair
HPG27_RS05015	NC_011333.1	1053564	1054550	+	protein_coding	HPG27_RS05015	competence protein	-	Unknown function
HPG27_RS05020	NC_011333.1	1054550	1056091	+	protein_coding	HPG27_RS05020	conjugal transfer protein	COG3504	Intracellular trafficking, secretion, and vesicular transport
HPG27_RS05025	NC_011333.1	1056088	1057323	+	protein_coding	HPG27_RS05025	competence protein	COG2948	Intracellular trafficking, secretion, and vesicular transport
HPG27_RS05030	NC_011333.1	1057393	1057689	+	protein_coding	HPG27_RS05030	hypothetical protein	-	Unknown function
HPG27_RS05035	NC_011333.1	1057679	1057942	+	protein_coding	HPG27_RS05035	hypothetical protein	-	Unknown function
HPG27_RS05045	NC_011333.1	1058237	1059178	+	protein_coding	HPG27_RS05045	hypothetical protein	COG0630	Intracellular trafficking, secretion, and vesicular transport
HPG27_RS05050	NC_011333.1	1059175	1059630	+	protein_coding	HPG27_RS05050	hypothetical protein	-	Unknown function
HPG27_RS05055	NC_011333.1	1059627	1059917	+	protein_coding	HPG27_RS05055	hypothetical protein	-	Unknown function
HPG27_RS05060	NC_011333.1	1059918	1060475	+	protein_coding	HPG27_RS05060	hypothetical protein	-	Unknown function
HPG27_RS05065	NC_011333.1	1060731	1062203	+	protein_coding	traG	conjugal transfer protein TraG	COG3505	Intracellular trafficking, secretion, and vesicular transport
HPG27_RS05070	NC_011333.1	1062466	1062747	-	protein_coding	HPG27_RS05070	YafQ family addiction module toxin	-	Unknown function
HPG27_RS05075	NC_011333.1	1062740	1063054	-	protein_coding	HPG27_RS05075	hypothetical protein	-	Unknown function
HPG27_RS05080	NC_011333.1	1063336	1065246	+	protein_coding	HPG27_RS05080	hypothetical protein	COG3843	Intracellular trafficking, secretion, and vesicular transport
HPG27_RS05085	NC_011333.1	1065271	1066443	-	protein_coding	HPG27_RS05085	hypothetical protein	-	Unknown function
HPG27_RS05090	NC_011333.1	1066475	1066759	-	protein_coding	HPG27_RS05090	hypothetical protein	-	Unknown function
HPG27_RS05095	NC_011333.1	1066842	1067498	-	protein_coding	parA	chromosome partitioning protein ParA	COG1192	Cell motility
HPG27_RS05100	NC_011333.1	1067764	1076190	-	protein_coding	HPG27_RS05100	helicase	COG4646	Replication, recombination and repair
HPG27_RS05105	NC_011333.1	1076345	1077382	+	protein_coding	HPG27_RS05105	hypothetical protein	-	Unknown function
HPG27_RS05110	NC_011333.1	1077383	1078777	+	protein_coding	HPG27_RS05110	hypothetical protein	-	Unknown function
HPG27_RS05115	NC_011333.1	1078838	1081051	+	protein_coding	HPG27_RS05115	hypothetical protein	-	Unknown function
HPG27_RS05120	NC_011333.1	1081055	1082440	+	protein_coding	HPG27_RS05120	hypothetical protein	-	Unknown function
HPG27_RS05125	NC_011333.1	1082440	1083642	+	protein_coding	HPG27_RS05125	hypothetical protein	-	Unknown function
HPG27_RS05130	NC_011333.1	1083705	1084781	-	protein_coding	xerD	integrase	-	Unknown function
HPG27_RS05160	NC_011333.1	1085950	1086699	-	protein_coding	HpaA	neuraminyllactose-binding hemagglutinin HpaA	-	Unknown function
HPG27_RS05165	NC_011333.1	1086783	1088309	-	protein_coding	guaA	GMP synthase (glutamine-hydrolyzing)	COG0519	Nucleotide transport and metabolism
HPG27_RS05170	NC_011333.1	1088320	1088808	-	protein_coding	HPG27_RS05170	hypothetical protein	-	Unknown function
HPG27_RS05175	NC_011333.1	1088969	1091359	-	protein_coding	bisC	biotin sulfoxide reductase	COG0243	Energy production and conversion
HPG27_RS05180	NC_011333.1	1091463	1092053	-	protein_coding	HPG27_RS05180	hypothetical protein	-	Unknown function
HPG27_RS05185	NC_011333.1	1092079	1093401	-	protein_coding	HPG27_RS05185	cysteine desulfurase	COG0520	Amino acid transport and metabolism
HPG27_RS05190	NC_011333.1	1093421	1093735	-	protein_coding	HINT,PKCI1	histidine triad nucleotide-binding protein	COG0537	Carbohydrate transport and metabolism;Nucleotide transport and metabolism
HPG27_RS05195	NC_011333.1	1093816	1094802	+	protein_coding	pheS	phenylalanine--tRNA ligase subunit alpha	COG0016	Translation, ribosomal structure and biogenesis
HPG27_RS05200	NC_011333.1	1094802	1097096	+	protein_coding	pheT	phenylalanine--tRNA ligase subunit beta	COG0073	Translation, ribosomal structure and biogenesis
HPG27_RS05205	NC_011333.1	1097100	1098389	+	protein_coding	aroA	3-phosphoshikimate 1-carboxyvinyltransferase	COG0128	Amino acid transport and metabolism
HPG27_RS05210	NC_011333.1	1098379	1099203	+	protein_coding	ispH,lytB	4-hydroxy-3-methylbut-2-enyl diphosphate reductase	COG0761	Lipid transport and metabolism
HPG27_RS05215	NC_011333.1	1099324	1100994	+	protein_coding	rps1,rpsA	30S ribosomal protein S1	COG0539	Translation, ribosomal structure and biogenesis
HPG27_RS05220	NC_011333.1	1101023	1101574	+	protein_coding	HPG27_RS05220	hypothetical protein	-	Unknown function
HPG27_RS05225	NC_011333.1	1101590	1103164	+	protein_coding	serA	phosphoglycerate dehydrogenase	COG0111	Coenzyme transport and metabolism
HPG27_RS05230	NC_011333.1	1103174	1105024	+	protein_coding	ubiD	menaquinone biosynthesis decarboxylase	COG0043	Coenzyme transport and metabolism
HPG27_RS05235	NC_011333.1	1105047	1105715	+	protein_coding	HPG27_RS05235	YggS family pyridoxal phosphate enzyme	COG0325	Unknown function
HPG27_RS05240	NC_011333.1	1105717	1106475	+	protein_coding	HPG27_RS05240	UDP-2,3-diacylglucosamine hydrolase	COG2908	Cell wall/membrane/envelope biogenesis
HPG27_RS05245	NC_011333.1	1106479	1107414	+	protein_coding	cheV3,cheV,cheV_3	fused signal transduction protein/response regulator	COG0835	Signal transduction mechanisms;Cell motility
HPG27_RS05250	NC_011333.1	1107471	1109894	+	protein_coding	cheA,cheAY2	chemotaxis protein A	COG0784	Signal transduction mechanisms;Cell motility
HPG27_RS05255	NC_011333.1	1109891	1110388	+	protein_coding	cheW	chemotaxis protein CheW	COG0835	Cell motility;Signal transduction mechanisms
HPG27_RS05260	NC_011333.1	1110646	1111146	-	protein_coding	tpx,tagD	2-Cys peroxiredoxin	COG2077	Posttranslational modification, protein turnover, chaperones
HPG27_RS05265	NC_011333.1	1111370	1112011	+	protein_coding	sodB,sodF	superoxide dismutase	COG0605	Inorganic ion transport and metabolism
HPG27_RS05270	NC_011333.1	1112063	1112782	+	protein_coding	HPG27_RS05270	carboxy-S-adenosyl-L-methionine synthase CmoA	COG0500	Secondary metabolites biosynthesis, transport and catabolism
HPG27_RS05275	NC_011333.1	1112814	1114673	-	protein_coding	priA	primosomal protein N'	COG1198	Replication, recombination and repair
HPG27_RS05280	NC_011333.1	1114658	1114894	-	protein_coding	HPG27_RS05280	hypothetical protein	-	Unknown function
HPG27_RS05285	NC_011333.1	1114907	1115137	-	protein_coding	HPG27_RS05285	hypothetical protein	-	Unknown function
HPG27_RS05290	NC_011333.1	1115316	1116062	+	protein_coding	HPG27_RS05290	SPOR domain-containing protein	-	Unknown function
HPG27_RS05295	NC_011333.1	1116076	1116600	-	protein_coding	HPG27_RS05295	hypothetical protein	-	Unknown function
HPG27_RS05300	NC_011333.1	1116781	1118004	+	protein_coding	YJR117W	peptidase M48	COG0501	Posttranslational modification, protein turnover, chaperones
HPG27_RS05305	NC_011333.1	1118001	1118825	+	protein_coding	hemG,hemK	N5-glutamine S-adenosyl-L-methionine-dependent methyltransferase	COG2890	Translation, ribosomal structure and biogenesis
HPG27_RS05310	NC_011333.1	1118897	1120243	+	protein_coding	gdhA	glutamate dehydrogenase	COG0334	Amino acid transport and metabolism
HPG27_RS05315	NC_011333.1	1120262	1121599	-	protein_coding	futB,fucTa	fucosyltransferase	-	Unknown function
HPG27_RS05320	NC_011333.1	1121609	1124419	-	protein_coding	ccsA	cytochrome c biogenesis protein	COG0755	Posttranslational modification, protein turnover, chaperones
HPG27_RS05325	NC_011333.1	1124428	1125099	-	protein_coding	dsbC	thiol:disulfide interchange protein	COG2143	Posttranslational modification, protein turnover, chaperones
HPG27_RS05330	NC_011333.1	1125171	1126178	-	protein_coding	hemH	ferrochelatase	COG0276	Coenzyme transport and metabolism
HPG27_RS05335	NC_011333.1	1126234	1126665	+	protein_coding	HPG27_RS05335	hypothetical protein	-	Unknown function
HPG27_RS05340	NC_011333.1	1126666	1127346	+	protein_coding	rsmE	16S rRNA (uracil(1498)-N(3))-methyltransferase	COG1385	Translation, ribosomal structure and biogenesis
HPG27_RS05345	NC_011333.1	1127370	1129466	-	protein_coding	homC	hypothetical protein	-	Unknown function
HPG27_RS05350	NC_011333.1	1129626	1130192	-	protein_coding	dcd	deoxycytidine triphosphate deaminase	COG0717	Nucleotide transport and metabolism
HPG27_RS05355	NC_011333.1	1130323	1130796	+	protein_coding	accB,fabE	acetyl-CoA carboxylase, biotin carboxyl carrier protein	COG0511	Lipid transport and metabolism;Coenzyme transport and metabolism
HPG27_RS05360	NC_011333.1	1130802	1132169	+	protein_coding	accC	acetyl-CoA carboxylase biotin carboxylase subunit	COG0439	Lipid transport and metabolism
HPG27_RS05365	NC_011333.1	1132262	1133224	+	protein_coding	HPG27_RS05365	hypothetical protein	-	Unknown function
HPG27_RS05370	NC_011333.1	1133224	1133772	+	protein_coding	HPG27_RS05370	hypothetical protein	-	Unknown function
HPG27_RS05375	NC_011333.1	1133866	1134474	+	protein_coding	HPG27_RS05375	hypothetical protein	-	Unknown function
HPG27_RS05380	NC_011333.1	1134471	1135598	+	protein_coding	pseC	UDP-4-amino-4,6-dideoxy-N-acetyl-beta-L-altrosamine transaminase	COG0399	Cell wall/membrane/envelope biogenesis
HPG27_RS05390	NC_011333.1	1135922	1136947	+	protein_coding	nrdB,nrdF	ribonucleotide-diphosphate reductase subunit beta	COG0208	Nucleotide transport and metabolism
HPG27_RS05395	NC_011333.1	1136957	1137586	+	protein_coding	pcm	protein-L-isoaspartate O-methyltransferase	COG2518	Posttranslational modification, protein turnover, chaperones
HPG27_RS05400	NC_011333.1	1137597	1138634	+	protein_coding	HPG27_RS05400	permease	COG0795	Cell wall/membrane/envelope biogenesis;Cell motility
HPG27_RS05405	NC_011333.1	1138635	1139363	+	protein_coding	truA,hisT	tRNA pseudouridine(38-40) synthase TruA	COG0101	Translation, ribosomal structure and biogenesis
HPG27_RS05410	NC_011333.1	1139357	1140391	-	protein_coding	galE	UDP-glucose 4-epimerase	COG1087	Cell wall/membrane/envelope biogenesis
HPG27_RS05430	NC_011333.1	1141105	1142640	+	protein_coding	HPG27_RS05430	hypothetical protein	-	Unknown function
HPG27_RS05435	NC_011333.1	1142658	1143419	+	protein_coding	HPG27_RS05435	NAD(P)-dependent oxidoreductase	COG4221	Energy production and conversion
HPG27_RS05440	NC_011333.1	1143603	1144475	-	protein_coding	hcpC	Sel1 repeat protein HcpC	COG0790	Signal transduction mechanisms
HPG27_RS05445	NC_011333.1	1144550	1145170	-	protein_coding	eda	ketohydroxyglutarate aldolase	COG0800	Carbohydrate transport and metabolism
HPG27_RS05450	NC_011333.1	1145189	1147015	-	protein_coding	edd	phosphogluconate dehydratase	COG0129	Amino acid transport and metabolism;Carbohydrate transport and metabolism
HPG27_RS05455	NC_011333.1	1147081	1148358	+	protein_coding	zwf,g6pD	glucose-6-phosphate dehydrogenase	COG0364	Carbohydrate transport and metabolism
HPG27_RS05460	NC_011333.1	1148368	1149051	+	protein_coding	pgl,devB	6-phosphogluconolactonase	COG0363	Carbohydrate transport and metabolism
HPG27_RS05465	NC_011333.1	1149038	1150048	+	protein_coding	glk	glucokinase	COG0837	Carbohydrate transport and metabolism
HPG27_RS05470	NC_011333.1	1150218	1151264	+	protein_coding	cad	NADP-dependent alcohol dehydrogenase	COG1064	Carbohydrate transport and metabolism
HPG27_RS05475	NC_011333.1	1151277	1152575	-	protein_coding	HPG27_RS05475	LPS biosynthesis protein	COG1442	Cell wall/membrane/envelope biogenesis
HPG27_RS05480	NC_011333.1	1152763	1154070	+	protein_coding	HPG27_RS05480	hypothetical protein	-	Unknown function
HPG27_RS05485	NC_011333.1	1154077	1154769	-	protein_coding	horH,omp23	hypothetical protein	-	Unknown function
HPG27_RS05490	NC_011333.1	1155029	1155589	+	protein_coding	porG,porC	pyruvate flavodoxin oxidoreductase subunit gamma	COG1014	Energy production and conversion
HPG27_RS05495	NC_011333.1	1155605	1155997	+	protein_coding	porD	ferredoxin	COG1144	Energy production and conversion
HPG27_RS05500	NC_011333.1	1156007	1157230	+	protein_coding	porA	2-ketoisovalerate ferredoxin oxidoreductase subunit alpha	COG0674	Energy production and conversion
HPG27_RS05505	NC_011333.1	1157244	1158188	+	protein_coding	porB	pyruvate ferredoxin oxidoreductase subunit beta	COG1013	Energy production and conversion
HPG27_RS05510	NC_011333.1	1158298	1159620	+	protein_coding	purB	adenylosuccinate lyase	COG0015	Nucleotide transport and metabolism
HPG27_RS05515	NC_011333.1	1159686	1160519	+	protein_coding	horI,omp24	membrane protein	-	Unknown function
HPG27_RS05520	NC_011333.1	1160530	1162506	-	protein_coding	uvrB	excinuclease ABC subunit B	COG0556	Replication, recombination and repair
HPG27_RS05525	NC_011333.1	1162547	1163374	-	protein_coding	HPG27_RS05525	hypothetical protein	-	Unknown function
HPG27_RS05540	NC_011333.1	1166236	1166436	+	protein_coding	HPG27_RS05540	hypothetical protein	-	Unknown function
HPG27_RS05550	NC_011333.1	1166692	1167462	-	protein_coding	hcpX	hypothetical protein	COG0790	Signal transduction mechanisms
HPG27_RS05555	NC_011333.1	1167730	1169433	-	protein_coding	ggt	gamma-glutamyltransferase	COG0405	Amino acid transport and metabolism
HPG27_RS05560	NC_011333.1	1169628	1171448	-	protein_coding	flgK	flagellar hook-associated protein FlgK	COG1256	Cell motility
HPG27_RS05565	NC_011333.1	1171450	1171884	-	protein_coding	HPG27_RS05565	hypothetical protein	-	Unknown function
HPG27_RS05570	NC_011333.1	1172002	1172940	-	protein_coding	hpyAVIIIM,hpy99IIIM,BSP6IM	DNA (cytosine-5-)-methyltransferase	COG0270	Replication, recombination and repair
HPG27_RS05575	NC_011333.1	1173094	1173324	-	protein_coding	flgM	hypothetical protein	-	Unknown function
HPG27_RS05580	NC_011333.1	1173361	1173567	-	protein_coding	HPG27_RS05580	hypothetical protein	-	Unknown function
HPG27_RS05585	NC_011333.1	1173599	1174156	-	protein_coding	slyD	peptidyl-prolyl cis-trans isomerase	COG1047	Posttranslational modification, protein turnover, chaperones
HPG27_RS05590	NC_011333.1	1174143	1175132	-	protein_coding	HPG27_RS05590	hypothetical protein	-	Unknown function
HPG27_RS05595	NC_011333.1	1175140	1175679	-	protein_coding	palA	peptidoglycan-binding protein	COG2885	Cell wall/membrane/envelope biogenesis
HPG27_RS05600	NC_011333.1	1175746	1176999	-	protein_coding	tolB	translocation protein TolB	COG0823	Intracellular trafficking, secretion, and vesicular transport
HPG27_RS05605	NC_011333.1	1176996	1177820	-	protein_coding	HPG27_RS05605	cell envelope biogenesis protein TonB	-	Unknown function
HPG27_RS05610	NC_011333.1	1177839	1178240	-	protein_coding	exbD1,exbD,exbD_1	biopolymer transporter ExbD	COG0848	Intracellular trafficking, secretion, and vesicular transport
HPG27_RS05615	NC_011333.1	1178293	1178862	-	protein_coding	exbB1,exbB,exbB_1	biopolymer transporter ExbB	COG0811	Intracellular trafficking, secretion, and vesicular transport
HPG27_RS05620	NC_011333.1	1178873	1179247	-	protein_coding	atpC	F0F1 ATP synthase subunit epsilon	COG0355	Energy production and conversion
HPG27_RS05625	NC_011333.1	1179255	1180664	-	protein_coding	atpD	ATP synthase subunit beta	COG0055	Energy production and conversion
HPG27_RS05630	NC_011333.1	1180687	1181592	-	protein_coding	atpG	ATP synthase subunit gamma	COG0224	Energy production and conversion
HPG27_RS05635	NC_011333.1	1181607	1183118	-	protein_coding	atpA	ATP synthase subunit alpha	COG0056	Energy production and conversion
HPG27_RS05640	NC_011333.1	1183141	1183683	-	protein_coding	atpH	F0F1 ATP synthase subunit delta	COG0712	Energy production and conversion
HPG27_RS05645	NC_011333.1	1183684	1184199	-	protein_coding	atpF	ATP synthase subunit B	COG0711	Energy production and conversion
HPG27_RS05650	NC_011333.1	1184203	1184637	-	protein_coding	atpX,atpF'	F0F1 ATP synthase subunit B'	COG0711	Energy production and conversion
HPG27_RS05655	NC_011333.1	1184747	1185619	-	protein_coding	parB	chromosome partitioning protein ParB	COG1475	Cell cycle control, cell division, chromosome partitioning
HPG27_RS05660	NC_011333.1	1185622	1186416	-	protein_coding	soj	sporulation initiation inhibitor Soj	COG1192	Cell motility
HPG27_RS05665	NC_011333.1	1186419	1187057	-	protein_coding	birA	biotin--[acetyl-CoA-carboxylase] ligase	COG0340	Coenzyme transport and metabolism
HPG27_RS05670	NC_011333.1	1187054	1187965	-	protein_coding	fmt	methionyl-tRNA formyltransferase	COG0223	Translation, ribosomal structure and biogenesis
HPG27_RS05680	NC_011333.1	1190503	1191801	-	protein_coding	HPG27_RS05680	hypothetical protein	COG4487	Unknown function
HPG27_RS05685	NC_011333.1	1192009	1192464	+	protein_coding	HPG27_RS05685	hypothetical protein	-	Unknown function
HPG27_RS05700	NC_011333.1	1195000	1195788	-	protein_coding	HPG27_RS05700	nuclease	COG1432	Unknown function
HPG27_RS05705	NC_011333.1	1196159	1196515	-	protein_coding	rpl19,rplS	50S ribosomal protein L19	COG0335	Translation, ribosomal structure and biogenesis
HPG27_RS05710	NC_011333.1	1196537	1197226	-	protein_coding	trmD	tRNA (guanosine(37)-N1)-methyltransferase TrmD	COG0336	Translation, ribosomal structure and biogenesis
HPG27_RS05715	NC_011333.1	1197227	1197781	-	protein_coding	rimM	16S rRNA-processing protein RimM	COG0806	Translation, ribosomal structure and biogenesis
HPG27_RS05720	NC_011333.1	1197782	1198129	-	protein_coding	HPG27_RS05720	RNA-binding protein	COG1837	Unknown function
HPG27_RS05725	NC_011333.1	1198146	1198373	-	protein_coding	rpS16,rpsP	30S ribosomal protein S16	COG0228	Translation, ribosomal structure and biogenesis
HPG27_RS05730	NC_011333.1	1198447	1199793	-	protein_coding	ffh	signal recognition particle protein	COG0541	Intracellular trafficking, secretion, and vesicular transport
HPG27_RS05735	NC_011333.1	1199808	1202432	-	protein_coding	valS	valine--tRNA ligase	COG0525	Translation, ribosomal structure and biogenesis
HPG27_RS05740	NC_011333.1	1202563	1202970	+	protein_coding	fliw	flagellar assembly protein FliW	COG1699	Cell motility
HPG27_RS05745	NC_011333.1	1202982	1204043	+	protein_coding	murG	undecaprenyldiphospho-muramoylpentapeptide beta-N- acetylglucosaminyltransferase	COG0707	Cell wall/membrane/envelope biogenesis
HPG27_RS05750	NC_011333.1	1204152	1206236	+	protein_coding	hopI,omp25	membrane protein	-	Unknown function
HPG27_RS05760	NC_011333.1	1209956	1210729	+	protein_coding	proC	pyrroline-5-carboxylate reductase	COG0345	Amino acid transport and metabolism
HPG27_RS05765	NC_011333.1	1210756	1211289	+	protein_coding	fic	adenosine monophosphate-protein transferase	COG2184	Signal transduction mechanisms
HPG27_RS05770	NC_011333.1	1211525	1211953	-	protein_coding	ybeY	endoribonuclease YbeY	COG0319	Translation, ribosomal structure and biogenesis
HPG27_RS05775	NC_011333.1	1212007	1212501	-	protein_coding	fldA	flavodoxin	COG0716	Energy production and conversion
HPG27_RS05780	NC_011333.1	1212593	1213207	-	protein_coding	HPG27_RS05780	membrane protein	COG0586	Unknown function
HPG27_RS05785	NC_011333.1	1213308	1213505	+	protein_coding	fixS	cbb3-type cytochrome oxidase assembly protein CcoS	COG3197	Inorganic ion transport and metabolism
HPG27_RS05790	NC_011333.1	1213531	1214505	+	protein_coding	trxR2,trxB	pyridine nucleotide-disulfide oxidoreductase	COG0492	Posttranslational modification, protein turnover, chaperones
HPG27_RS05795	NC_011333.1	1214512	1215672	-	protein_coding	HPG27_RS05795	MFS transporter	-	Unknown function
HPG27_RS05800	NC_011333.1	1215736	1217373	+	protein_coding	pgi	glucose-6-phosphate isomerase	COG0166	Carbohydrate transport and metabolism
HPG27_RS05810	NC_011333.1	1219400	1221463	-	protein_coding	cstA	carbon starvation protein A	COG1966	Signal transduction mechanisms
HPG27_RS05815	NC_011333.1	1221673	1222326	+	protein_coding	glnP1,glnP	amino acid ABC transporter	COG0765	Amino acid transport and metabolism
HPG27_RS05820	NC_011333.1	1222328	1222999	+	protein_coding	glnP2,glnP	amino acid ABC transporter permease	-	Unknown function
HPG27_RS05825	NC_011333.1	1223001	1223747	+	protein_coding	glnQ	glutamine ABC transporter ATP-binding protein	COG1126	Amino acid transport and metabolism
HPG27_RS05830	NC_011333.1	1223796	1224629	+	protein_coding	glnH	glutamine ABC transporter substrate-binding protein	COG0834	Amino acid transport and metabolism;Signal transduction mechanisms
HPG27_RS05835	NC_011333.1	1224750	1225301	+	protein_coding	HPG27_RS05835	hypothetical protein	-	Unknown function
HPG27_RS05840	NC_011333.1	1225563	1226786	-	protein_coding	gluP	glucose/galactose MFS transporter	COG0738	Carbohydrate transport and metabolism
HPG27_RS05845	NC_011333.1	1226915	1228222	-	protein_coding	HPG27_RS05845	NCS2 family permease	COG2252	Nucleotide transport and metabolism
HPG27_RS05850	NC_011333.1	1228696	1230621	-	protein_coding	hopQ,omp27	membrane protein	-	Unknown function
HPG27_RS05855	NC_011333.1	1231083	1231784	-	protein_coding	deoD	purine-nucleoside phosphorylase	COG0813	Nucleotide transport and metabolism
HPG27_RS05860	NC_011333.1	1231781	1233022	-	protein_coding	deoB	phosphopentomutase	COG1015	Carbohydrate transport and metabolism
HPG27_RS05865	NC_011333.1	1233034	1234290	-	protein_coding	nupC	NupC/NupG family nucleoside CNT transporter	COG1972	Nucleotide transport and metabolism
HPG27_RS05875	NC_011333.1	1234610	1235941	+	protein_coding	HPG27_RS05875	MFS transporter	COG2814	Carbohydrate transport and metabolism
HPG27_RS05880	NC_011333.1	1235960	1236721	+	protein_coding	HPG27_RS05880	tRNA 2-thiocytidine(32) synthetase TtcA	COG0037	Translation, ribosomal structure and biogenesis
HPG27_RS05885	NC_011333.1	1236730	1237881	-	protein_coding	napA	sodium:proton antiporter	COG0475	Inorganic ion transport and metabolism
HPG27_RS05890	NC_011333.1	1237907	1239286	-	protein_coding	HPG27_RS05890	membrane protein	COG0534	Defense mechanisms
HPG27_RS05895	NC_011333.1	1239455	1240630	-	protein_coding	sotB	MFS transporter	COG2814	Carbohydrate transport and metabolism
HPG27_RS05900	NC_011333.1	1240904	1241647	+	protein_coding	cah	carbonic anhydrase	COG3338	Inorganic ion transport and metabolism
HPG27_RS05905	NC_011333.1	1241877	1242836	-	protein_coding	HPG27_RS05905	hypothetical protein	-	Unknown function
HPG27_RS05910	NC_011333.1	1243113	1244351	-	protein_coding	HPG27_RS05910	hypothetical protein	-	Unknown function
HPG27_RS05915	NC_011333.1	1244628	1245737	-	protein_coding	HPG27_RS05915	hypothetical protein	-	Unknown function
HPG27_RS05920	NC_011333.1	1246014	1247198	-	protein_coding	HPG27_RS05920	hypothetical protein	-	Unknown function
HPG27_RS05925	NC_011333.1	1247631	1248671	-	protein_coding	asd	aspartate-semialdehyde dehydrogenase	COG0136	Amino acid transport and metabolism
HPG27_RS05930	NC_011333.1	1248658	1249986	-	protein_coding	hisS	histidine--tRNA ligase	COG0124	Translation, ribosomal structure and biogenesis
HPG27_RS05935	NC_011333.1	1250048	1251097	+	protein_coding	rfaF	lipopolysaccharide heptosyltransferase II	COG0859	Cell wall/membrane/envelope biogenesis
HPG27_RS05940	NC_011333.1	1251286	1251720	-	protein_coding	HPG27_RS05940	hypothetical protein	-	Unknown function
HPG27_RS05945	NC_011333.1	1251938	1252927	+	protein_coding	HPG27_RS05945	aldo/keto reductase	COG0667	Unknown function
HPG27_RS05950	NC_011333.1	1253443	1255521	-	protein_coding	fusA	elongation factor G	COG0480	Translation, ribosomal structure and biogenesis
HPG27_RS05955	NC_011333.1	1255533	1256000	-	protein_coding	rps7	30S ribosomal protein S7	COG0049	Translation, ribosomal structure and biogenesis
HPG27_RS05960	NC_011333.1	1256016	1256423	-	protein_coding	rps12,rpsL	30S ribosomal protein S12	COG0048	Translation, ribosomal structure and biogenesis
HPG27_RS05975	NC_011333.1	1265405	1265782	-	protein_coding	rpl12,rpl7,rplL	50S ribosomal protein L7/L12	COG0222	Translation, ribosomal structure and biogenesis
HPG27_RS05980	NC_011333.1	1265824	1266318	-	protein_coding	rpl10,rplJ	50S ribosomal protein L10	COG0244	Translation, ribosomal structure and biogenesis
HPG27_RS05985	NC_011333.1	1266427	1267131	-	protein_coding	rpl1,rplA	50S ribosomal protein L1	COG0081	Translation, ribosomal structure and biogenesis
HPG27_RS05990	NC_011333.1	1267176	1267601	-	protein_coding	rpl11,rplK	50S ribosomal protein L11	COG0080	Translation, ribosomal structure and biogenesis
HPG27_RS05995	NC_011333.1	1267619	1268149	-	protein_coding	nusG	transcription termination/antitermination protein NusG	COG0250	Transcription
HPG27_RS06000	NC_011333.1	1268176	1268355	-	protein_coding	secE	preprotein translocase subunit SecE	COG0690	Intracellular trafficking, secretion, and vesicular transport
HPG27_RS06010	NC_011333.1	1268612	1268770	-	protein_coding	rpL33,rpmG	50S ribosomal protein L33	COG0267	Translation, ribosomal structure and biogenesis
HPG27_RS06015	NC_011333.1	1268804	1270003	-	protein_coding	tuf,tufA,tufB	elongation factor Tu	COG0050	Translation, ribosomal structure and biogenesis
HPG27_RS06040	NC_011333.1	1270700	1272436	+	protein_coding	hetA	multidrug transporter	COG1132	Defense mechanisms
HPG27_RS06045	NC_011333.1	1272445	1273113	-	protein_coding	HPG27_RS06045	hydrolase	COG0546	Energy production and conversion
HPG27_RS06050	NC_011333.1	1273216	1274205	-	protein_coding	hpyAIM,hpy99XM,hpyIM	restriction endonuclease subunit M	COG3392	Replication, recombination and repair
HPG27_RS06055	NC_011333.1	1274533	1274817	-	protein_coding	HPG27_RS06055	hypothetical protein	-	Unknown function
HPG27_RS06060	NC_011333.1	1275032	1275553	-	protein_coding	cysE	serine O-acetyltransferase	COG1045	Amino acid transport and metabolism
HPG27_RS06075	NC_011333.1	1276166	1276483	-	protein_coding	atpE	ATP synthase subunit C	COG0636	Energy production and conversion
HPG27_RS06080	NC_011333.1	1276616	1278682	-	protein_coding	pnp	polyribonucleotide nucleotidyltransferase	COG1185	Translation, ribosomal structure and biogenesis
HPG27_RS06085	NC_011333.1	1278685	1279407	-	protein_coding	HPG27_RS06085	hypothetical protein	COG1926	Unknown function
HPG27_RS06090	NC_011333.1	1279404	1281665	-	protein_coding	ostA,imp	role in outermembrane permeability	COG1452	Cell wall/membrane/envelope biogenesis
HPG27_RS06095	NC_011333.1	1281668	1282147	-	protein_coding	HPG27_RS06095	RDD family protein	COG1714	Unknown function
HPG27_RS06100	NC_011333.1	1282196	1283470	-	protein_coding	purD	phosphoribosylamine--glycine ligase	COG0151	Nucleotide transport and metabolism
HPG27_RS06105	NC_011333.1	1283590	1283781	+	protein_coding	HPG27_RS06105	hypothetical protein	-	Unknown function
HPG27_RS06110	NC_011333.1	1283783	1284469	-	protein_coding	yhcG	ABC transporter ATP-binding protein	COG1131	Defense mechanisms
HPG27_RS06115	NC_011333.1	1284463	1285167	-	protein_coding	uppS	UDP pyrophosphate synthase	COG0020	Lipid transport and metabolism
HPG27_RS06120	NC_011333.1	1285207	1288053	-	protein_coding	dld	lactate dehydrogenase	COG0277	Energy production and conversion
HPG27_RS06125	NC_011333.1	1288119	1288451	+	protein_coding	HPG27_RS06125	rhodanese	COG0607	Inorganic ion transport and metabolism
HPG27_RS06130	NC_011333.1	1288454	1289134	+	protein_coding	hemD	uroporphyrinogen-III synthase	COG1587	Coenzyme transport and metabolism
HPG27_RS06135	NC_011333.1	1289181	1289573	+	protein_coding	crcB	camphor resistance protein CrcB	COG0239	Inorganic ion transport and metabolism;Cell cycle control, cell division, chromosome partitioning
HPG27_RS06140	NC_011333.1	1289620	1290678	-	protein_coding	hemN2,hemN	coproporphyrinogen III oxidase	COG0635	Coenzyme transport and metabolism
HPG27_RS06145	NC_011333.1	1290754	1291044	+	protein_coding	cytc553	cytochrome c biogenesis protein CcmH	COG2863	Energy production and conversion
HPG27_RS06150	NC_011333.1	1291205	1291672	+	protein_coding	nudH,invA,mutT	RNA pyrophosphohydrolase	COG0494	Defense mechanisms
HPG27_RS06155	NC_011333.1	1291674	1292891	+	protein_coding	lysC	aspartate kinase	COG0527	Amino acid transport and metabolism
HPG27_RS06160	NC_011333.1	1292888	1293430	+	protein_coding	HPG27_RS06160	hypothetical protein	-	Unknown function
HPG27_RS06165	NC_011333.1	1293427	1294083	+	protein_coding	holB	DNA polymerase III subunit delta'	-	Unknown function
HPG27_RS06170	NC_011333.1	1294080	1295222	+	protein_coding	folP	dihydropteroate synthase	COG0294	Coenzyme transport and metabolism
HPG27_RS06175	NC_011333.1	1295244	1295705	-	protein_coding	HPG27_RS06175	hypothetical protein	-	Unknown function
HPG27_RS06180	NC_011333.1	1296100	1296996	+	protein_coding	HPG27_RS06180	membrane protein	COG0697	Amino acid transport and metabolism;Carbohydrate transport and metabolism
HPG27_RS06185	NC_011333.1	1297000	1298247	+	protein_coding	HPG27_RS06185	membrane protein	-	Unknown function
HPG27_RS06190	NC_011333.1	1298327	1298878	+	protein_coding	HPG27_RS06190	hypothetical protein	COG2952	Unknown function
HPG27_RS06195	NC_011333.1	1298878	1300005	+	protein_coding	pyrAa	carbamoyl phosphate synthase small subunit	COG0505	Amino acid transport and metabolism;Nucleotide transport and metabolism
HPG27_RS06200	NC_011333.1	1300170	1301174	+	protein_coding	amiF	formamidase	COG0388	Unknown function
HPG27_RS06205	NC_011333.1	1301253	1301510	-	protein_coding	HPG27_RS06205	hypothetical protein	-	Unknown function
HPG27_RS06210	NC_011333.1	1301625	1302197	-	protein_coding	maf	maf-like protein	-	Unknown function
HPG27_RS06220	NC_011333.1	1304861	1305091	+	protein_coding	HPG27_RS06220	hypothetical protein	COG2841	Unknown function
HPG27_RS06235	NC_011333.1	1308521	1308778	-	protein_coding	rps18,rpsR	30S ribosomal protein S18	COG0238	Translation, ribosomal structure and biogenesis
HPG27_RS06240	NC_011333.1	1308801	1309346	-	protein_coding	HPG27_RS06240	single-stranded DNA-binding protein	COG0629	Replication, recombination and repair
HPG27_RS06245	NC_011333.1	1309356	1309784	-	protein_coding	rps6,rpsF	30S ribosomal protein S6	COG0360	Translation, ribosomal structure and biogenesis
HPG27_RS06250	NC_011333.1	1309937	1310959	-	protein_coding	holA	DNA polymerase III subunit delta	COG1466	Replication, recombination and repair
HPG27_RS06255	NC_011333.1	1310949	1312883	-	protein_coding	rnr,vacB	ribonuclease R	COG0557	Transcription
HPG27_RS06260	NC_011333.1	1312883	1313674	-	protein_coding	aroE	shikimate dehydrogenase	COG0169	Amino acid transport and metabolism
HPG27_RS06265	NC_011333.1	1313682	1314272	-	protein_coding	HPG27_RS06265	hypothetical protein	-	Unknown function
HPG27_RS06270	NC_011333.1	1314281	1315327	-	protein_coding	oppB	microcin C ABC transporter permease YejB	COG4174	Secondary metabolites biosynthesis, transport and catabolism
HPG27_RS06280	NC_011333.1	1317107	1318126	-	protein_coding	trpS	tryptophan--tRNA ligase	COG0180	Translation, ribosomal structure and biogenesis
HPG27_RS06285	NC_011333.1	1318158	1318880	-	protein_coding	bioC	biotin synthase	-	Unknown function
HPG27_RS06290	NC_011333.1	1318998	1319597	+	protein_coding	secG	preprotein translocase subunit SecG	COG1314	Intracellular trafficking, secretion, and vesicular transport
HPG27_RS06295	NC_011333.1	1319597	1320154	+	protein_coding	frr	ribosome-recycling factor	COG0233	Translation, ribosomal structure and biogenesis
HPG27_RS06300	NC_011333.1	1320158	1320763	+	protein_coding	pyrE	orotate phosphoribosyltransferase	COG0461	Nucleotide transport and metabolism
HPG27_RS06305	NC_011333.1	1320753	1321217	+	protein_coding	HPG27_RS06305	RDD family protein	COG1714	Unknown function
HPG27_RS06310	NC_011333.1	1321214	1321903	+	protein_coding	HPG27_RS06310	NAD-dependent deacylase	COG0846	Posttranslational modification, protein turnover, chaperones
HPG27_RS06315	NC_011333.1	1322011	1322412	+	protein_coding	nuoA,NQO7	NADH dehydrogenase subunit A	COG0838	Energy production and conversion
HPG27_RS06320	NC_011333.1	1322412	1322891	+	protein_coding	nuoB,NQO6	NADH-quinone oxidoreductase subunit B	COG0377	Energy production and conversion
HPG27_RS06325	NC_011333.1	1322888	1323688	+	protein_coding	nuoC,NQO5	NADH dehydrogenase subunit C	COG0852	Energy production and conversion
HPG27_RS06330	NC_011333.1	1323690	1324919	+	protein_coding	nuoD,NQO4	NADH-quinone oxidoreductase subunit D	COG0649	Energy production and conversion
HPG27_RS06335	NC_011333.1	1324916	1325146	+	protein_coding	nuoE	hypothetical protein	-	Unknown function
HPG27_RS06340	NC_011333.1	1325149	1326135	+	protein_coding	nuoF	hypothetical protein	-	Unknown function
HPG27_RS06345	NC_011333.1	1326132	1328696	+	protein_coding	nuoG,NQO3	NADH dehydrogenase subunit G	COG1034	Energy production and conversion
HPG27_RS06350	NC_011333.1	1328693	1329682	+	protein_coding	nuoH,NQO8	NADH-quinone oxidoreductase subunit H	COG1005	Energy production and conversion
HPG27_RS06355	NC_011333.1	1329693	1330355	+	protein_coding	nuoI,NQO9	NADH-quinone oxidoreductase subunit I	COG1143	Energy production and conversion
HPG27_RS06360	NC_011333.1	1330348	1330896	+	protein_coding	nuoJ,NQO10	NADH:ubiquinone oxidoreductase subunit J	COG0839	Energy production and conversion
HPG27_RS06365	NC_011333.1	1330893	1331195	+	protein_coding	nuoK,NQO11	NADH-quinone oxidoreductase subunit K	COG0713	Energy production and conversion
HPG27_RS06370	NC_011333.1	1331198	1333036	+	protein_coding	nuoL,NQO12	NADH dehydrogenase subunit L	COG1009	Energy production and conversion;Inorganic ion transport and metabolism
HPG27_RS06380	NC_011333.1	1334568	1336046	+	protein_coding	nuoN,NQO14	NADH-quinone oxidoreductase subunit N	COG1007	Energy production and conversion
HPG27_RS06385	NC_011333.1	1336036	1338441	+	protein_coding	pflA	paralysed flagella protein (pflA)	-	Unknown function
HPG27_RS06390	NC_011333.1	1338443	1339822	+	protein_coding	algC,manB	phospho-sugar mutase	COG1109	Carbohydrate transport and metabolism
HPG27_RS06395	NC_011333.1	1339999	1340259	+	protein_coding	HPG27_RS06395	hypothetical protein	-	Unknown function
HPG27_RS06400	NC_011333.1	1340612	1340836	-	protein_coding	HPG27_RS06400	hypothetical protein	-	Unknown function
HPG27_RS06405	NC_011333.1	1341065	1341853	-	protein_coding	trpA	tryptophan synthase subunit alpha	COG0159	Amino acid transport and metabolism
HPG27_RS06410	NC_011333.1	1341850	1343031	-	protein_coding	trpB	tryptophan synthase subunit beta	COG0133	Amino acid transport and metabolism
HPG27_RS06415	NC_011333.1	1343033	1344391	-	protein_coding	trpCF,trpC	bifunctional indole-3-glycerol phosphate synthase/phosphoribosylanthranilate isomerase	COG0135	Amino acid transport and metabolism
HPG27_RS06420	NC_011333.1	1344384	1345391	-	protein_coding	trpD	anthranilate phosphoribosyltransferase	COG0547	Amino acid transport and metabolism
HPG27_RS06425	NC_011333.1	1345388	1345972	-	protein_coding	trpG,trpD	glutamine amidotransferase	COG0512	Coenzyme transport and metabolism;Amino acid transport and metabolism
HPG27_RS06430	NC_011333.1	1345969	1347471	-	protein_coding	trpE	anthranilate synthase component I	COG0147	Coenzyme transport and metabolism;Amino acid transport and metabolism
HPG27_RS06435	NC_011333.1	1347703	1347954	-	protein_coding	HPG27_RS06435	hypothetical protein	-	Unknown function
HPG27_RS06440	NC_011333.1	1348125	1349387	+	protein_coding	HPG27_RS06440	hypothetical protein	COG0859	Cell wall/membrane/envelope biogenesis
HPG27_RS06445	NC_011333.1	1349606	1350511	-	protein_coding	HPG27_RS06445	DNA adenine methylase	COG0338	Replication, recombination and repair
HPG27_RS06465	NC_011333.1	1352064	1353521	-	protein_coding	HPG27_RS06465	hypothetical protein	COG0859	Cell wall/membrane/envelope biogenesis
HPG27_RS06470	NC_011333.1	1353618	1354658	-	protein_coding	HPG27_RS06470	hypothetical protein	COG0859	Cell wall/membrane/envelope biogenesis
HPG27_RS06475	NC_011333.1	1354726	1355463	-	protein_coding	aphA	5'-nucleotidase, lipoprotein e(P4) family	COG2503	Unknown function
HPG27_RS06480	NC_011333.1	1355587	1356135	+	protein_coding	HPG27_RS06480	polyisoprenoid-binding protein	COG2353	Unknown function
HPG27_RS06485	NC_011333.1	1356723	1357379	+	protein_coding	tenA	thiaminase II	COG0819	Coenzyme transport and metabolism
HPG27_RS06490	NC_011333.1	1357501	1358163	+	protein_coding	pnuC	nicotinamide mononucleotide transporter	COG3201	Coenzyme transport and metabolism
HPG27_RS06495	NC_011333.1	1358151	1358765	+	protein_coding	HPG27_RS06495	thiamine pyrophosphokinase	COG1564	Coenzyme transport and metabolism
HPG27_RS06500	NC_011333.1	1359473	1359823	-	protein_coding	rpl17,rplQ	50S ribosomal protein L17	COG0203	Translation, ribosomal structure and biogenesis
HPG27_RS06510	NC_011333.1	1360868	1361494	-	protein_coding	rps4,rpsD	30S ribosomal protein S4	COG0522	Translation, ribosomal structure and biogenesis
HPG27_RS06515	NC_011333.1	1361504	1361899	-	protein_coding	rps11	30S ribosomal protein S11	COG0100	Translation, ribosomal structure and biogenesis
HPG27_RS06520	NC_011333.1	1361922	1362284	-	protein_coding	rps13,rpsM	30S ribosomal protein S13	COG0099	Translation, ribosomal structure and biogenesis
HPG27_RS06525	NC_011333.1	1362288	1362401	-	protein_coding	rpl36,rpmJ	50S ribosomal protein L36	COG0257	Translation, ribosomal structure and biogenesis
HPG27_RS06530	NC_011333.1	1362479	1362697	-	protein_coding	infA	translation initiation factor IF-1	COG0361	Translation, ribosomal structure and biogenesis
HPG27_RS06535	NC_011333.1	1362697	1363458	-	protein_coding	map	type I methionyl aminopeptidase	COG0024	Translation, ribosomal structure and biogenesis
HPG27_RS06540	NC_011333.1	1363458	1364720	-	protein_coding	secY	protein translocase subunit SecY	COG0201	Intracellular trafficking, secretion, and vesicular transport
HPG27_RS06545	NC_011333.1	1364760	1365161	-	protein_coding	rpl15,rplO	50S ribosomal protein L15	COG0200	Translation, ribosomal structure and biogenesis
HPG27_RS06550	NC_011333.1	1365179	1365622	-	protein_coding	rps5,rpsE	30S ribosomal protein S5	COG0098	Translation, ribosomal structure and biogenesis
HPG27_RS06555	NC_011333.1	1365637	1365993	-	protein_coding	rpl18,rplR	50S ribosomal protein L18	COG0256	Translation, ribosomal structure and biogenesis
HPG27_RS06560	NC_011333.1	1366007	1366543	-	protein_coding	rpl6,rplF	50S ribosomal protein L6	COG0097	Translation, ribosomal structure and biogenesis
HPG27_RS06565	NC_011333.1	1366554	1366949	-	protein_coding	rps8,rpsH	30S ribosomal protein S8	COG0096	Translation, ribosomal structure and biogenesis
HPG27_RS06570	NC_011333.1	1366959	1367144	-	protein_coding	rps14,rpS14,rpsN	30S ribosomal protein S14 type Z	COG0199	Translation, ribosomal structure and biogenesis
HPG27_RS06575	NC_011333.1	1367154	1367699	-	protein_coding	rpl5,rplE	50S ribosomal protein L5	COG0094	Translation, ribosomal structure and biogenesis
HPG27_RS06580	NC_011333.1	1367712	1367906	-	protein_coding	rpl24,rplX	50S ribosomal protein L24	COG0198	Translation, ribosomal structure and biogenesis
HPG27_RS06585	NC_011333.1	1367934	1368302	-	protein_coding	rpl14,rplN	50S ribosomal protein L14	COG0093	Translation, ribosomal structure and biogenesis
HPG27_RS06590	NC_011333.1	1368305	1368565	-	protein_coding	rps17,rpsQ	30S ribosomal protein S17	COG0186	Translation, ribosomal structure and biogenesis
HPG27_RS06595	NC_011333.1	1368579	1368779	-	protein_coding	rpl29,rpmC	50S ribosomal protein L29	COG0255	Translation, ribosomal structure and biogenesis
HPG27_RS06600	NC_011333.1	1368766	1369191	-	protein_coding	rpl16,rplP	50S ribosomal protein L16	COG0197	Translation, ribosomal structure and biogenesis
HPG27_RS06605	NC_011333.1	1369194	1369898	-	protein_coding	rps3,rpsC	30S ribosomal protein S3	COG0092	Translation, ribosomal structure and biogenesis
HPG27_RS06610	NC_011333.1	1369902	1370270	-	protein_coding	rpl22,rplV	50S ribosomal protein L22	COG0091	Translation, ribosomal structure and biogenesis
HPG27_RS06615	NC_011333.1	1370280	1370561	-	protein_coding	rps19,rpsS	30S ribosomal protein S19	COG0185	Translation, ribosomal structure and biogenesis
HPG27_RS06620	NC_011333.1	1370572	1371402	-	protein_coding	rpl2,rplB	50S ribosomal protein L2	COG0090	Translation, ribosomal structure and biogenesis
HPG27_RS06625	NC_011333.1	1371418	1371699	-	protein_coding	rpl23,rplW	50S ribosomal protein L23	COG0089	Translation, ribosomal structure and biogenesis
HPG27_RS06630	NC_011333.1	1371703	1372350	-	protein_coding	rpl4,rplD	50S ribosomal protein L4	COG0088	Translation, ribosomal structure and biogenesis
HPG27_RS06635	NC_011333.1	1372385	1372960	-	protein_coding	rpl3,rplC	50S ribosomal protein L3	COG0087	Translation, ribosomal structure and biogenesis
HPG27_RS06640	NC_011333.1	1372997	1373311	-	protein_coding	rps10,rpsJ	30S ribosomal protein S10	COG0051	Translation, ribosomal structure and biogenesis
HPG27_RS06645	NC_011333.1	1373476	1374609	+	protein_coding	HPG27_RS06645	hypothetical protein	COG1373	Unknown function
HPG27_RS06650	NC_011333.1	1374851	1375429	+	protein_coding	HPG27_RS06650	hypothetical protein	-	Unknown function
HPG27_RS06655	NC_011333.1	1375403	1376017	-	protein_coding	rnhB	ribonuclease HII	COG0164	Replication, recombination and repair
HPG27_RS06665	NC_011333.1	1376190	1377581	-	protein_coding	fumC	class II fumarate hydratase	COG0114	Energy production and conversion
HPG27_RS06670	NC_011333.1	1377756	1378133	+	protein_coding	crdA	copper resistance determinant, crdA	-	Unknown function
HPG27_RS06675	NC_011333.1	1378138	1379376	+	protein_coding	crdB	membrane protein	COG1538	Cell wall/membrane/envelope biogenesis
HPG27_RS06680	NC_011333.1	1379373	1380380	+	protein_coding	czcB2,czcB,czcB_2	hemolysin D	COG0845	Defense mechanisms;Cell wall/membrane/envelope biogenesis
HPG27_RS06685	NC_011333.1	1380381	1383494	+	protein_coding	czcA2,czcA,czcA_2	CusA/CzcA family heavy metal efflux RND transporter	COG3696	Inorganic ion transport and metabolism
HPG27_RS06690	NC_011333.1	1383497	1383844	-	protein_coding	azlD	hypothetical protein	COG1687	Amino acid transport and metabolism
HPG27_RS06695	NC_011333.1	1383838	1384524	-	protein_coding	azlC	azaleucine resistance protein AzlC	COG1296	Amino acid transport and metabolism
HPG27_RS06700	NC_011333.1	1384535	1385644	-	protein_coding	dnaJ2,dnaJ	molecular chaperone DnaJ	COG0484	Posttranslational modification, protein turnover, chaperones
HPG27_RS06705	NC_011333.1	1385768	1386898	+	protein_coding	HPG27_RS06705	hypothetical protein	-	Unknown function
HPG27_RS06710	NC_011333.1	1387118	1387786	+	protein_coding	HPG27_RS06710	helicase	COG1432	Unknown function
HPG27_RS06715	NC_011333.1	1387850	1388878	-	protein_coding	mnmA,trmU	tRNA 2-thiouridine(34) synthase MnmA	COG0482	Translation, ribosomal structure and biogenesis
HPG27_RS06720	NC_011333.1	1389016	1389777	+	protein_coding	HPG27_RS06720	molecular chaperone DnaJ	-	Unknown function
HPG27_RS06725	NC_011333.1	1389774	1390298	-	protein_coding	nadD	nicotinate (nicotinamide) nucleotide adenylyltransferase	COG1057	Coenzyme transport and metabolism
HPG27_RS06730	NC_011333.1	1390282	1390728	-	protein_coding	nikR	nickel-responsive transcriptional regulator NikR	COG0864	Transcription
HPG27_RS06735	NC_011333.1	1390988	1391488	+	protein_coding	exbB2,exbB,exb_2	TonB-system energizer ExbB	COG0811	Intracellular trafficking, secretion, and vesicular transport
HPG27_RS06740	NC_011333.1	1391485	1391874	+	protein_coding	exbD2,exbD,exbD_2	biopolymer transporter ExbD	COG0848	Intracellular trafficking, secretion, and vesicular transport
HPG27_RS06745	NC_011333.1	1391840	1392697	+	protein_coding	tonB2,tonB	protein tonB	COG0810	Cell wall/membrane/envelope biogenesis
HPG27_RS06750	NC_011333.1	1392827	1393354	+	protein_coding	HPG27_RS06750	hypothetical protein	-	Unknown function
HPG27_RS06755	NC_011333.1	1393498	1394226	-	protein_coding	HPG27_RS06755	membrane protein	COG0861	Inorganic ion transport and metabolism
HPG27_RS06760	NC_011333.1	1394232	1395188	-	protein_coding	corA	magnesium and cobalt transport protein CorA	COG0598	Inorganic ion transport and metabolism
HPG27_RS06765	NC_011333.1	1395204	1396412	-	protein_coding	pgk	phosphoglycerate kinase	COG0126	Carbohydrate transport and metabolism
HPG27_RS06770	NC_011333.1	1396428	1397420	-	protein_coding	gap2,gap	type I glyceraldehyde-3-phosphate dehydrogenase	COG0057	Carbohydrate transport and metabolism
HPG27_RS06775	NC_011333.1	1397509	1398210	-	protein_coding	ung	uracil-DNA glycosylase	COG0692	Replication, recombination and repair
HPG27_RS06780	NC_011333.1	1398207	1398920	-	protein_coding	plsC	1-acyl-sn-glycerol-3-phosphate acyltransferase	COG0204	Lipid transport and metabolism
HPG27_RS06785	NC_011333.1	1398907	1400022	-	protein_coding	HPG27_RS06785	hypothetical protein	-	Unknown function
HPG27_RS06790	NC_011333.1	1400086	1401465	-	protein_coding	prc	peptidase S41	COG0793	Posttranslational modification, protein turnover, chaperones
HPG27_RS06795	NC_011333.1	1401672	1402544	-	protein_coding	hypAIVR	restriction endonuclease	-	Unknown function
HPG27_RS06800	NC_011333.1	1402544	1403623	-	protein_coding	hpyAIVM,hpy99IXM,HINFIM	site-specific DNA-methyltransferase	COG0863	Replication, recombination and repair
HPG27_RS06805	NC_011333.1	1403873	1407241	-	protein_coding	HPG27_RS06805	DNA methyltransferase	-	Unknown function
HPG27_RS06810	NC_011333.1	1407266	1408087	-	protein_coding	nadC	nicotinate-nucleotide diphosphorylase (carboxylating)	COG0157	Coenzyme transport and metabolism
HPG27_RS06815	NC_011333.1	1408087	1409097	-	protein_coding	nadA	quinolinate synthetase	COG0379	Coenzyme transport and metabolism
HPG27_RS06820	NC_011333.1	1409087	1409890	-	protein_coding	psd	phosphatidylserine decarboxylase	COG0688	Lipid transport and metabolism
HPG27_RS06825	NC_011333.1	1409884	1410390	-	protein_coding	HPG27_RS06825	hypothetical protein	-	Unknown function
HPG27_RS06830	NC_011333.1	1410403	1410888	-	protein_coding	HPG27_RS06830	hypothetical protein	-	Unknown function
HPG27_RS06840	NC_011333.1	1411802	1413031	-	protein_coding	comEC,comE3	competence protein	COG0658	Unknown function
HPG27_RS06845	NC_011333.1	1413112	1414578	-	protein_coding	dnaB	replicative DNA helicase	COG0305	Replication, recombination and repair
HPG27_RS06850	NC_011333.1	1414589	1415989	-	protein_coding	nnr	bifunctional ADP-dependent NAD(P)H-hydrate dehydratase/NAD(P)H-hydrate epimerase	COG0063	Nucleotide transport and metabolism
HPG27_RS06855	NC_011333.1	1415992	1417194	-	protein_coding	crdS	two-component sensor histidine kinase	COG0642	Signal transduction mechanisms
HPG27_RS06860	NC_011333.1	1417160	1417801	-	protein_coding	crdR	DNA-binding response regulator	COG0745	Transcription;Signal transduction mechanisms
HPG27_RS06870	NC_011333.1	1420342	1423242	+	protein_coding	HPG27_RS06870	type III restriction endonuclease subunit R	-	Unknown function
HPG27_RS06875	NC_011333.1	1423293	1424039	-	protein_coding	mreC	rod shape-determining protein MreC	COG1792	Cell cycle control, cell division, chromosome partitioning
HPG27_RS06880	NC_011333.1	1424043	1425086	-	protein_coding	mreB,mbl	rod shape-determining protein	COG1077	Cell cycle control, cell division, chromosome partitioning
HPG27_RS06885	NC_011333.1	1425129	1426475	-	protein_coding	cplX,clpX	ATP-dependent Clp protease ATP-binding subunit ClpX	COG1219	Posttranslational modification, protein turnover, chaperones
HPG27_RS06890	NC_011333.1	1426477	1427289	-	protein_coding	lpxA	acyl-[acyl-carrier-protein]--UDP-N-acetylglucosamine O-acyltransferase	COG1043	Cell wall/membrane/envelope biogenesis
HPG27_RS06895	NC_011333.1	1427292	1427771	-	protein_coding	fabZ	beta-hydroxyacyl-ACP dehydratase	COG0764	Lipid transport and metabolism
HPG27_RS06900	NC_011333.1	1427942	1428280	-	protein_coding	fliW2	flagellar biosynthesis protein FliW	COG1699	Cell motility
HPG27_RS06905	NC_011333.1	1428732	1429394	+	protein_coding	comL,bamD	outer membrane protein assembly factor BamD	COG4105	Cell wall/membrane/envelope biogenesis
HPG27_RS06910	NC_011333.1	1429437	1431914	+	protein_coding	lon	endopeptidase La	COG0466	Posttranslational modification, protein turnover, chaperones
HPG27_RS06915	NC_011333.1	1431923	1432750	+	protein_coding	tyrA	prephenate dehydrogenase	COG0287	Amino acid transport and metabolism
HPG27_RS06925	NC_011333.1	1433078	1433755	-	protein_coding	HPG27_RS06925	endonuclease	COG1864	Nucleotide transport and metabolism
HPG27_RS06930	NC_011333.1	1434221	1435933	-	protein_coding	HPG27_RS06930	hypothetical protein	COG2189	Replication, recombination and repair
HPG27_RS06935	NC_011333.1	1435927	1438383	-	protein_coding	HPG27_RS06935	restriction endonuclease	COG3421	Unknown function
HPG27_RS06940	NC_011333.1	1438681	1439529	+	protein_coding	bioB	biotin synthase	COG0502	Coenzyme transport and metabolism
HPG27_RS06945	NC_011333.1	1439529	1440407	+	protein_coding	rhn	ribonuclease N	COG1295	Unknown function
HPG27_RS06950	NC_011333.1	1440460	1440666	-	protein_coding	HPG27_RS06950	hypothetical protein	-	Unknown function
HPG27_RS06975	NC_011333.1	1445305	1445790	+	protein_coding	HPG27_RS06975	hypothetical protein	-	Unknown function
HPG27_RS06980	NC_011333.1	1445790	1447589	+	protein_coding	HPG27_RS06980	hypothetical protein	COG1479	Unknown function
HPG27_RS06985	NC_011333.1	1447740	1448645	+	protein_coding	HPG27_RS06985	hypothetical protein	-	Unknown function
HPG27_RS06990	NC_011333.1	1448758	1449204	-	protein_coding	HPG27_RS06990	NADPH-dependent 7-cyano-7-deazaguanine reductase QueF	COG0780	Translation, ribosomal structure and biogenesis
HPG27_RS06995	NC_011333.1	1449264	1449605	+	protein_coding	HPG27_RS06995	ribosome silencing factor RsfS	COG0799	Translation, ribosomal structure and biogenesis
HPG27_RS07000	NC_011333.1	1449613	1450506	+	protein_coding	miaA	tRNA (adenosine(37)-N6)-dimethylallyltransferase MiaA	COG0324	Translation, ribosomal structure and biogenesis
HPG27_RS07005	NC_011333.1	1450511	1451614	+	protein_coding	rfaJ3,rfaJ	LPS 1,2-glucosyltransferase	COG1442	Cell wall/membrane/envelope biogenesis
HPG27_RS07010	NC_011333.1	1451630	1452448	+	protein_coding	HPG27_RS07010	hypothetical protein	COG2194	Cell wall/membrane/envelope biogenesis
HPG27_RS07015	NC_011333.1	1452430	1453281	+	protein_coding	HPG27_RS07015	hypothetical protein	COG2194	Cell wall/membrane/envelope biogenesis
HPG27_RS07020	NC_011333.1	1453342	1454121	-	protein_coding	murB	UDP-N-acetylenolpyruvoylglucosamine reductase	COG0812	Cell wall/membrane/envelope biogenesis
HPG27_RS07025	NC_011333.1	1454125	1454391	-	protein_coding	fliQ	flagellar biosynthetic protein FliQ	COG1987	Cell motility
HPG27_RS07030	NC_011333.1	1454402	1455706	-	protein_coding	fliI	ATP synthase	COG1157	Intracellular trafficking, secretion, and vesicular transport;Cell motility
HPG27_RS07035	NC_011333.1	1455707	1456621	-	protein_coding	trbB	conjugal transfer protein TrbB	COG0630	Intracellular trafficking, secretion, and vesicular transport
HPG27_RS07040	NC_011333.1	1456638	1459400	-	protein_coding	ileS	isoleucine--tRNA ligase	COG0060	Translation, ribosomal structure and biogenesis
HPG27_RS07045	NC_011333.1	1459425	1459679	-	protein_coding	HPG27_RS07045	hypothetical protein	COG1188	Translation, ribosomal structure and biogenesis
HPG27_RS07050	NC_011333.1	1459781	1460407	+	protein_coding	HPG27_RS07050	hypothetical protein	-	Unknown function
HPG27_RS07055	NC_011333.1	1460456	1460677	-	protein_coding	HPG27_RS07055	hypothetical protein	-	Unknown function
HPG27_RS07060	NC_011333.1	1460831	1461904	-	protein_coding	rlmN	23S rRNA (adenine(2503)-C(2))-methyltransferase RlmN	COG0820	Translation, ribosomal structure and biogenesis
HPG27_RS07065	NC_011333.1	1461901	1462890	-	protein_coding	kpsF	KpsF/GutQ family sugar-phosphate isomerase	COG0794	Cell wall/membrane/envelope biogenesis;Carbohydrate transport and metabolism;Signal transduction mechanisms
HPG27_RS07070	NC_011333.1	1462874	1464943	-	protein_coding	HPG27_RS07070	ribonuclease J	COG0595	Translation, ribosomal structure and biogenesis
HPG27_RS07075	NC_011333.1	1464983	1465798	-	protein_coding	ksgA	ribosomal RNA small subunit methyltransferase A	COG0030	Translation, ribosomal structure and biogenesis
HPG27_RS07080	NC_011333.1	1466052	1466273	+	protein_coding	HPG27_RS07080	nickel transporter	-	Unknown function
HPG27_RS07095	NC_011333.1	1469369	1470250	-	protein_coding	purU	formyltetrahydrofolate deformylase	COG0788	Nucleotide transport and metabolism
HPG27_RS07100	NC_011333.1	1470253	1471131	-	protein_coding	sppA,PspA	signal peptide peptidase SppA	COG0616	Posttranslational modification, protein turnover, chaperones
HPG27_RS07105	NC_011333.1	1471202	1471447	+	protein_coding	HPG27_RS07105	hypothetical protein	-	Unknown function
HPG27_RS07110	NC_011333.1	1471686	1472363	+	protein_coding	HPG27_RS07110	hypothetical protein	-	Unknown function
HPG27_RS07115	NC_011333.1	1472372	1472851	+	protein_coding	HPG27_RS07115	hypothetical protein	-	Unknown function
HPG27_RS07120	NC_011333.1	1472862	1473329	+	protein_coding	HPG27_RS07120	hypothetical protein	-	Unknown function
HPG27_RS07125	NC_011333.1	1473895	1474236	-	protein_coding	HPG27_RS07125	hypothetical protein	-	Unknown function
HPG27_RS07135	NC_011333.1	1476630	1477418	-	protein_coding	HPG27_RS07135	hypothetical protein	-	Unknown function
HPG27_RS07140	NC_011333.1	1477539	1478030	+	protein_coding	ppiB,ppi	peptidylprolyl isomerase	COG0652	Posttranslational modification, protein turnover, chaperones
HPG27_RS07145	NC_011333.1	1478048	1478278	+	protein_coding	csrA	carbon storage regulator	COG1551	Signal transduction mechanisms
HPG27_RS07150	NC_011333.1	1478275	1479081	+	protein_coding	ispE	4-(cytidine 5'-diphospho)-2-C-methyl-D-erythritol kinase	COG1947	Lipid transport and metabolism
HPG27_RS07155	NC_011333.1	1479078	1479536	+	protein_coding	smpB	SsrA-binding protein	COG0691	Posttranslational modification, protein turnover, chaperones
HPG27_RS07160	NC_011333.1	1479539	1479991	+	protein_coding	exbB3,exbB,exbB_3	TonB-system energizer ExbB	COG0811	Intracellular trafficking, secretion, and vesicular transport
HPG27_RS07165	NC_011333.1	1480002	1480403	+	protein_coding	exbD3,exbD,exbD_3	biopolymer transporter ExbD	COG0848	Intracellular trafficking, secretion, and vesicular transport
HPG27_RS07170	NC_011333.1	1480475	1480609	+	protein_coding	rpl34,rpmH	50S ribosomal protein L34	COG0230	Translation, ribosomal structure and biogenesis
HPG27_RS07180	NC_011333.1	1481040	1481393	+	protein_coding	HPG27_RS07180	membrane protein insertion efficiency factor YidD	COG0759	Cell wall/membrane/envelope biogenesis
HPG27_RS07185	NC_011333.1	1481399	1483045	+	protein_coding	yajC	membrane protein insertase YidC	COG0706	Cell wall/membrane/envelope biogenesis
HPG27_RS07190	NC_011333.1	1483045	1483842	+	protein_coding	HPG27_RS07190	SpoIIIJ-associated protein	-	Unknown function
HPG27_RS07195	NC_011333.1	1483802	1485187	+	protein_coding	trmE,thdF,tdhF	tRNA modification GTPase TrmE	COG0486	Translation, ribosomal structure and biogenesis
HPG27_RS07200	NC_011333.1	1485406	1487658	+	protein_coding	homD	membrane protein	-	Unknown function
HPG27_RS07205	NC_011333.1	1487675	1487869	-	protein_coding	HPG27_RS07205	hypothetical protein	-	Unknown function
HPG27_RS07210	NC_011333.1	1488480	1489391	-	protein_coding	HPG27_RS07210	hypothetical protein	-	Unknown function
HPG27_RS07215	NC_011333.1	1489400	1489795	-	protein_coding	HPG27_RS07215	hypothetical protein	-	Unknown function
HPG27_RS07220	NC_011333.1	1489752	1490279	-	protein_coding	lpp20	LPP20 lipoprotein	-	Unknown function
HPG27_RS07225	NC_011333.1	1490303	1490935	-	protein_coding	FlgN	penicillin-binding protein activator LpoB	COG3417	Cell wall/membrane/envelope biogenesis
HPG27_RS07230	NC_011333.1	1491352	1491666	-	protein_coding	trx2	thiol reductase thioredoxin	-	Unknown function
HPG27_RS07235	NC_011333.1	1491721	1492509	-	protein_coding	rluB	RNA pseudouridine synthase	COG1187	Translation, ribosomal structure and biogenesis
HPG27_RS07240	NC_011333.1	1492491	1496126	-	protein_coding	dnaE	DNA polymerase III subunit alpha	COG0587	Replication, recombination and repair
HPG27_RS07245	NC_011333.1	1496274	1497326	+	protein_coding	HPG27_RS07245	cytochrome c biogenesis protein CcsA	COG1858	Posttranslational modification, protein turnover, chaperones
HPG27_RS07250	NC_011333.1	1497506	1498024	-	protein_coding	HPG27_RS07250	flagellar motility secretory protein	COG3187	Posttranslational modification, protein turnover, chaperones
HPG27_RS07255	NC_011333.1	1498112	1498789	-	protein_coding	HPG27_RS07255	hypothetical protein	-	Unknown function
HPG27_RS07260	NC_011333.1	1498792	1499607	-	protein_coding	HPG27_RS07260	glycoside hydrolase family 43	COG1463	Cell wall/membrane/envelope biogenesis
HPG27_RS07265	NC_011333.1	1499592	1500377	-	protein_coding	HPG27_RS07265	ABC transporter ATP-binding protein	COG1127	Cell wall/membrane/envelope biogenesis
HPG27_RS07270	NC_011333.1	1500377	1501510	-	protein_coding	HPG27_RS07270	ABC transporter	COG0767	Cell wall/membrane/envelope biogenesis
HPG27_RS07275	NC_011333.1	1501644	1502339	+	protein_coding	HPG27_RS07275	membrane protein	-	Unknown function
HPG27_RS07280	NC_011333.1	1502344	1503366	-	protein_coding	ilvE	branched chain amino acid aminotransferase	COG0115	Amino acid transport and metabolism;Coenzyme transport and metabolism
HPG27_RS07285	NC_011333.1	1503418	1504164	-	protein_coding	horJ,hopV,omp31	membrane protein	-	Unknown function
HPG27_RS07290	NC_011333.1	1504279	1506996	-	protein_coding	polA	DNA polymerase I	COG0749	Replication, recombination and repair
HPG27_RS07295	NC_011333.1	1507062	1508282	-	protein_coding	BCGIB	type II restriction endonuclease	-	Unknown function
HPG27_RS07300	NC_011333.1	1508279	1510318	-	protein_coding	mod	SAM-dependent methyltransferase	COG0286	Defense mechanisms
HPG27_RS07305	NC_011333.1	1510351	1510926	-	protein_coding	HPG27_RS07305	hypothetical protein	COG1040	Unknown function
HPG27_RS07310	NC_011333.1	1510914	1511489	-	protein_coding	tmK,tmk	thymidylate kinase	COG0125	Nucleotide transport and metabolism
HPG27_RS07315	NC_011333.1	1511491	1511964	-	protein_coding	coaD,kdtB	phosphopantetheine adenylyltransferase	COG0669	Coenzyme transport and metabolism
HPG27_RS07320	NC_011333.1	1511964	1512527	-	protein_coding	paaD	aromatic acid decarboxylase	COG0163	Coenzyme transport and metabolism
HPG27_RS07325	NC_011333.1	1512537	1513193	-	protein_coding	flgA	flagella basal body P-ring formation protein FlgA	COG1261	Cell motility
HPG27_RS07330	NC_011333.1	1513190	1515238	-	protein_coding	uvrD,rep	DNA helicase II	COG0210	Replication, recombination and repair
HPG27_RS07335	NC_011333.1	1515235	1517769	-	protein_coding	HPG27_RS07335	hypothetical protein	-	Unknown function
HPG27_RS07340	NC_011333.1	1517779	1519026	-	protein_coding	serS	serine--tRNA ligase	COG0172	Translation, ribosomal structure and biogenesis
HPG27_RS07345	NC_011333.1	1519027	1519824	-	protein_coding	HPG27_RS07345	nitrilase	COG0388	Unknown function
HPG27_RS07350	NC_011333.1	1519828	1520088	-	protein_coding	xseB	exodeoxyribonuclease 7 small subunit	COG1722	Replication, recombination and repair
HPG27_RS07355	NC_011333.1	1520098	1520838	-	protein_coding	ubiE,gerC2	bifunctional demethylmenaquinone methyltransferase/2-methoxy-6-polyprenyl-1,4-benzoquinol methylase	COG2226	Coenzyme transport and metabolism
HPG27_RS07360	NC_011333.1	1520865	1521311	-	protein_coding	HPG27_RS07360	membrane protein	COG1981	Unknown function
HPG27_RS07365	NC_011333.1	1521322	1521894	-	protein_coding	HPG27_RS07365	YigZ family protein	COG1739	Unknown function
HPG27_RS07370	NC_011333.1	1521881	1523011	-	protein_coding	HPG27_RS07370	antibiotic ABC transporter permease	COG0842	Defense mechanisms
HPG27_RS07375	NC_011333.1	1523008	1524105	-	protein_coding	HPG27_RS07375	ABC transporter	COG0842	Defense mechanisms
HPG27_RS07380	NC_011333.1	1524117	1525106	-	protein_coding	HPG27_RS07380	membrane protein	-	Unknown function
HPG27_RS07385	NC_011333.1	1525117	1526649	-	protein_coding	HPG27_RS07385	lipase	COG1538	Cell wall/membrane/envelope biogenesis
HPG27_RS07390	NC_011333.1	1526646	1527995	-	protein_coding	tlyC	efflux protein	COG1253	Unknown function
HPG27_RS07395	NC_011333.1	1528099	1529700	-	protein_coding	HPG27_RS07395	phosphate permease	COG0306	Inorganic ion transport and metabolism
HPG27_RS07400	NC_011333.1	1529841	1530110	+	protein_coding	HPG27_RS07400	NifU family protein	COG0694	Posttranslational modification, protein turnover, chaperones
HPG27_RS07405	NC_011333.1	1530122	1530733	+	protein_coding	HPG27_RS07405	hypothetical protein	-	Unknown function
HPG27_RS07410	NC_011333.1	1530737	1532080	+	protein_coding	murE	UDP-N-acetylmuramoyl-L-alanyl-D-glutamate--2,6-diaminopimelate ligase	COG0769	Cell wall/membrane/envelope biogenesis
HPG27_RS07415	NC_011333.1	1532084	1533034	+	protein_coding	tal	transaldolase	COG0176	Carbohydrate transport and metabolism
HPG27_RS07420	NC_011333.1	1533089	1533625	+	protein_coding	rpl25,ctc	50S ribosomal protein L25/general stress protein Ctc	COG1825	Translation, ribosomal structure and biogenesis
HPG27_RS07425	NC_011333.1	1533635	1534195	+	protein_coding	pth	peptidyl-tRNA hydrolase	COG0193	Translation, ribosomal structure and biogenesis
HPG27_RS07430	NC_011333.1	1534205	1535272	+	protein_coding	HPG27_RS07430	permease	COG0795	Cell wall/membrane/envelope biogenesis;Cell motility
HPG27_RS07435	NC_011333.1	1535329	1536330	+	protein_coding	HPG27_RS07435	adenine methyltransferase	-	Unknown function
HPG27_RS07440	NC_011333.1	1536327	1537226	+	protein_coding	HPG27_RS07440	DNA adenine methylase	COG0338	Replication, recombination and repair
HPG27_RS07450	NC_011333.1	1538902	1540068	-	protein_coding	hopK,hopW,omp32	hypothetical protein	-	Unknown function
HPG27_RS07455	NC_011333.1	1540247	1540684	+	protein_coding	HPG27_RS07455	hypothetical protein	COG3399	Unknown function
HPG27_RS07465	NC_011333.1	1543057	1543773	-	protein_coding	HPG27_RS07465	hypothetical protein	COG4123	Translation, ribosomal structure and biogenesis
HPG27_RS07470	NC_011333.1	1543755	1544789	-	protein_coding	ribD,ribG	bifunctional diaminohydroxyphosphoribosylaminopyrimidine deaminase/5-amino-6-(5-phosphoribosylamino)uracil reductase	COG0117	Coenzyme transport and metabolism
HPG27_RS07475	NC_011333.1	1544793	1546019	-	protein_coding	gltS	sodium/glutamate symporter	COG0786	Amino acid transport and metabolism
HPG27_RS07480	NC_011333.1	1546105	1547304	+	protein_coding	HPG27_RS07480	saccharopine dehydrogenase	COG1748	Amino acid transport and metabolism
HPG27_RS07485	NC_011333.1	1547314	1548690	-	protein_coding	fdxB	cytochrome c oxidase accessory protein CcoG	COG0348	Energy production and conversion
HPG27_RS07490	NC_011333.1	1548670	1549458	+	protein_coding	HPG27_RS07490	glycerol-3-phosphate acyltransferase	COG0344	Lipid transport and metabolism
HPG27_RS07495	NC_011333.1	1549455	1549808	+	protein_coding	folB	dihydroneopterin aldolase	COG1539	Coenzyme transport and metabolism
HPG27_RS07500	NC_011333.1	1549792	1550118	+	protein_coding	frpbB4	hypothetical protein	-	Unknown function
HPG27_RS07505	NC_011333.1	1550272	1552911	+	protein_coding	frpB3,frpB	TonB-dependent receptor	COG1629	Inorganic ion transport and metabolism
HPG27_RS07510	NC_011333.1	1553139	1554299	+	protein_coding	selA	L-seryl-tRNA(Sec) selenium transferase	COG1921	Translation, ribosomal structure and biogenesis
HPG27_RS07515	NC_011333.1	1554401	1555588	+	protein_coding	nusA	transcription termination/antitermination protein NusA	COG0195	Transcription
HPG27_RS07520	NC_011333.1	1555810	1556571	-	protein_coding	HPG27_RS07520	hypothetical protein	-	Unknown function
HPG27_RS07525	NC_011333.1	1556561	1556998	-	protein_coding	HPG27_RS07525	hypothetical protein	-	Unknown function
HPG27_RS07535	NC_011333.1	1557796	1561350	-	protein_coding	ECO57IR	hypothetical protein	COG1002	Defense mechanisms
HPG27_RS07555	NC_011333.1	1566402	1568273	-	protein_coding	recG	ATP-dependent DNA helicase RecG	COG1200	Replication, recombination and repair
HPG27_RS07560	NC_011333.1	1568355	1568708	+	protein_coding	HPG27_RS07560	hypothetical protein	-	Unknown function
HPG27_RS07570	NC_011333.1	1569343	1570095	-	protein_coding	exoA,lexA	exodeoxyribonuclease III	COG0708	Replication, recombination and repair
HPG27_RS07580	NC_011333.1	1570275	1571714	-	protein_coding	comH	hypothetical protein	-	Unknown function
HPG27_RS07585	NC_011333.1	1571935	1573302	-	protein_coding	dnaA	chromosomal replication initiator protein DnaA	COG0593	Replication, recombination and repair
HPG27_RS07590	NC_011333.1	1573454	1573996	+	protein_coding	punB	hypothetical protein	-	Unknown function
HPG27_RS07595	NC_011333.1	1574032	1574271	+	protein_coding	HPG27_RS07595	hypothetical protein	-	Unknown function
HPG27_RS07600	NC_011333.1	1574272	1576065	+	protein_coding	glmS	glutamine--fructose-6-phosphate aminotransferase	COG0449	Cell wall/membrane/envelope biogenesis
HPG27_RS07605	NC_011333.1	1576089	1576715	+	protein_coding	thyX	thymidylate synthase (FAD)	COG1351	Nucleotide transport and metabolism
HPG27_RS07615	NC_011333.1	1577620	1580064	-	protein_coding	hsdM3,hsdM	type I restriction-modification system subunit M	COG0286	Defense mechanisms
HPG27_RS07620	NC_011333.1	1580131	1583109	+	protein_coding	hsdR3,hsdR	restriction endonuclease subunit R	COG0610	Defense mechanisms
HPG27_RS07625	NC_011333.1	1583109	1583816	+	protein_coding	HPG27_RS07625	metal-dependent hydrolase	COG1451	Unknown function
HPG27_RS07630	NC_011333.1	1583885	1586410	-	protein_coding	fecA3,fecA,fecA_3	ligand-gated channel	COG4772	Inorganic ion transport and metabolism
HPG27_RS07635	NC_011333.1	1586762	1587730	-	protein_coding	rocF	arginase	COG0010	Amino acid transport and metabolism
HPG27_RS07640	NC_011333.1	1587935	1589077	+	protein_coding	ald	alanine dehydrogenase	COG0686	Amino acid transport and metabolism
HPG27_RS07645	NC_011333.1	1589200	1590921	+	protein_coding	HPG27_RS07645	hypothetical protein	COG1479	Unknown function
HPG27_RS07650	NC_011333.1	1590932	1591660	-	protein_coding	horL,omp30	membrane protein	-	Unknown function
HPG27_RS07655	NC_011333.1	1591846	1592700	+	protein_coding	ppnK	NAD(+) kinase	COG0061	Nucleotide transport and metabolism
HPG27_RS07660	NC_011333.1	1592714	1594288	+	protein_coding	recN	DNA repair protein RecN	COG0497	Replication, recombination and repair
HPG27_RS07665	NC_011333.1	1594285	1595592	+	protein_coding	HPG27_RS07665	hypothetical protein	COG1293	Translation, ribosomal structure and biogenesis
HPG27_RS07670	NC_011333.1	1595612	1595908	+	protein_coding	HPG27_RS07670	hypothetical protein	-	Unknown function
HPG27_RS07675	NC_011333.1	1596046	1597029	+	protein_coding	HPG27_RS07675	Sel1 repeat protein HcpG	COG0790	Signal transduction mechanisms
HPG27_RS07680	NC_011333.1	1597068	1597931	-	protein_coding	dnaQ	DNA polymerase III subunit epsilon	COG0847	Replication, recombination and repair
HPG27_RS07685	NC_011333.1	1597909	1598562	-	protein_coding	rpe	ribulose-phosphate 3-epimerase	COG0036	Carbohydrate transport and metabolism
HPG27_RS07690	NC_011333.1	1598633	1599505	+	protein_coding	fbp	fructose 1,6-bisphosphatase	-	Unknown function
HPG27_RS07695	NC_011333.1	1599502	1599708	+	protein_coding	HPG27_RS07695	hypothetical protein	-	Unknown function
HPG27_RS07700	NC_011333.1	1599721	1600617	+	protein_coding	HPG27_RS07700	hypothetical protein	-	Unknown function
HPG27_RS07710	NC_011333.1	1601463	1602320	-	protein_coding	fbcH,petC	cytochrome c	COG2857	Energy production and conversion
HPG27_RS07715	NC_011333.1	1602317	1603555	-	protein_coding	petB,fbcH	ubiquinol cytochrome C oxidoreductase	COG1290	Energy production and conversion
HPG27_RS07720	NC_011333.1	1603566	1604069	-	protein_coding	petA,fbcF	ubiquinol-cytochrome c reductase iron-sulfur subunit	COG0723	Energy production and conversion
HPG27_RS07725	NC_011333.1	1604193	1607192	-	protein_coding	trcF,mfd	transcription-repair coupling factor	COG1197	Replication, recombination and repair;Transcription
HPG27_RS07730	NC_011333.1	1607196	1607606	-	protein_coding	HPG27_RS07730	polymer-forming cytoskeletal family protein	COG1664	Cytoskeleton
HPG27_RS07735	NC_011333.1	1607525	1608463	-	protein_coding	tagE1,tagE	peptidase M23	COG0739	Cell wall/membrane/envelope biogenesis
HPG27_RS07740	NC_011333.1	1608472	1609398	-	protein_coding	tagE2,tagE	peptidase M23	COG0739	Cell wall/membrane/envelope biogenesis
HPG27_RS07745	NC_011333.1	1609398	1610567	-	protein_coding	folC	folylpolyglutamate synthase	COG0285	Coenzyme transport and metabolism
HPG27_RS07750	NC_011333.1	1610557	1611069	-	protein_coding	lptE	hypothetical protein	-	Unknown function
HPG27_RS07755	NC_011333.1	1611066	1613486	-	protein_coding	leuS	leucine--tRNA ligase	COG0495	Translation, ribosomal structure and biogenesis
HPG27_RS07760	NC_011333.1	1613497	1613835	-	protein_coding	HPG27_RS07760	hypothetical protein	-	Unknown function
HPG27_RS07765	NC_011333.1	1613845	1614816	-	protein_coding	secF	protein translocase subunit SecF	COG0341	Intracellular trafficking, secretion, and vesicular transport
HPG27_RS07770	NC_011333.1	1614825	1616402	-	protein_coding	secD	protein translocase subunit SecD	COG0342	Intracellular trafficking, secretion, and vesicular transport
HPG27_RS07775	NC_011333.1	1616389	1616781	-	protein_coding	yajC	preprotein translocase subunit YajC	COG1862	Intracellular trafficking, secretion, and vesicular transport
HPG27_RS07780	NC_011333.1	1616829	1618145	-	protein_coding	nhaA	Na+/H+ antiporter NhaA	COG3004	Inorganic ion transport and metabolism;Energy production and conversion
HPG27_RS07785	NC_011333.1	1618169	1621081	-	protein_coding	pcrA,prcA	recombination protein RecB	COG1074	Replication, recombination and repair
HPG27_RS07790	NC_011333.1	1621332	1622126	+	protein_coding	rps2,rpsB	30S ribosomal protein S2	COG0052	Translation, ribosomal structure and biogenesis
HPG27_RS07795	NC_011333.1	1622126	1623193	+	protein_coding	tfs,tsf	elongation factor Ts	COG0264	Translation, ribosomal structure and biogenesis
HPG27_RS07800	NC_011333.1	1623638	1625485	-	protein_coding	ftsI	cell division protein FstI	COG0768	Cell wall/membrane/envelope biogenesis;Cell cycle control, cell division, chromosome partitioning
HPG27_RS07805	NC_011333.1	1625641	1625970	-	protein_coding	fliE	flagellar hook-basal body complex protein FliE	COG1677	Cell motility
HPG27_RS07810	NC_011333.1	1626100	1626585	-	protein_coding	flgC	flagellar basal body rod protein FlgC	COG1558	Cell motility
HPG27_RS07815	NC_011333.1	1626598	1627020	-	protein_coding	flgB	flagellar basal body rod protein FlgB	COG1815	Cell motility
HPG27_RS07820	NC_011333.1	1627224	1628390	+	protein_coding	ftsW	cell division protein FtsW	COG0772	Cell cycle control, cell division, chromosome partitioning
HPG27_RS07825	NC_011333.1	1628410	1629411	-	protein_coding	ceuE2,ceuE	iron ABC transporter substrate-binding protein	COG0614	Inorganic ion transport and metabolism
HPG27_RS07830	NC_011333.1	1629651	1630247	+	protein_coding	tsaA	peroxidase	COG0450	Defense mechanisms
HPG27_RS07835	NC_011333.1	1630387	1631202	+	protein_coding	plpA	ABC transporter substrate-binding protein	COG1464	Inorganic ion transport and metabolism
HPG27_RS07845	NC_011333.1	1631701	1633467	-	protein_coding	pbpB,pbp2	penicillin-binding protein 2	COG0768	Cell wall/membrane/envelope biogenesis;Cell cycle control, cell division, chromosome partitioning
HPG27_RS07850	NC_011333.1	1633448	1633891	-	protein_coding	HPG27_RS07850	hypothetical protein	-	Unknown function
HPG27_RS07855	NC_011333.1	1633903	1634529	-	protein_coding	engB	GTP-binding protein	COG0218	Cell cycle control, cell division, chromosome partitioning
HPG27_RS07860	NC_011333.1	1634526	1635083	-	protein_coding	lptA	sugar ABC transporter substrate-binding protein	COG1934	Cell wall/membrane/envelope biogenesis
HPG27_RS07865	NC_011333.1	1635083	1635676	-	protein_coding	lptC	hypothetical protein	-	Unknown function
HPG27_RS07870	NC_011333.1	1635651	1636145	-	protein_coding	HPG27_RS07870	3-deoxy-D-manno-octulosonate 8-phosphate phosphatase	COG1778	Cell wall/membrane/envelope biogenesis
HPG27_RS07875	NC_011333.1	1636142	1637089	-	protein_coding	rlpA	hypothetical protein	COG0797	Cell wall/membrane/envelope biogenesis
HPG27_RS07880	NC_011333.1	1637089	1638201	-	protein_coding	dniR	lytic transglycosylase	COG1388	Cell wall/membrane/envelope biogenesis
HPG27_RS07885	NC_011333.1	1638295	1639059	-	protein_coding	tatD	TatD family hydrolase	COG0084	Cell motility
HPG27_RS07890	NC_011333.1	1639134	1639754	+	protein_coding	ribC	riboflavin synthase	COG0307	Coenzyme transport and metabolism
HPG27_RS07895	NC_011333.1	1639755	1640027	+	protein_coding	flhB2,flhB_2	flagellar biosynthesis protein FlhB	COG2257	Intracellular trafficking, secretion, and vesicular transport
HPG27_RS07900	NC_011333.1	1640049	1641032	+	protein_coding	metN	methionine ABC transporter ATP-binding protein	COG1135	Amino acid transport and metabolism
HPG27_RS07905	NC_011333.1	1641034	1641681	+	protein_coding	acbD,yaeE	ABC transporter permease	COG2011	Amino acid transport and metabolism
HPG27_RS07910	NC_011333.1	1641713	1642831	-	protein_coding	HPG27_RS07910	LPS biosynthesis protein	COG1442	Cell wall/membrane/envelope biogenesis
HPG27_RS07915	NC_011333.1	1642880	1643308	-	protein_coding	HPG27_RS07915	hypothetical protein	-	Unknown function
HPG27_RS07920	NC_011333.1	1643318	1643980	-	protein_coding	HPG27_RS07920	hypothetical protein	COG0671	Lipid transport and metabolism
HPG27_RS07925	NC_011333.1	1643911	1644921	-	protein_coding	wecA,llm	methicillin resistance protein	COG0472	Cell wall/membrane/envelope biogenesis
HPG27_RS07930	NC_011333.1	1645057	1645845	+	protein_coding	pdxJ	pyridoxine 5'-phosphate synthase	-	Unknown function
HPG27_RS07935	NC_011333.1	1645847	1646770	+	protein_coding	pdxA	4-hydroxythreonine-4-phosphate dehydrogenase	COG1995	Coenzyme transport and metabolism
HPG27_RS07940	NC_011333.1	1646834	1647856	+	protein_coding	gcp,tsaD	tRNA (adenosine(37)-N6)-threonylcarbamoyltransferase complex transferase subunit TsaD	COG0533	Translation, ribosomal structure and biogenesis
HPG27_RS07945	NC_011333.1	1648724	1649512	+	protein_coding	flgG2,flgG	flagellar basal body rod protein FlgG	COG4786	Cell motility
HPG27_RS07950	NC_011333.1	1649611	1650327	-	protein_coding	HPG27_RS07950	ubiquinol-cytochrome C chaperone family protein	COG4735	Unknown function
HPG27_RS07965	NC_011333.1	1651102	1651863	-	protein_coding	HPG27_RS07965	hypothetical protein	COG4735	Unknown function
HPG27_RS07980	NC_011334.1	485	2020	+	protein_coding	HPG27_RS07980	replication initiation protein	-	Unknown function
HPG27_RS07985	NC_011334.1	2065	2799	+	protein_coding	HPG27_RS07985	hypothetical protein	COG3177	Transcription
HPG27_RS07990	NC_011334.1	2849	3553	+	protein_coding	HPG27_RS07990	cAMP-induced filamentation protein	COG3177	Transcription
HPG27_RS07995	NC_011334.1	3672	4835	-	protein_coding	HPG27_RS07995	MFS transporter	-	Unknown function
HPG27_RS08000	NC_011334.1	4847	5899	-	protein_coding	HPG27_RS08000	hypothetical protein	COG0476	Coenzyme transport and metabolism
HPG27_RS08015	NC_011334.1	8150	8494	-	protein_coding	HPG27_RS08015	plasmid mobilization relaxosome protein MobC	-	Unknown function
HPG27_RS08020	NC_011334.1	8693	8974	+	protein_coding	HPG27_RS08020	hypothetical protein	-	Unknown function
HPG27_RS08025	NC_011334.1	8983	9252	+	protein_coding	HPG27_RS08025	YafQ family addiction module toxin	-	Unknown function
HPG27_RS08040	NC_011333.1	768033	768533	-	protein_coding	HPG27_RS08040	hypothetical protein	-	Unknown function
HPG27_RS08050	NC_011333.1	1013920	1014192	+	protein_coding	HPG27_RS08050	exonuclease VII large subunit	-	Unknown function
HPG27_RS08055	NC_011333.1	1086686	1086826	-	protein_coding	HPG27_RS08055	hypothetical protein	-	Unknown function
HPG27_RS08060	NC_011333.1	1650365	1650517	-	protein_coding	HPG27_RS08060	hypothetical protein	-	Unknown function
HPG27_RS08110	NC_011333.1	165967	166158	+	protein_coding	HPG27_RS08110	hypothetical protein	-	Unknown function
HPG27_RS08120	NC_011333.1	190535	190984	-	protein_coding	HPG27_RS08120	hypothetical protein	COG1479	Unknown function
HPG27_RS08125	NC_011333.1	345881	346093	-	protein_coding	HPG27_RS08125	hypothetical protein	-	Unknown function
HPG27_RS08135	NC_011333.1	348182	348448	+	protein_coding	HPG27_RS08135	hypothetical protein	-	Unknown function
HPG27_RS08140	NC_011333.1	348831	349127	+	protein_coding	HPG27_RS08140	hypothetical protein	-	Unknown function
HPG27_RS08145	NC_011333.1	366486	366731	+	protein_coding	HPG27_RS08145	hypothetical protein	-	Unknown function
HPG27_RS08155	NC_011333.1	435366	435527	-	protein_coding	HPG27_RS08155	hypothetical protein	-	Unknown function
HPG27_RS08160	NC_011333.1	463012	463194	-	protein_coding	HPG27_RS08160	hypothetical protein	-	Unknown function
HPG27_RS08165	NC_011333.1	463851	463946	-	protein_coding	HPG27_RS08165	hypothetical protein	-	Unknown function
HPG27_RS08175	NC_011333.1	536801	536983	+	protein_coding	HPG27_RS08175	hypothetical protein	-	Unknown function
HPG27_RS08190	NC_011333.1	700410	700502	+	protein_coding	HPG27_RS08190	hypothetical protein	-	Unknown function
HPG27_RS08200	NC_011333.1	766865	768010	-	protein_coding	HPG27_RS08200	rod shape-determining protein RodA	COG0772	Cell cycle control, cell division, chromosome partitioning
HPG27_RS08220	NC_011333.1	873801	874016	-	protein_coding	HPG27_RS08220	type I restriction endonuclease subunit M	-	Unknown function
HPG27_RS08245	NC_011333.1	930726	930932	+	protein_coding	HPG27_RS08245	hypothetical protein	-	Unknown function
HPG27_RS08250	NC_011333.1	963787	964170	-	protein_coding	HPG27_RS08250	hypothetical protein	-	Unknown function
HPG27_RS08255	NC_011333.1	992039	992401	-	protein_coding	HPG27_RS08255	hypothetical protein	-	Unknown function
HPG27_RS08260	NC_011333.1	1017130	1017453	-	protein_coding	HPG27_RS08260	hypothetical protein	-	Unknown function
HPG27_RS08265	NC_011333.1	1019536	1021785	-	protein_coding	HPG27_RS08265	hypothetical protein	-	Unknown function
HPG27_RS08270	NC_011333.1	1023065	1023238	-	protein_coding	HPG27_RS08270	hypothetical protein	-	Unknown function
HPG27_RS08280	NC_011333.1	1152581	1152766	+	protein_coding	HPG27_RS08280	hypothetical protein	-	Unknown function
HPG27_RS08305	NC_011333.1	1251663	1251956	+	protein_coding	HPG27_RS08305	hypothetical protein	-	Unknown function
HPG27_RS08320	NC_011333.1	1444945	1445247	+	protein_coding	HPG27_RS08320	hypothetical protein	-	Unknown function
HPG27_RS08335	NC_011333.1	1625492	1625617	-	protein_coding	HPG27_RS08335	transcriptional regulator	-	Unknown function
HPG27_RS08340	NC_011333.1	1649509	1649607	-	protein_coding	HPG27_RS08340	flagellar biosynthesis protein FlgG	-	Unknown function
HPG27_RS08345	NC_011334.1	6178	8160	-	protein_coding	HPG27_RS08345	molybdopterin-guanine dinucleotide biosynthesis protein MobA	-	Unknown function
HPG27_RS00365	NC_011333.1	74384	75147	-	protein_coding*	ureF	urease accessory protein UreF	-	Unknown function
HPG27_RS00760	NC_011333.1	156617	157197	+	protein_coding*	HPG27_RS00760	hypothetical protein	-	Unknown function
HPG27_RS01025	NC_011333.1	204020	204321	+	protein_coding*	HPG27_RS01025	hypothetical protein	-	Unknown function
HPG27_RS01365	NC_011333.1	276977	277509	+	protein_coding*	HPG27_RS01365	hypothetical protein	-	Unknown function
HPG27_RS01370	NC_011333.1	277506	278044	+	protein_coding*	HPG27_RS01370	hypothetical protein	-	Unknown function
HPG27_RS01610	NC_011333.1	334046	334286	-	protein_coding*	tatA	protein translocase TatA	COG1826	Intracellular trafficking, secretion, and vesicular transport
HPG27_RS01965	NC_011333.1	400621	401342	+	protein_coding*	HPG27_RS01965	hypothetical protein	-	Unknown function
HPG27_RS02125	NC_011333.1	431733	432103	-	protein_coding*	hspR	MerR family transcriptional regulator	COG0789	Transcription
HPG27_RS02135	NC_011333.1	433147	434396	+	protein_coding*	HPG27_RS02135	hypothetical protein	-	Unknown function
HPG27_RS02165	NC_011333.1	440872	441473	-	protein_coding*	HPG27_RS02165	CDP-diacylglycerol--glycerol-3-phosphate 3-phosphatidyltransferase	COG0558	Lipid transport and metabolism
HPG27_RS02680	NC_011333.1	555256	556142	+	protein_coding*	rsmI	16S rRNA (cytidine(1402)-2'-O)-methyltransferase	COG0313	Translation, ribosomal structure and biogenesis
HPG27_RS02825	NC_011333.1	581068	582033	-	protein_coding*	tonB	siderophore-mediated iron transporter	COG0810	Cell wall/membrane/envelope biogenesis
HPG27_RS03420	NC_011333.1	724525	727331	-	protein_coding*	uvrA	excinuclease ABC subunit A	COG0178	Replication, recombination and repair
HPG27_RS03475	NC_011333.1	737676	739398	-	protein_coding*	dnaX	DNA polymerase III subunit gamma/tau	COG2812	Replication, recombination and repair
HPG27_RS05755	NC_011333.1	1206259	1209943	+	protein_coding*	HPG27_RS05755	hypothetical protein	-	Unknown function
HPG27_RS05965	NC_011333.1	1256512	1265183	-	protein_coding*	rpoB	DNA-directed RNA polymerase subunit beta/beta'	COG0085	Transcription
HPG27_RS06215	NC_011333.1	1302199	1304741	-	protein_coding*	alaS	alanine--tRNA ligase	COG0013	Translation, ribosomal structure and biogenesis
HPG27_RS06225	NC_011333.1	1305765	1307847	-	protein_coding*	HPG27_RS06225	hypothetical protein	-	Unknown function
HPG27_RS06275	NC_011333.1	1315324	1317106	-	protein_coding*	oppA	ABC transporter substrate-binding protein	COG4166	Amino acid transport and metabolism
HPG27_RS06375	NC_011333.1	1333040	1334581	+	protein_coding*	nuoM	NADH-quinone oxidoreductase subunit M	COG1008	Energy production and conversion
HPG27_RS06505	NC_011333.1	1359823	1360856	-	protein_coding*	rpoA	DNA-directed RNA polymerase subunit alpha	COG0202	Transcription
HPG27_RS06835	NC_011333.1	1410890	1411775	-	protein_coding*	ubiA	4-hydroxybenzoate polyprenyltransferase	COG0382	Coenzyme transport and metabolism
HPG27_RS07175	NC_011333.1	1480569	1481053	+	protein_coding*	rnpA	ribonuclease P protein component	COG0594	Translation, ribosomal structure and biogenesis
HPG27_RS07460	NC_011333.1	1540681	1543031	-	protein_coding*	zntA	heavy metal translocating P-type ATPase	COG2217	Inorganic ion transport and metabolism
HPG27_RS07565	NC_011333.1	1568712	1569346	+	protein_coding*	HPG27_RS07565	hypothetical protein	-	Unknown function
HPG27_RS00280	NC_011333.1	52279	53503	-	pseudogene	HPG27_RS00280	restriction endonuclease	NA	Unknown function
HPG27_RS00285	NC_011333.1	53652	54910	-	pseudogene	HPG27_RS00285	restriction endonuclease	NA	Unknown function
HPG27_RS00290	NC_011333.1	54907	57377	-	pseudogene	HPG27_RS00290	DNA (cytosine-5-)-methyltransferase	NA	Unknown function
HPG27_RS00320	NC_011333.1	65056	67489	+	pseudogene	HPG27_RS00320	hypothetical protein	NA	Unknown function
HPG27_RS00335	NC_011333.1	68335	69736	+	pseudogene	HPG27_RS00335	5-amino-6-(5-phosphoribosylamino)uracil reductase	NA	Unknown function
HPG27_RS00350	NC_011333.1	70410	72886	+	pseudogene	HPG27_RS00350	ATP-binding protein	NA	Unknown function
HPG27_RS00430	NC_011333.1	86036	88056	-	pseudogene	HPG27_RS00430	chemotaxis protein	NA	Unknown function
HPG27_RS00480	NC_011333.1	96629	97462	+	pseudogene	HPG27_RS00480	restriction endonuclease	NA	Unknown function
HPG27_RS01050	NC_011333.1	210588	210753	-	pseudogene	HPG27_RS01050	lipopolysaccharide biosynthesis protein	NA	Unknown function
HPG27_RS01565	NC_011333.1	323977	325094	-	pseudogene	HPG27_RS01565	site-specific DNA-methyltransferase	NA	Unknown function
HPG27_RS01715	NC_011333.1	348460	348554	+	pseudogene	HPG27_RS01715	hypothetical protein	NA	Unknown function
HPG27_RS02215	NC_011333.1	451574	454739	-	pseudogene	HPG27_RS02215	restriction endonuclease subunit R	NA	Unknown function
HPG27_RS02305	NC_011333.1	474139	474650	+	pseudogene	HPG27_RS02305	type II restriction endonuclease	NA	Unknown function
HPG27_RS02315	NC_011333.1	475900	476652	+	pseudogene	HPG27_RS02315	restriction endonuclease	NA	Unknown function
HPG27_RS02405	NC_011333.1	493476	494542	+	pseudogene	HPG27_RS02405	phospholipase	NA	Unknown function
HPG27_RS02535	NC_011333.1	520781	526491	-	pseudogene	HPG27_RS02535	cag pathogenicity island protein	NA	Unknown function
HPG27_RS02575	NC_011333.1	534035	535317	+	pseudogene	HPG27_RS02575	transposase	NA	Unknown function
HPG27_RS02920	NC_011333.1	603408	605190	-	pseudogene	HPG27_RS02920	multidrug resistance protein	NA	Unknown function
HPG27_RS03130	NC_011333.1	657225	657876	+	pseudogene	HPG27_RS03130	NAD(P)H-dependent oxidoreductase	NA	Unknown function
HPG27_RS03365	NC_011333.1	712317	714429	+	pseudogene	HPG27_RS03365	acetone carboxylase subunit beta	NA	Unknown function
HPG27_RS03415	NC_011333.1	723733	724196	+	pseudogene	HPG27_RS03415	hypothetical protein	NA	Unknown function
HPG27_RS03445	NC_011333.1	731182	733168	+	pseudogene	HPG27_RS03445	hypothetical protein	NA	Unknown function
HPG27_RS03660	NC_011333.1	775580	777605	+	pseudogene	fliD	flagellar filament capping protein FliD	NA	Unknown function
HPG27_RS03725	NC_011333.1	786509	787835	-	pseudogene	HPG27_RS03725	sortase	NA	Unknown function
HPG27_RS03940	NC_011333.1	830065	832429	-	pseudogene	fecA2,fecA,fecA_2	ligand-gated channel	NA	Unknown function
HPG27_RS04355	NC_011333.1	913700	913971	-	pseudogene	HPG27_RS04355	addiction module toxin RelE	NA	Unknown function
HPG27_RS04425	NC_011333.1	921282	921798	-	pseudogene	HPG27_RS04425	acetokinase	NA	Unknown function
HPG27_RS04445	NC_011333.1	926767	927383	+	pseudogene	hpy8l	restriction endonuclease	NA	Unknown function
HPG27_RS04745	NC_011333.1	992407	993736	-	pseudogene	HPG27_RS04745	ATP/GTP-binding protein	NA	Unknown function
HPG27_RS04750	NC_011333.1	993733	995417	-	pseudogene	HPG27_RS04750	GTPase	NA	Unknown function
HPG27_RS04830	NC_011333.1	1014559	1015193	+	pseudogene	HPG27_RS04830	hypothetical protein	NA	Unknown function
HPG27_RS04855	NC_011333.1	1017762	1018438	-	pseudogene	tieA	hypothetical protein	NA	Unknown function
HPG27_RS04890	NC_011333.1	1022383	1023068	-	pseudogene	ptc1	protein phosphatase	NA	Unknown function
HPG27_RS04915	NC_011333.1	1028150	1028367	-	pseudogene	HPG27_RS04915	hypothetical protein	NA	Unknown function
HPG27_RS04990	NC_011333.1	1046540	1048442	+	pseudogene	HPG27_RS04990	hypothetical protein	NA	Unknown function
HPG27_RS05005	NC_011333.1	1049008	1051507	+	pseudogene	HPG27_RS05005	DNA transfer protein	NA	Unknown function
HPG27_RS05040	NC_011333.1	1057939	1058237	+	pseudogene	HPG27_RS05040	hypothetical protein	NA	Unknown function
HPG27_RS05530	NC_011333.1	1163376	1165093	-	pseudogene	HPG27_RS05530	hypothetical protein	NA	Unknown function
HPG27_RS05675	NC_011333.1	1187967	1190442	-	pseudogene	HPG27_RS05675	AAA family ATPase	NA	Unknown function
HPG27_RS05805	NC_011333.1	1217680	1219094	+	pseudogene	HPG27_RS05805	hypothetical protein	NA	Unknown function
HPG27_RS05970	NC_011333.1	1265177	1265366	+	pseudogene	HPG27_RS05970	hypothetical protein	NA	Unknown function
HPG27_RS06450	NC_011333.1	1350511	1351360	-	pseudogene	HPG27_RS06450	restriction endonuclease	NA	Unknown function
HPG27_RS06865	NC_011333.1	1417870	1420331	+	pseudogene	HPG27_RS06865	site-specific DNA-methyltransferase	NA	Unknown function
HPG27_RS06920	NC_011333.1	1432786	1433011	+	pseudogene	HPG27_RS06920	hypothetical protein	NA	Unknown function
HPG27_RS06970	NC_011333.1	1444660	1444877	-	pseudogene	HPG27_RS06970	hypothetical protein	NA	Unknown function
HPG27_RS07445	NC_011333.1	1537233	1538839	+	pseudogene	HPG27_RS07445	restriction endonuclease	NA	Unknown function
HPG27_RS07540	NC_011333.1	1561457	1564371	-	pseudogene	HPG27_RS07540	DEAD/DEAH box helicase	NA	Unknown function
HPG27_RS07550	NC_011333.1	1564374	1566351	-	pseudogene	HPG27_RS07550	restriction endonuclease	NA	Unknown function
HPG27_RS07610	NC_011333.1	1577049	1577609	-	pseudogene	HPG27_RS07610	restriction endonuclease subunit S	NA	Unknown function
HPG27_RS07705	NC_011333.1	1600610	1601297	+	pseudogene	HPG27_RS07705	type II restriction endonuclease	NA	Unknown function
HPG27_RS07970	NC_011333.1	1652122	1652858	-	pseudogene	HPG27_RS07970	hypothetical protein	NA	Unknown function
HPG27_RS08070	NC_011333.1	9489	9703	-	pseudogene	HPG27_RS08070	hypothetical protein	NA	Unknown function
HPG27_RS08080	NC_011333.1	22985	23173	-	pseudogene	HPG27_RS08080	hypothetical protein	NA	Unknown function
HPG27_RS08085	NC_011333.1	45950	46033	-	pseudogene	HPG27_RS08085	hypothetical protein	NA	Unknown function
HPG27_RS08090	NC_011333.1	63145	63283	+	pseudogene	HPG27_RS08090	M-protein	NA	Unknown function
HPG27_RS08095	NC_011333.1	63322	63537	-	pseudogene	HPG27_RS08095	hypothetical protein	NA	Unknown function
HPG27_RS08100	NC_011333.1	82750	82934	-	pseudogene	HPG27_RS08100	hypothetical protein	NA	Unknown function
HPG27_RS08105	NC_011333.1	136189	136378	-	pseudogene	HPG27_RS08105	hypothetical protein	NA	Unknown function
HPG27_RS08115	NC_011333.1	177501	177658	-	pseudogene	HPG27_RS08115	hypothetical protein	NA	Unknown function
HPG27_RS08130	NC_011333.1	347822	348194	+	pseudogene	HPG27_RS08130	lysozyme	NA	Unknown function
HPG27_RS08150	NC_011333.1	398649	400472	-	pseudogene	HPG27_RS08150	hypothetical protein	NA	Unknown function
HPG27_RS08170	NC_011333.1	476678	476767	+	pseudogene	HPG27_RS08170	hypothetical protein	NA	Unknown function
HPG27_RS08180	NC_011333.1	551975	552079	-	pseudogene	HPG27_RS08180	transposase	NA	Unknown function
HPG27_RS08185	NC_011333.1	684360	689124	+	pseudogene	HPG27_RS08185	restriction endonuclease	NA	Unknown function
HPG27_RS08195	NC_011333.1	756485	758335	-	pseudogene	HPG27_RS08195	hypothetical protein	NA	Unknown function
HPG27_RS08205	NC_011333.1	789571	789712	-	pseudogene	HPG27_RS08205	zinc ABC transporter substrate-binding protein	NA	Unknown function
HPG27_RS08210	NC_011333.1	804064	804249	+	pseudogene	HPG27_RS08210	hypothetical protein	NA	Unknown function
HPG27_RS08225	NC_011333.1	878649	878836	-	pseudogene	HPG27_RS08225	hypothetical protein	NA	Unknown function
HPG27_RS08230	NC_011333.1	892031	892195	-	pseudogene	HPG27_RS08230	sugar fermentation stimulation protein	NA	Unknown function
HPG27_RS08235	NC_011333.1	898909	899081	+	pseudogene	HPG27_RS08235	hypothetical protein	NA	Unknown function
HPG27_RS08240	NC_011333.1	921810	922149	-	pseudogene	HPG27_RS08240	hypothetical protein	NA	Unknown function
HPG27_RS08275	NC_011333.1	1085066	1085194	-	pseudogene	HPG27_RS08275	molecular chaperone DnaK	NA	Unknown function
HPG27_RS08285	NC_011333.1	1165277	1166267	-	pseudogene	HPG27_RS08285	hypothetical protein	NA	Unknown function
HPG27_RS08290	NC_011333.1	1192453	1192682	-	pseudogene	HPG27_RS08290	hypothetical protein	NA	Unknown function
HPG27_RS08295	NC_011333.1	1219094	1219296	+	pseudogene	HPG27_RS08295	hypothetical protein	NA	Unknown function
HPG27_RS08300	NC_011333.1	1230795	1231007	-	pseudogene	HPG27_RS08300	hypothetical protein	NA	Unknown function
HPG27_RS08310	NC_011333.1	1351332	1351917	-	pseudogene	HPG27_RS08310	hypothetical protein	NA	Unknown function
HPG27_RS08315	NC_011333.1	1427818	1427984	+	pseudogene	HPG27_RS08315	flavoprotein oxidoreductase	NA	Unknown function
HPG27_RS08325	NC_011333.1	1466908	1469260	-	pseudogene	HPG27_RS08325	hypothetical protein	NA	Unknown function
HPG27_RS08330	NC_011333.1	1586457	1586643	-	pseudogene	HPG27_RS08330	hypothetical protein	NA	Unknown function
HPG27_RS00830	NC_011333.1	168375	169708	-	pseudogene(possibile errire di seq >50bp)	arsS	two-component sensor histidine kinase	NA	Unknown function
HPG27_RS08065	NC_011333.1	597887	598202	+	RNase_P_RNA	HPG27_RS08065	RNase P RNA component class A	NA	Unknown function
HPG27_RS04905	NC_011333.1	1024543	1024660	-	rRNA	5SrRNA	5S ribosomal RNA	NA	NA
HPG27_RS04910	NC_011333.1	1024896	1027783	-	rRNA	23SrRNA	23S ribosomal RNA	NA	NA
HPG27_RS05690	NC_011333.1	1192745	1194254	-	rRNA	16SrRNA	16S ribosomal RNA	NA	NA
HPG27_RS06960	NC_011333.1	1441053	1441170	-	rRNA	5SrRNA	5S ribosomal RNA	NA	NA
HPG27_RS06965	NC_011333.1	1441406	1444293	-	rRNA	23SrRNA	23S ribosomal RNA	NA	NA
HPG27_RS07130	NC_011333.1	1474633	1476142	-	rRNA	16SrRNA	16S ribosomal RNA	NA	NA
HPG27_RS08075	NC_011333.1	16416	16513	-	SRP_RNA	HPG27_RS08075	signal recognition particle sRNA small type	NA	Unknown function
HPG27_RS08215	NC_011333.1	807612	807997	-	tmRNA	HPG27_RS08215	transfer-messenger RNA	NA	Unknown function
HPG27_RS00035	NC_011333.1	4031	4106	-	tRNA	tRNA-Glu	tRNA-Glu	NA	NA
HPG27_RS00040	NC_011333.1	4179	4255	-	tRNA	tRNA-Asp	tRNA-Asp	NA	NA
HPG27_RS00045	NC_011333.1	4306	4381	-	tRNA	tRNA-Val	tRNA-Val	NA	NA
HPG27_RS00050	NC_011333.1	4423	4497	-	tRNA	tRNA-Glu	tRNA-Glu	NA	NA
HPG27_RS00055	NC_011333.1	4508	4583	-	tRNA	tRNA-Lys	tRNA-Lys	NA	NA
HPG27_RS00390	NC_011333.1	79154	79229	-	tRNA	tRNA-Val	tRNA-Val	NA	NA
HPG27_RS00475	NC_011333.1	96332	96423	+	tRNA	tRNA-Ser	tRNA-Ser	NA	NA
HPG27_RS01145	NC_011333.1	233613	233687	-	tRNA	tRNA-Asn	tRNA-Asn	NA	NA
HPG27_RS01265	NC_011333.1	256662	256737	-	tRNA	tRNA-Ala	tRNA-Ala	NA	NA
HPG27_RS01665	NC_011333.1	342540	342616	+	tRNA	tRNA-Arg	tRNA-Arg	NA	NA
HPG27_RS01920	NC_011333.1	395037	395124	-	tRNA	tRNA-Ser	tRNA-Ser	NA	NA
HPG27_RS02200	NC_011333.1	448273	448350	-	tRNA	tRNA-Pro	tRNA-Pro	NA	NA
HPG27_RS03615	NC_011333.1	766827	766903	-	tRNA	tRNA-Met	tRNA-Met	NA	NA
HPG27_RS04105	NC_011333.1	858914	858990	+	tRNA	tRNA-Arg	tRNA-Arg	NA	NA
HPG27_RS04385	NC_011333.1	917847	917923	-	tRNA	tRNA-Met	tRNA-Met	NA	NA
HPG27_RS04390	NC_011333.1	917945	918019	-	tRNA	tRNA-Gln	tRNA-Gln	NA	NA
HPG27_RS04615	NC_011333.1	971580	971654	+	tRNA	tRNA-Gly	tRNA-Gly	NA	NA
HPG27_RS04620	NC_011333.1	971696	971782	+	tRNA	tRNA-Leu	tRNA-Leu	NA	NA
HPG27_RS04625	NC_011333.1	971856	971930	+	tRNA	tRNA-Cys	tRNA-Cys	NA	NA
HPG27_RS04630	NC_011333.1	971980	972067	+	tRNA	tRNA-Ser	tRNA-Ser	NA	NA
HPG27_RS05140	NC_011333.1	1085316	1085392	-	tRNA	tRNA-Arg	tRNA-Arg	NA	NA
HPG27_RS05145	NC_011333.1	1085411	1085487	-	tRNA	tRNA-Arg	tRNA-Arg	NA	NA
HPG27_RS05150	NC_011333.1	1085547	1085623	-	tRNA	tRNA-His	tRNA-His	NA	NA
HPG27_RS05155	NC_011333.1	1085691	1085768	-	tRNA	tRNA-Pro	tRNA-Pro	NA	NA
HPG27_RS05385	NC_011333.1	1135637	1135721	-	tRNA	tRNA-Leu	tRNA-Leu	NA	NA
HPG27_RS05415	NC_011333.1	1140506	1140582	+	tRNA	tRNA-Ile	tRNA-Ile	NA	NA
HPG27_RS05420	NC_011333.1	1140598	1140673	+	tRNA	tRNA-Ala	tRNA-Ala	NA	NA
HPG27_RS05870	NC_011333.1	1234392	1234469	-	tRNA	tRNA-Met	tRNA-Met	NA	NA
HPG27_RS06005	NC_011333.1	1268497	1268572	-	tRNA	tRNA-Trp	tRNA-Trp	NA	NA
HPG27_RS06020	NC_011333.1	1270130	1270204	-	tRNA	tRNA-Thr	tRNA-Thr	NA	NA
HPG27_RS06025	NC_011333.1	1270235	1270311	-	tRNA	tRNA-Gly	tRNA-Gly	NA	NA
HPG27_RS06030	NC_011333.1	1270327	1270411	-	tRNA	tRNA-Tyr	tRNA-Tyr	NA	NA
HPG27_RS06035	NC_011333.1	1270439	1270514	-	tRNA	tRNA-Thr	tRNA-Thr	NA	NA
HPG27_RS06065	NC_011333.1	1275869	1275955	-	tRNA	tRNA-Leu	tRNA-Leu	NA	NA
HPG27_RS06070	NC_011333.1	1276009	1276095	-	tRNA	tRNA-Leu	tRNA-Leu	NA	NA
HPG27_RS07575	NC_011333.1	1570197	1570272	+	tRNA	tRNA-Phe	tRNA-Phe	NA	NA
genes added to the official annotation
protein coding genes misclassified due to sequencing errors in the official annotation
