# Supplementary material for: The Helicobacter pylori Heat-Shock Repressor HspR: Definition of Its Direct Regulon and Characterization of the Cooperative DNA-Binding Mechanism on Its Own Promoter
Source: Front Microbiol. 2018 Aug 14;9:1887. doi: 10.3389/fmicb.2018.01887 (PMC6102357; doi:10.3389/fmicb.2018.01887)
Supplement: TABLE S3 — Transcriptome of the wild type and ΔhspR strains. [file Table_3.XLSX]

## Sheet: A
List of the genes differentially expressed in Heat-Shock vs WT comparison
GeneNames	log2FC	padj	Class	Common names	description	Cog_CDD	Cog_class
Up-regulated genes
HPG27_RS00580	3.62903	3.16929e-260	protein_coding	hrcA	HrcA family transcriptional regulator	-	-
HPG27_RS00570	3.53052	7.97517e-202	protein_coding	dnaK	molecular chaperone DnaK	COG0443	Posttranslational modification, protein turnover, chaperones
HPG27_RS00575	3.52696	2.99962e-228	protein_coding	grpE	nucleotide exchange factor GrpE	COG0576	Posttranslational modification, protein turnover, chaperones
HPG27_RS02125	3.47929	3.07688e-120	protein_coding*	hspR	MerR family transcriptional regulator	COG0789	Transcription
HPG27_RS02130	3.42747	7.91219e-203	protein_coding	dnaJ1,CbpA	DnaJ family protein	COG0484	Posttranslational modification, protein turnover, chaperones
HPG27_RS06650	3.08049	4.56952e-66	protein_coding	HPG27_RS06650	hypothetical protein	-	-
HPG27_RS00305	3.05195	1.65573e-17	protein_coding	HPG27_RS00305	hypothetical protein	-	-
HPG27_RS08015	2.81372	3.9349e-49	protein_coding	HPG27_RS08015	plasmid mobilization relaxosome protein MobC	-	-
HPG27_RS07980	2.78643	8.04484e-140	protein_coding	HPG27_RS07980	replication initiation protein	-	-
HPG27_RS00075	2.77591	2.66376e-175	protein_coding	groES,hspA,hsp10,mopB	co-chaperone GroES	COG0234	Posttranslational modification, protein turnover, chaperones
HPG27_RS00070	2.75131	3.64185e-164	protein_coding	groEL,hspB,hsp60,mopA	molecular chaperone GroEL	COG0459	Posttranslational modification, protein turnover, chaperones
HPG27_RS03185	2.65433	2.03618e-138	protein_coding	pfr	non-heme ferritin	COG1528	Inorganic ion transport and metabolism
HPG27_RS01220	2.57673	8.40128e-147	protein_coding	napA	DNA starvation/stationary phase protection protein	COG0783	Inorganic ion transport and metabolism;Defense mechanisms
HPG27_RS07135	2.36846	2.18179e-49	protein_coding	HPG27_RS07135	hypothetical protein	-	-
HPG27_RS07985	2.26981	1.73719e-71	protein_coding	HPG27_RS07985	hypothetical protein	COG3177	Transcription
HPG27_RS03120	2.16559	2.63243e-68	protein_coding	HPG27_RS03120	hypothetical protein	-	-
HPG27_RS03125	2.09659	4.17905e-94	protein_coding	HPG27_RS03125	3-hydroxy acid dehydrogenase	COG2084	Lipid transport and metabolism
HPG27_RS07990	2.07597	3.90046e-20	protein_coding	HPG27_RS07990	cAMP-induced filamentation protein	COG3177	Transcription
HPG27_RS08345	2.07447	1.92154e-59	protein_coding	HPG27_RS08345	molybdopterin-guanine dinucleotide biosynthesis protein MobA	-	-
HPG27_RS03180	1.94759	1.94975e-57	protein_coding	serB	phosphoserine phosphatase SerB	COG0560	Amino acid transport and metabolism
HPG27_RS01125	1.91447	7.26134e-76	protein_coding	msrA,msrB	peptide-methionine (R)-S-oxide reductase	COG0229	Posttranslational modification, protein turnover, chaperones
HPG27_RS07245	1.81874	1.20015e-45	protein_coding	HPG27_RS07245	cytochrome c biogenesis protein CcsA	COG1858	Posttranslational modification, protein turnover, chaperones
HPG27_RS03465	1.80127	7.05865e-49	protein_coding	HPG27_RS03465	ABC transporter ATP-binding protein	COG1137	Cell wall/membrane/envelope biogenesis
HPG27_RS06750	1.73758	4.60616e-14	protein_coding	HPG27_RS06750	hypothetical protein	-	-
HPG27_RS00140	1.73502	4.78247e-31	protein_coding	hopD,omp2	membrane protein	-	-
HPG27_RS07790	1.71295	7.43472e-53	protein_coding	rps2,rpsB	30S ribosomal protein S2	COG0052	Translation, ribosomal structure and biogenesis
HPG27_RS04590	1.70608	2.46123e-27	protein_coding	yckK	amino acid ABC transporter substrate-binding protein	COG0834	Signal transduction mechanisms;Amino acid transport and metabolism
cncr1	1.70599	1.02662e-31	ncRNA	cncR1	HsrA regulated ncRNA	NA	NA
HPG27_RS02255	1.69847	2.02162e-54	protein_coding	horE,omp11	membrane protein	-	-
HPG27_RS02740	1.67606	6.58636e-37	protein_coding	ykgB	membrane protein	COG3059	Unknown
HPG27_RS02925	1.59819	5.536e-57	protein_coding	flaA	flagellin A	COG1344	Cell motility
HPG27_RS07795	1.59211	2.73482e-54	protein_coding	tfs,tsf	elongation factor Ts	COG0264	Translation, ribosomal structure and biogenesis
HPG27_RS03655	1.5618	1.51575e-26	protein_coding	flaG	flagellar protein FlaG	COG1334	Not_defined
HPG27_RS03495	1.49987	1.48302e-49	protein_coding	hopO,omp16	hypothetical protein	-	-
HPG27_RS00565	1.49807	4.65475e-21	protein_coding	HPG27_RS00565	hypothetical protein	-	-
HPG27_RS07230	1.48077	2.26716e-37	protein_coding	trx2	thiol reductase thioredoxin	-	-
HPG27_RS04815	1.44894	2.15634e-09	protein_coding	HPG27_RS04815	hypothetical protein	-	-
HPG27_RS02120	1.37475	0.00721187	protein_coding	rarA	recombinase RarA	COG2256	Replication, recombination and repair
HPG27_RS03660	1.36206	4.59403e-35	pseudogene	fliD	flagellar filament capping protein FliD	NA	NA
HPG27_RS06480	1.35906	6.14273e-34	protein_coding	HPG27_RS06480	polyisoprenoid-binding protein	COG2353	Not_defined
HPG27_RS02655	1.3338	1.67838e-26	protein_coding	cagA,cag26	exotoxin CagA	-	-
HPG27_RS05345	1.31905	2.51479e-24	protein_coding	homC	hypothetical protein	-	-
HPG27_RS02500	1.26899	6.65661e-24	protein_coding	cag1	cag pathogenicity island protein Cag1	-	-
HPG27_RS00350	1.26843	2.17334e-08	pseudogene	HPG27_RS00350	ATP-binding protein	NA	NA
HPG27_RS03505	1.2649	1.52349e-25	protein_coding	ansB	L-asparaginase	COG0252	Intracellular trafficking, secretion, and vesicular transport;Translation, ribosomal structure and biogenesis
HPG27_RS02575	1.26349	1.53252e-30	pseudogene	HPG27_RS02575	transposase	NA	NA
HPG27_RS01575	1.25203	3.73557e-18	protein_coding	HPG27_RS01575	ATP-binding protein	COG0523	Not_defined
HPG27_RS03550	1.24894	1.93419e-29	protein_coding	tnpB	transposase	COG0675	Mobilome: prophages, transposons
HPG27_RS03075	1.24649	2.14799e-32	protein_coding	hydB	hydrogenase 2 large subunit	COG0374	Energy production and conversion
HPG27_RS07455	1.23439	1.27226e-15	protein_coding	HPG27_RS07455	hypothetical protein	COG3399	Unknown
HPG27_RS00240	1.19697	1.13205e-24	protein_coding	tnpB	transposase	COG0675	Mobilome: prophages, transposons
HPG27_RS04645	1.19472	1.2939e-26	protein_coding	tnpB	transposase	COG0675	Mobilome: prophages, transposons
HPG27_RS03930	1.17035	6.22793e-15	protein_coding	lex2B	lipooligosaccharide 5G8 epitope biosynthesis-associated protein (lex2B)	COG3306	Cell wall/membrane/envelope biogenesis
HPG27_RS04170	1.16716	6.17849e-07	protein_coding	HPG27_RS04170	phosphatase PAP2 family protein	COG0671	Lipid transport and metabolism
HPG27_RS05575	1.1665	1.47335e-23	protein_coding	flgM	hypothetical protein	-	-
HPG27_RS04495	1.16563	2.34269e-26	protein_coding	HPG27_RS04495	membrane protein	COG0670	Not_defined
HPG27_RS03330	1.16163	1.42594e-20	protein_coding	feoB	ferrous iron transporter B	COG0370	Inorganic ion transport and metabolism
HPG27_RS03065	1.15694	3.56919e-25	protein_coding	mdaB,mda66	NADPH quinone reductase MdaB	COG2249	Not_defined
HPG27_RS01315	1.14969	6.12501e-09	protein_coding	HPG27_RS01315	endonuclease	-	-
HPG27_RS04735	1.14266	1.10033e-27	protein_coding	tnpB	transposase	COG0675	Mobilome: prophages, transposons
HPG27_RS03070	1.13616	1.03638e-24	protein_coding	hydA,hyaA	quinone-reactive Ni/Fe-hydrogenase small chain	COG1740	Energy production and conversion
HPG27_RS08160	1.11	2.31332e-05	protein_coding	HPG27_RS08160	hypothetical protein	-	-
HPG27_RS07635	1.10927	6.35065e-16	protein_coding	rocF	arginase	COG0010	Amino acid transport and metabolism
HPG27_RS03130	1.09899	9.74212e-22	pseudogene	HPG27_RS03130	NAD(P)H-dependent oxidoreductase	NA	NA
HPG27_RS08025	1.09851	1.49213e-13	protein_coding	HPG27_RS08025	YafQ family addiction module toxin	-	-
HPG27_RS03460	1.08902	1.86918e-11	protein_coding	rpoN	RNA polymerase sigma-54 factor	COG1508	Transcription
HPG27_RS01150	1.0776	1.26431e-22	protein_coding	hopA,omp6	membrane protein	-	-
HPG27_RS02345	1.07424	0.00500109	protein_coding	HPG27_RS02345	hypothetical protein	-	-
HPG27_RS07200	1.07214	1.14144e-16	protein_coding	homD	membrane protein	-	-
HPG27_RS03800	1.0695	2.23206e-25	protein_coding	acnB	bifunctional aconitate hydratase 2/2-methylisocitrate dehydratase	COG1049	Energy production and conversion
HPG27_RS04420	1.06526	5.76802e-13	protein_coding	HPG27_RS04420	cupin	COG1917	Not_defined
HPG27_RS01325	1.05011	4.82028e-21	protein_coding	clpB	chaperone protein ClpB	COG0542	Posttranslational modification, protein turnover, chaperones
HPG27_RS08020	1.04954	3.95748e-12	protein_coding	HPG27_RS08020	hypothetical protein	-	-
HPG27_RS02155	1.04855	4.3469e-23	protein_coding	htrA	serine endoprotease DegQ	COG0265	Posttranslational modification, protein turnover, chaperones
HPG27_RS05810	1.04442	1.61623e-17	protein_coding	cstA	carbon starvation protein A	COG1966	Signal transduction mechanisms
HPG27_RS07670	1.04154	3.77836e-10	protein_coding	HPG27_RS07670	hypothetical protein	-	-
HPG27_RS06975	1.03717	8.25504e-07	protein_coding	HPG27_RS06975	hypothetical protein	-	-
HPG27_RS05260	1.03497	2.76239e-14	protein_coding	tpx,tagD	2-Cys peroxiredoxin	COG2077	Posttranslational modification, protein turnover, chaperones
HPG27_RS00380	1.02805	2.48449e-22	protein_coding	ureB	urease subunit beta	COG0804	Amino acid transport and metabolism
HPG27_RS05325	1.0249	5.38269e-20	protein_coding	dsbC	thiol:disulfide interchange protein	COG2143	Posttranslational modification, protein turnover, chaperones
HPG27_RS04585	1.0196	0.00909079	protein_coding	yckJ	cysteine ABC transporter permease	COG0765	Amino acid transport and metabolism
HPG27_RS00680	1.01739	1.16895e-14	protein_coding	aroF,dhs1	3-deoxy-7-phosphoheptulonate synthase class II	COG3200	Amino acid transport and metabolism
HPG27_RS04685	1.00151	2.15713e-19	protein_coding	rdxA	NAD(P)H-dependent oxidoreductase	COG0778	Energy production and conversion
Down-regulated genes
HPG27_RS06095	-1.00144	5.03883e-06	protein_coding	HPG27_RS06095	RDD family protein	COG1714	Unknown
HPG27_RS03885	-1.00152	3.28701e-12	protein_coding	horG,omp18	membrane protein	-	-
HPG27_RS05040	-1.00784	0.00832235	pseudogene	HPG27_RS05040	hypothetical protein	NA	NA
HPG27_RS00535	-1.01132	1.16895e-14	protein_coding	HPG27_RS00535	glycosyl transferase	COG0463	Cell wall/membrane/envelope biogenesis
HPG27_RS06655	-1.01229	3.72052e-12	protein_coding	rnhB	ribonuclease HII	COG0164	Replication, recombination and repair
HPG27_RS04285	-1.04678	1.61958e-18	protein_coding	frpB1,frpB	membrane protein	COG1629	Inorganic ion transport and metabolism
HPG27_RS03230	-1.04922	2.71929e-05	protein_coding	rnc	ribonuclease III	COG0571	Transcription
HPG27_RS00760	-1.05074	2.31983e-08	protein_coding*	HPG27_RS00760	hypothetical protein	-	-
HPG27_RS02170	-1.05644	6.51243e-06	protein_coding	HPG27_RS02170	hypothetical protein	-	-
HPG27_RS03390	-1.07027	2.14263e-10	protein_coding	dgkA	diacylglycerol kinase	COG0818	Lipid transport and metabolism
HPG27_RS06395	-1.08335	0.0058602	protein_coding	HPG27_RS06395	hypothetical protein	-	-
HPG27_RS05610	-1.08829	3.69417e-12	protein_coding	exbD1,exbD,exbD_1	biopolymer transporter ExbD	COG0848	Intracellular trafficking, secretion, and vesicular transport
HPG27_RS01785	-1.10177	2.63255e-08	protein_coding	HPG27_RS01785	hypothetical protein	-	-
HPG27_RS04060	-1.11786	6.31746e-13	protein_coding	HPG27_RS04060	RNA-binding protein	COG0724	Translation, ribosomal structure and biogenesis
HPG27_RS05715	-1.12006	2.15051e-11	protein_coding	rimM	16S rRNA-processing protein RimM	COG0806	Translation, ribosomal structure and biogenesis
HPG27_RS07015	-1.12316	4.81427e-05	protein_coding	HPG27_RS07015	hypothetical protein	COG2194	Cell wall/membrane/envelope biogenesis
HPG27_RS07325	-1.12639	3.41e-07	protein_coding	flgA	flagella basal body P-ring formation protein FlgA	COG1261	Cell motility
HPG27_RS05370	-1.12867	4.68244e-11	protein_coding	HPG27_RS05370	hypothetical protein	-	-
HPG27_RS03575	-1.12886	8.90941e-15	protein_coding	gpt	nicotinate phosphoribosyltransferase	COG2236	Coenzyme transport and metabolism
HPG27_RS03385	-1.14325	1.39544e-14	protein_coding	HPG27_RS03385	hypothetical protein	-	-
HPG27_RS03415	-1.18378	2.40938e-06	pseudogene	HPG27_RS03415	hypothetical protein	NA	NA
HPG27_RS07190	-1.18877	3.26366e-15	protein_coding	HPG27_RS07190	SpoIIIJ-associated protein	-	-
HPG27_RS04115	-1.1941	2.69368e-17	protein_coding	HPG27_RS04115	hypothetical protein	-	-
HPG27_RS01560	-1.20026	0.000449803	protein_coding	HPG27_RS01560	hypothetical protein	-	-
HPG27_RS01925	-1.20627	5.23205e-05	protein_coding	HPG27_RS01925	hypothetical protein	-	-
HPG27_RS03160	-1.21914	1.32598e-16	protein_coding	murA,murZ	UDP-N-acetylglucosamine 1-carboxyvinyltransferase	COG0766	Cell wall/membrane/envelope biogenesis
HPG27_RS05580	-1.2193	3.37393e-15	protein_coding	HPG27_RS05580	hypothetical protein	-	-
HPG27_RS07930	-1.22832	1.54046e-21	protein_coding	pdxJ	pyridoxine 5'-phosphate synthase	-	-
HPG27_RS02880	-1.23653	4.91015e-19	protein_coding	res	DEAD/DEAH box helicase	-	-
HPG27_RS07970	-1.28134	6.5741e-13	pseudogene	HPG27_RS07970	hypothetical protein	NA	NA
HPG27_RS01005	-1.28535	2.62488e-18	protein_coding	HPG27_RS01005	hypothetical protein	-	-
HPG27_RS07180	-1.3262	4.56084e-08	protein_coding	HPG27_RS07180	membrane protein insertion efficiency factor YidD	COG0759	Cell wall/membrane/envelope biogenesis
HPG27_RS07195	-1.34734	2.90544e-17	protein_coding	trmE,thdF,tdhF	tRNA modification GTPase TrmE	COG0486	Translation, ribosomal structure and biogenesis
HPG27_RS05095	-1.35177	3.7716e-09	protein_coding	parA	chromosome partitioning protein ParA	COG1192	Cell motility
HPG27_RS02805	-1.37514	6.63559e-10	protein_coding	mdoB	phosphatidylglycerol--membrane-oligosaccharide glycerophosphotransferase	COG1368	Cell wall/membrane/envelope biogenesis
HPG27_RS05770	-1.38799	5e-09	protein_coding	ybeY	endoribonuclease YbeY	COG0319	Translation, ribosomal structure and biogenesis
HPG27_RS03155	-1.39818	1.19441e-16	protein_coding	HPG27_RS03155	hypothetical protein	-	-
HPG27_RS07935	-1.4022	3.06692e-23	protein_coding	pdxA	4-hydroxythreonine-4-phosphate dehydrogenase	COG1995	Coenzyme transport and metabolism
HPG27_RS06160	-1.45701	5.93382e-18	protein_coding	HPG27_RS06160	hypothetical protein	-	-
HPG27_RS07940	-1.49983	1.29394e-15	protein_coding	gcp,tsaD	tRNA (adenosine(37)-N6)-threonylcarbamoyltransferase complex transferase subunit TsaD	COG0533	Translation, ribosomal structure and biogenesis
HPG27_RS03405	-1.51461	2.86031e-20	protein_coding	flgR	ATPase AAA	COG2204	Signal transduction mechanisms
HPG27_RS04635	-1.55069	2.69905e-17	protein_coding	nhaC	sodium:proton antiporter	COG1757	Energy production and conversion
HPG27_RS03410	-1.71433	4.84666e-07	protein_coding	HPG27_RS03410	hypothetical protein	-	-
HPG27_RS03285	-1.72357	6.91245e-08	protein_coding	ogt,dat1	methylated-DNA--protein-cysteine methyltransferase	COG0350	Replication, recombination and repair
HPG27_RS03400	-1.74261	2.78822e-20	protein_coding	HPG27_RS03400	hypothetical protein	-	-
HPG27_RS03170	-1.89723	1.96341e-23	protein_coding	HPG27_RS03170	hypothetical protein	COG1573	Replication, recombination and repair
HPG27_RS00935	-1.97099	1.33776e-06	protein_coding	HPG27_RS00935	hypothetical protein	-	-
HPG27_RS02665	-2.03207	1.08482e-16	protein_coding	murI,glr	glutamate racemase	COG0796	Cell wall/membrane/envelope biogenesis
HPG27_RS00410	-2.1564	1.0106e-56	protein_coding	prfA	peptide chain release factor 1	COG0216	Translation, ribosomal structure and biogenesis
HPG27_RS08060	-2.30765	1.53252e-30	protein_coding	HPG27_RS08060	hypothetical protein	-	-
HPG27_RS07950	-2.63423	2.8911e-48	protein_coding	HPG27_RS07950	ubiquinol-cytochrome C chaperone family protein	COG4735	Unknown

## Sheet: B
List of the genes differentially expressed in DHSPR vs WT comparison
GeneNames	log2FC	padj	Class	Common names	Description	Cog_CDD	Cog_class
Up-regulated genes
HPG27_RS02130	2.86029	5.11034e-141	protein_coding	dnaJ1,CbpA	DnaJ family protein	COG0484	Posttranslational modification, protein turnover, chaperones
HPG27_RS00575	2.65198	1.06585e-128	protein_coding	grpE	nucleotide exchange factor GrpE	COG0576	Posttranslational modification, protein turnover, chaperones
HPG27_RS00580	2.47348	9.74594e-121	protein_coding	hrcA	HrcA family transcriptional regulator	-	-
HPG27_RS00570	2.35592	1.57448e-89	protein_coding	dnaK	molecular chaperone DnaK	COG0443	Posttranslational modification, protein turnover, chaperones
HPG27_RS00565	2.04037	1.6638e-39	protein_coding	HPG27_RS00565	hypothetical protein	-	-
HPG27_RS04590	1.66162	1.47369e-26	protein_coding	yckK	amino acid ABC transporter substrate-binding protein	COG0834	Signal transduction mechanisms;Amino acid transport and metabolism
HPG27_RS06480	1.49536	6.19259e-41	protein_coding	HPG27_RS06480	polyisoprenoid-binding protein	COG2353	Not_defined
HPG27_RS06745	1.49029	6.88066e-26	protein_coding	tonB2,tonB	protein tonB	COG0810	Cell wall/membrane/envelope biogenesis
HPG27_RS04585	1.48937	8.57865e-05	protein_coding	yckJ	cysteine ABC transporter permease	COG0765	Amino acid transport and metabolism
HPG27_RS03435	1.48846	6.94241e-07	protein_coding	HPG27_RS03435	hypothetical protein	-	-
HPG27_RS00070	1.43443	2.71761e-44	protein_coding	groEL,hspB,hsp60,mopA	molecular chaperone GroEL	COG0459	Posttranslational modification, protein turnover, chaperones
HPG27_RS07105	1.40677	0.000411912	protein_coding	HPG27_RS07105	hypothetical protein	-	-
HPG27_RS01105	1.3821	3.18168e-29	protein_coding	nifS,iscS	cysteine desulfurase, NifS family	COG1104	Amino acid transport and metabolism
HPG27_RS00075	1.38034	4.03515e-43	protein_coding	groES,hspA,hsp10,mopB	co-chaperone GroES	COG0234	Posttranslational modification, protein turnover, chaperones
HPG27_RS02985	1.37333	1.64883e-22	protein_coding	HPG27_RS02985	hypothetical protein	-	-
HPG27_RS03940	1.36637	5.44493e-20	pseudogene	fecA2,fecA,fecA_2	ligand-gated channel	NA	NA
HPG27_RS00625	1.29352	5.24049e-14	protein_coding	HPG27_RS00625	hypothetical protein	-	-
HPG27_RS01110	1.2758	5.01135e-29	protein_coding	nifU	iron-sulfur cluster assembly scaffold protein NifU	COG0822	Posttranslational modification, protein turnover, chaperones
HPG27_RS03265	1.26768	8.85898e-30	protein_coding	horF,omp14	membrane protein	-	-
HPG27_RS03430	1.26024	3.48329e-15	protein_coding	mraW	ribosomal RNA small subunit methyltransferase H	COG0275	Translation, ribosomal structure and biogenesis
HPG27_RS02215	1.23892	5.90335e-11	pseudogene	HPG27_RS02215	restriction endonuclease subunit R	NA	NA
HPG27_RS07595	1.23618	2.9157e-05	protein_coding	HPG27_RS07595	hypothetical protein	-	-
HPG27_RS01115	1.21111	2.42236e-14	protein_coding	HPG27_RS01115	CopG family transcriptional regulator	-	-
HPG27_RS03655	1.18118	3.11592e-15	protein_coding	flaG	flagellar protein FlaG	COG1334	Not_defined
HPG27_RS06740	1.16798	4.15498e-15	protein_coding	exbD2,exbD,exbD_2	biopolymer transporter ExbD	COG0848	Intracellular trafficking, secretion, and vesicular transport
HPG27_RS00655	1.16659	3.32285e-06	protein_coding	HPG27_RS00655	hypothetical protein	-	-
HPG27_RS05080	1.16416	1.64422e-15	protein_coding	HPG27_RS05080	hypothetical protein	COG3843	Intracellular trafficking, secretion, and vesicular transport
HPG27_RS08000	1.14856	1.39363e-14	protein_coding	HPG27_RS08000	hypothetical protein	COG0476	Coenzyme transport and metabolism
HPG27_RS03425	1.13443	2.86883e-25	protein_coding	hopE,omp15	membrane protein	-	-
HPG27_RS01470	1.11354	5.71396e-09	protein_coding	pabB	para-aminobenzoate synthase	COG0147	Amino acid transport and metabolism;Coenzyme transport and metabolism
HPG27_RS05830	1.10962	4.98974e-20	protein_coding	glnH	glutamine ABC transporter substrate-binding protein	COG0834	Amino acid transport and metabolism;Signal transduction mechanisms
HPG27_RS01040	1.10353	1.38378e-20	protein_coding	mpr	Na+/H+ antiporter	COG0489	Cell cycle control, cell division, chromosome partitioning
HPG27_RS01120	1.09874	2.42955e-12	protein_coding	radA,sms	DNA repair protein RadA	COG1066	Posttranslational modification, protein turnover, chaperones
HPG27_RS01505	1.07731	1.04911e-11	protein_coding	dppC	peptide ABC transporter	COG1173	Amino acid transport and metabolism;Inorganic ion transport and metabolism
HPG27_RS01875	1.07274	4.14144e-11	protein_coding	csd4	purine-nucleoside phosphorylase	-	-
HPG27_RS00020	1.06223	1.92152e-10	protein_coding	cynT,icfA	carbonic anhydrase	COG0288	Inorganic ion transport and metabolism
HPG27_RS08265	1.06083	0.000296969	protein_coding	HPG27_RS08265	hypothetical protein	-	-
HPG27_RS04185	1.05523	7.22711e-15	protein_coding	guaC	GMP reductase	COG0516	Nucleotide transport and metabolism
HPG27_RS06860	1.04162	2.88559e-06	protein_coding	crdR	DNA-binding response regulator	COG0745	Transcription;Signal transduction mechanisms
HPG27_RS06820	1.0384	9.42234e-09	protein_coding	psd	phosphatidylserine decarboxylase	COG0688	Lipid transport and metabolism
HPG27_RS04855	1.02174	0.00955242	pseudogene	tieA	hypothetical protein	NA	NA
HPG27_RS02345	1.01333	0.00883748	protein_coding	HPG27_RS02345	hypothetical protein	-	-
HPG27_RS06735	1.00903	1.4162e-11	protein_coding	exbB2,exbB,exb_2	TonB-system energizer ExbB	COG0811	Intracellular trafficking, secretion, and vesicular transport
HPG27_RS03585	1.00007	2.7355e-15	protein_coding	pgpA	phosphatidylglycerophosphatase A	COG1267	Lipid transport and metabolism
Down-regulated genes
HPG27_RS07645	-1.01757	8.67406e-17	protein_coding	HPG27_RS07645	hypothetical protein	COG1479	Unknown
HPG27_RS07965	-1.05705	1.1233e-24	protein_coding	HPG27_RS07965	hypothetical protein	COG4735	Unknown
HPG27_RS08060	-1.1053	3.0529e-08	protein_coding	HPG27_RS08060	hypothetical protein	-	-
HPG27_RS03185	-1.11917	1.36239e-24	protein_coding	pfr	non-heme ferritin	COG1528	Inorganic ion transport and metabolism
HPG27_RS04735	-1.20397	3.15733e-30	protein_coding	tnpB	transposase	COG0675	Mobilome: prophages, transposons
HPG27_RS03550	-1.2259	4.48949e-28	protein_coding	tnpB	transposase	COG0675	Mobilome: prophages, transposons
HPG27_RS02575	-1.22659	1.74857e-28	pseudogene	HPG27_RS02575	transposase	NA	NA
HPG27_RS07830	-1.2384	1.40499e-31	protein_coding	tsaA	peroxidase	COG0450	Defense mechanisms
HPG27_RS04645	-1.30311	4.56968e-31	protein_coding	tnpB	transposase	COG0675	Mobilome: prophages, transposons
HPG27_RS00240	-1.30421	9.04065e-29	protein_coding	tnpB	transposase	COG0675	Mobilome: prophages, transposons
HPG27_RS06650	-1.31556	1.24703e-10	protein_coding	HPG27_RS06650	hypothetical protein	-	-
HPG27_RS07835	-1.3572	1.58195e-34	protein_coding	plpA	ABC transporter substrate-binding protein	COG1464	Inorganic ion transport and metabolism
HPG27_RS01220	-1.39843	1.25211e-42	protein_coding	napA	DNA starvation/stationary phase protection protein	COG0783	Inorganic ion transport and metabolism;Defense mechanisms
HPG27_RS01150	-1.4926	3.01773e-41	protein_coding	hopA,omp6	membrane protein	-	-
HPG27_RS07950	-1.51648	9.12078e-20	protein_coding	HPG27_RS07950	ubiquinol-cytochrome C chaperone family protein	COG4735	Unknown
HPG27_RS05850	-1.56281	3.30686e-49	protein_coding	hopQ,omp27	membrane protein	-	-
HPG27_RS02120	-1.69537	0.00110864	protein_coding	rarA	recombinase RarA	COG2256	Replication, recombination and repair
HPG27_RS07920	-1.83302	6.57981e-29	protein_coding	HPG27_RS07920	hypothetical protein	COG0671	Lipid transport and metabolism
HPG27_RS04725	-1.84575	2.76788e-44	protein_coding	HPG27_RS04725	ATPase	COG0699	Replication, recombination and repair
HPG27_RS07915	-1.86043	3.33788e-14	protein_coding	HPG27_RS07915	hypothetical protein	-	-
HPG27_RS02125	-3.92138	3.04967e-73	protein_coding*	hspR	MerR family transcriptional regulator	COG0789	Transcription
